# Supplementary material
Source: Research Square preprint supplement (doi:10.21203/rs.3.rs-9415280/v1)
Supplement: Supplementary file 1 [file 63b58401197b96ae2bacedbf.docx]

# **Appendix A**

**List of Countries in The Sample**

Albania

Angola

Armenia

Azerbaijan

Belarus

Belize

Benin

Bhutan

Bolivia

Botswana

Brazil

Burkina Faso

Cabo Verde

Cambodia

Cameroon

Chad

Colombia

Congo, Rep.

Costa Rica

Cote d'Ivoire

Dominican Republic

Ecuador

Egypt, Arab Rep.

El Salvador

Eswatini

Ethiopia

Fiji

Gambia, The

Georgia

Ghana

Guatemala

Guinea

Honduras

India

Indonesia

Iran, Islamic Rep.

Jamaica

Jordan

Kazakhstan

Kenya

Kyrgyz Republic

Lao PDR

Lesotho

Madagascar

Malaysia

Mali

Mauritania

Mauritius

Moldova

Mongolia

Morocco

Mozambique

Namibia

Nepal

Nicaragua

Niger

Paraguay

Peru

Philippines

Rwanda

Senegal

Serbia

Sierra Leone

Solomon Islands

South Africa

Sri Lanka

Tajikistan

Tanzania

Thailand

Togo

Tunisia

Turkiye

Uganda

Ukraine

Uzbekistan

Vanuatu

# **Appendix B**

# **Table of Variables and Data Sources**

| Variable | Description | Source |
| --- | --- | --- |
| Foreign aid (FA). | Expressed as the official development assistances directed to the recipient country in million dollars (Constant 2015 prices). | The CRS of the OECD. |
| Human Development Index (HDI). | HDI is a composite index developed by the UNDP to assess the overall human well-being of countries. it ranges from 0 to 1, where a higher value reflects higher levels of development. | The HDRs of the UNDP. |
| - Education (MYS). | Education data is measured as mean years of schooling, which is the average number of education years achieved by people aged 25 and more. | The HDRs of the UNDP. |
| - Health (LE). | Health data is measured in terms of life expectancy at birth, which reflects the approximate expected number of years that a newborn child will live under the prevailing health conditions on its labor. | - The HDRs of the UNDP. |
| - Living standard (GNI per Capita). | It is the individual annual income as an indicator of the living standard in the country measured in dollars (2021 PPP). | The HDRs of the UNDP. |
| - Share of the government expenditure on health (GEH). | The government expenditures on health is estimated as the percentage of the country’s GDP that is directed to the health sector. | The WDI of the WB. |
| - Share of the government expenditure on education (GEE). | The government expenditures on education is estimated as the percentage of the country’s GDP that is directed to the education sector. | The WDI of the WB. |
| - Share of the government expenditure on education and health (GEEH). | The government expenditures on health and education is estimated as the percentage of the country’s GDP that is directed to both education and health sectors. | The WDI of the WB. |
| - Urban population size (UPS). | Urban population size is estimated as a percentage of the total population. | The WDI of the WB. |
| - Total investment (INV). | Total investment is measured as gross capital formation and estimated as a percentage of total GDP. | The WDI of the WB. |
| - Inflation rate (INF). | Inflation rate is estimated as the percentage change in the Consumer Price Index (CPI) on a yearly basis (2015 is the base year). | The WDI of the WB. |
| - Unemployment rate (UNEMP). | Unemployment rate is calculated as the percentage of the total labor force unemployed. | The WDI of the WB. |
| - Control of corruption (CC). | This indicator aims at measuring the extent to which public power can be used to pursue private gains. Its score ranges approximately between 2.5 (highest control of corruption) and -2.5 (lowest control of corruption), so that in order to avoid losing any of the data or any measurement errors the natural log (ln) will not be applied to the indicator as it is expected to score negative values for many aid receiving developing countries (Kaufmann et al., 2011). | The WGI of the WB. |

# **Appendix C**

**C.1 Correlation Matrix of The HDI Model**

|  | HDI | FA | GEEH | INV | INF | CC |
| --- | --- | --- | --- | --- | --- | --- |
| HDI | 1 |  |  |  |  |  |
| FA | -0.0695*** | 1 |  |  |  |  |
| GEEH | 0.1765*** | -0.0904*** | 1 |  |  |  |
| INV | 0.0821*** | 0.0052 | -0.1384*** | 1 |  |  |
| INF | 0.0075 | 0.0571** | -0.0396 | 0.0504** | 1 |  |
| CC | 0.2313*** | -0.0568** | 0.3277*** | 0.1039*** | -0.1446*** | 1 |

**C.2 Correlation Matrix of The MYS Model**

|  | MYS | FA | GEE | INV | INF | CC |
| --- | --- | --- | --- | --- | --- | --- |
| MYS | 1 |  |  |  |  |  |
| FA | 0.0475* | 1 |  |  |  |  |
| GEE | 0.0569** | -0.0725*** | 1 |  |  |  |
| INV | 0.0433* | 0.0052 | -0.131 | 1 |  |  |
| INF | -0.0429* | 0.0571** | -0.0555** | 0.0504** | 1 |  |
| CC | -0.0558** | -0.0568** | 0.4096*** | 0.1039*** | -0.1446*** | 1 |

**, **, and *** refer to being statistically significant at 0.10, 0.05, and 0.1 significance levels, respectively.*

*Source: Made by the researchers using STATA.*

**C.3 Correlation Matrix of The LE Model**

|  | LE | FA | GEH | INV | INF | CC |
| --- | --- | --- | --- | --- | --- | --- |
| LE | 1 |  |  |  |  |  |
| FA | -0.0251 | 1 |  |  |  |  |
| GEH | 0.0876*** | -0.0729*** | 1 |  |  |  |
| INV | 0.1324*** | 0.0052 | -0.2045*** | 1 |  |  |
| INF | -0.0645** | 0.0571** | -0.0095 | 0.0504** | 1 |  |
| CC | 0.2016*** | -0.0568** | 0.1252*** | 0.1039*** | -0.1446*** | 1 |

**C.4 Correlation Matrix of The GNI Model**

|  | GNI | FA | GEEH | INV | INF | CC |
| --- | --- | --- | --- | --- | --- | --- |
| GNI | 1 |  |  |  |  |  |
| FA | -0.0847*** | 1 |  |  |  |  |
| GEEH | 0.1239*** | -0.0904*** | 1 |  |  |  |
| INV | 0.0073 | 0.0052 | -0.1384*** | 1 |  |  |
| INF | 0.0553** | 0.0571** | -0.0396 | 0.0504** | 1 |  |
| CC | 0.3359*** | -0.0568** | 0.3277*** | 0.1039*** | -0.1446*** | 1 |

**, **, and *** refer to being statistically significant at 0.10, 0.05, and 0.1 significance levels, respectively.*

*Source: Made by the researchers using STATA.*

# **Appendix D**

**Levin-Lin-Chu (LLC) Unit Root Test for Stationarity**

| Variable | P-value of LLC test  at level | P-value of LLC test  at first difference | Order of integration |
| --- | --- | --- | --- |
| FA | 0.00*** | 0.00*** | I (0) |
| HDI | 0.1654 | 0.00*** | I (1) |
| MYS | 0.0001*** | 0.00*** | I (0) |
| LE | 0.6345 | 0.00*** | I (1) |
| GNI | 0.00*** | 0.00*** | I (0) |
| GEH | 0.0187** | 0.00*** | I (0) |
| GEE | 0.0002*** | 0.00*** | I (0) |
| GEEH | 0.00*** | 0.00*** | I (0) |
| INV | 0.00*** | 0.00*** | I (0) |
| INF | 0.00*** | 0.00*** | I (0) |
| CC | 0.00*** | 0.00*** | I (0) |
| FA*CC | 0.00*** | 0.00*** | I (0) |

*Notes: *, **, and *** refer to being statistically significant at 0.10, 0.05, and 0.1 significance levels, respectively.*

*All reported values are p-values of the test.*

*Source: Made by the researchers using STATA.*
