# Supplementary material
Source: Research Square preprint supplement (doi:10.21203/rs.3.rs-9415280/v1)
Supplement: Supplementary file 2 [file f38a2531d84601d635592657.xlsx]

## Sheet: Sheet1
Country	Year	Mean Years of Schooling	Life expectancy at birth	GNI per capita	Foreign aid	Government expenditure on education	Government expenditure on health	Total investment	Inflation rate	Unemployment rate	Control of corruption	HDI	Control of Corruption (Percentile Rank)
Albania	2002	8.888	75.89	6920.55	262.327	3.1178	5.66464	35.2641	7.77053	17.891	-0.845341	0.692	24.3386
Albania	2003	8.953	76.142	7341.55	296.077	3.13823	5.91141	33.8969	0.484003	16.985	-0.853787	0.701	22.7513
Albania	2004	9.018	76.376	7756.64	201.255	3.22752	5.89365	34.1967	2.28002	16.306	-0.723732	0.707	27.5862
Albania	2005	9.083	76.621	8197.98	235.138	3.28155	5.72955	36.8697	2.36658	15.966	-0.813264	0.72	22.9268
Albania	2006	9.147	76.816	8814.49	232.323	3.19146	5.63177	35.6975	2.37073	15.626	-0.790545	0.728	22.9268
Albania	2007	9.212	77.549	9399.46	212.441	3.27593	5.92609	34.462	2.93268	15.966	-0.70694	0.74	28.6408
Albania	2008	9.277	77.653	9962.43	264.435	3.50923	5.509	35.7784	3.32087	13.06	-0.605212	0.747	33.9806
Albania	2009	9.452	77.781	10153.1	250.861		5.82604	34.5578	2.26692	13.674	-0.545271	0.752	34.9282
Albania	2010	9.627	77.936	10643	243.205	3.41307	6.23668	30.3087	3.62605	14.086	-0.531617	0.766	37.1429
Albania	2011	9.802	78.092	11056.6	210.379	3.24001	6.18298	31.4136	3.42912	13.481	-0.701794	0.779	24.6446
Albania	2012	10.025	78.064	11146.2	172.723	3.30906	6.15746	28.3285	2.03159	13.376	-0.778729	0.789	25.1185
Albania	2013	10.015	78.123	11553	139.987	3.5393	6.28286	28.0525	1.93762	15.866	-0.750956	0.793	24.1706
Albania	2014	10.006	78.407	11691.6	176.462	3.21697	6.43451	25.6747	1.62587	18.055	-0.586141	0.797	34.1346
Albania	2015	9.996	78.644	12016.3	208.517	3.43797	6.46412	25.819	1.89617	17.193	-0.544385	0.797	36.1905
Albania	2016	9.986	78.86	12484.6	176.129	3.96209	6.72933	25.2238	1.27543	15.418	-0.471469	0.795	37.619
Albania	2017	9.977	79.047	12802.2	163.241	3.61172	6.57849	25.0525	1.98666	13.616	-0.480891	0.796	40.4762
Albania	2018	10.025	79.184	13302.7	191.781	3.15294	6.66845	23.9102	2.02806	12.304	-0.54584	0.797	33.3333
Albania	2019	10.073	79.282	13482	185.433	3.91624	6.86214	23.0126	1.41109	11.466	-0.5639	0.8	31.9048
Albania	2020	10.121	76.989	13069.1	206.721	3.3423	7.5192	22.965	1.62089	12.79	-0.572924	0.784	31.9048
Albania	2021	10.121	76.463	14399.8	318.587	3.02256	7.26732	24.8123	2.04147	12.473	-0.576536	0.785	31.9048
Albania	2022	10.121	76.833	15293.3	262.463	2.74931			6.7252	11.588	-0.407876	0.789	38.6792
Angola	2002	3.505	47.386	4658.73	407.163		3.32946	30.4932	108.897	16.342	-1.15549	0.406	7.93651
Angola	2003	3.546	49.617	4682.13	521.12		3.54797	30.4511	98.2241	16.37	-1.33546	0.424	5.29101
Angola	2004	3.586	50.592	4926.36	1222.49		3.9672	30.8937	43.5421	16.267	-1.37757	0.437	5.91133
Angola	2005	3.627	51.57	5385.18	314.376	2.12011	2.8522	27.5566	22.9535	16.268	-1.32318	0.451	6.34146
Angola	2006	3.667	52.369	5666.72	209.731	2.28146	2.68554	23.3008	13.3052	16.121	-1.24104	0.463	7.80488
Angola	2007	3.708	53.642	6355.23	231.995		2.97439	25.7306	12.2515	16.08	-1.30749	0.48	5.33981
Angola	2008	3.748	54.633	6489.31	231.435		3.3229	30.8041	12.4758	16.17	-1.30876	0.492	4.36893
Angola	2009	3.788	55.752	7000.98	194.237	2.92	3.84261	42.8209	13.7303	16.392	-1.39777	0.506	2.87081
Angola	2010	3.829	56.726	6909.37	202.949	3.42132	2.6951	28.1973	14.4697	16.598	-1.33247	0.516	3.80952
Angola	2011	3.869	57.596	6872.53	175.978	3.24	2.64561	26.4244	13.4825	16.77	-1.36747	0.533	3.31754
Angola	2012	3.91	58.623	7256.37	181.676	3.082	2.39575	26.6676	10.2779	16.557	-1.3024	0.545	4.73934
Angola	2013	3.95	59.307	7437.53	191.15	3.87	2.73283	26.143	8.77781	16.487	-1.33687	0.555	4.73934
Angola	2014	3.991	60.04	7651.2	135.35	2.93	2.43413	27.5005	7.28039	16.401	-1.4578	0.565	3.84615
Angola	2015	5.316	60.655	7585.83	324.777	3.1	2.60579	34.2025	9.35597	16.491	-1.42732	0.591	4.28571
Angola	2016	5.417	61.092	7111.87	119.98	2.755	2.71315	27.2147	30.6944	16.58	-1.48334	0.595	4.7619
Angola	2017	5.521	61.68	6772.55	119.372	2.467	2.79384	24.1303	29.8445	16.617	-1.44433	0.597	5.71429
Angola	2018	5.627	62.144	6310.06	116.389	2.045	2.5888	17.8694	19.6289	16.599	-1.19925	0.598	10.9524
Angola	2019	5.735	62.448	5918.03	102.135	2.073	2.47518	17.7123	17.081	16.497	-1.05842	0.597	14.2857
Angola	2020	5.844	62.261	5487.67	90.7297	2.745	3.22071	26.4904	22.2715	16.676	-0.938673	0.594	18.5714
Angola	2021	5.844	61.643	5332.95	148.312	2.297	2.96011	26.4374	25.7543	15.799	-0.65161	0.59	29.0476
Angola	2022	5.844	61.929	5327.79	146.169	2.332		26.256	21.3553	14.693	-0.601941	0.591	30.1887
Armenia	2002	10.559	71.018	5144.31	254.481	2.13504	7.61	25.4183	1.06005	10.872	-0.778165	0.67	28.0423
Armenia	2003	10.629	71.436	5902.46	178.591	2.14504	7.18	28.3479	4.72155	10.757	-0.649022	0.681	31.746
Armenia	2004	10.7	71.421	6610.49	177.982	2.48673	6.06	29.1226	6.96126	10.666	-0.703455	0.689	28.5714
Armenia	2005	10.771	71.792	7579.67	203.678	2.71203	5.86	35.7654	0.638928	10.577	-0.68335	0.701	29.7561
Armenia	2006	10.841	71.987	8681.5	170.565	2.71577	5.85	42.2255	2.89236	10.491	-0.669233	0.714	29.7561
Armenia	2007	10.912	72.327	10016.9	175.466	3.01894	5.5	44.3516	4.40736	10.394	-0.745892	0.73	26.2136
Armenia	2008	10.983	72.398	10843.1	227.285	3.17273	6.64	47.9428	8.94995	10.657	-0.712412	0.733	28.1553
Armenia	2009	11.053	72.813	9186.42	237.16	3.84079	8.44	41.1451	3.40677	10.993	-0.62146	0.732	30.1435
Armenia	2010	11.124	73.16	9517.27	218.474	3.249	9.24	38.8148	8.17636	11.279	-0.69504	0.739	27.619
Armenia	2011	11.195	73.305	9892.56	211.771	3.14385	9.38	31.9218	7.65001	11.534	-0.664559	0.743	27.4882
Armenia	2012	11.289	73.454	10718.4	145.879	2.77248	9.13	24.681	2.55802	11.704	-0.588001	0.751	33.1754
Armenia	2013	11.383	73.676	11336.7	119.915	2.65018	10.32	22.1525	5.78967	11.948	-0.53045	0.757	36.019
Armenia	2014	11.478	74.058	11608.2	117.149	2.24724	10.18	21.283	2.98131	12.201	-0.565155	0.764	35.0962
Armenia	2015	11.572	74.436	11966.5	104.358	2.80591	10.12	20.7305	3.73169	12.468	-0.609267	0.769	31.4286
Armenia	2016	11.69	74.664	11854.3	186.876	2.75812	9.95	18.0155	-1.40361	12.732	-0.659124	0.773	30.9524
Armenia	2017	11.188	74.906	12949.8	195.78	2.70759	10.36	18.4217	0.969553	12.968	-0.636488	0.775	30
Armenia	2018	11.235	75.064	13459	171.546	2.25587	10.01	22.3997	2.52023	13.212	-0.408891	0.781	40
Armenia	2019	11.283	75.439	14521.8	167.162	2.57191	11.38	17.4085	1.44345	12.2	-0.226975	0.789	47.619
Armenia	2020	11.33	72.173	13181.6	117.319	2.70556	12.24	19.6638	1.21144	12.18	-0.0034387	0.769	56.1905
Armenia	2021	11.33	72.043	13813.9	188.491	2.77134	12.34	22.9639	7.18484	10.012	0.0489783	0.774	57.619
Armenia	2022	11.33	73.372	15388.3	388.456	2.49327		21.6343	8.64091	8.608	0.0280352	0.786	56.1321
Azerbaijan	2002	12.208	66.239	4566.54	260.577	3.15446	2.73	34.5765	2.77116	10.04	-1.1955	0.654	6.34921
Azerbaijan	2003	12.257	66.756	5003.81	185.087	3.28615	2.73	53.1715	2.23386	9.17	-1.04623	0.663	10.582
Azerbaijan	2004	12.306	67.346	5312.65	125.176	3.4477	2.66	57.9904	6.70893	7.99	-1.18083	0.67	10.3448
Azerbaijan	2005	12.306	67.562	6251.17	149.514	2.97462	2.23	41.5348	9.67951	7.26	-1.05252	0.682	15.6098
Azerbaijan	2006	12.306	68.165	8249.36	124.041	2.55552	2.07	29.8594	8.32892	6.62	-1.09591	0.701	12.6829
Azerbaijan	2007	10.383	68.603	9876.35	127.917	2.54928	1.99	21.525	16.6998	6.33	-1.12907	0.714	11.165
Azerbaijan	2008	10.45	68.811	11339.8	122.324	2.44093	2.05	18.6936	20.8491	5.86	-1.15665	0.723	10.6796
Azerbaijan	2009	10.517	69.356	12625.6	150.154	3.22431	2.77	18.9486	1.45705	5.74	-1.19408	0.729	9.09091
Azerbaijan	2010	10.584	69.529	13284.9	99.5891	2.78062	2.65	18.0596	5.72687	5.63	-1.24537	0.733	6.66667
Azerbaijan	2011	10.651	69.984	13002.3	165.213	2.43564	2.6	20.2678	7.85833	5.42	-1.19531	0.735	9.47867
Azerbaijan	2012	10.719	70.36	13272.6	196.224	2.06763	3.16	22.3167	1.06621	5.19	-1.14269	0.739	11.8483
Azerbaijan	2013	10.731	70.881	13956.4	132.653	2.44213	3.23	25.6579	2.41572	4.97	-0.970375	0.745	16.5877
Azerbaijan	2014	10.452	71.116	14466.5	164.401	2.63304	3.59	27.51	1.37344	4.91	-1.02249	0.749	14.9038
Azerbaijan	2015	10.466	71.451	14398.4	91.3817	2.95168	4.34	27.9136	4.02769	4.96	-0.952502	0.751	16.6667
Azerbaijan	2016	10.467	72.004	13388.8	112.188	2.90341	4.42	25.6813	12.4434	5	-0.852654	0.752	19.5238
Azerbaijan	2017	10.472	72.248	13587.5	117.201	2.47382	4.07	24.3789	12.9359	5	-0.906025	0.754	17.619
Azerbaijan	2018	10.476	72.76	13533.5	161.09	2.45543	3.84	20.1295	2.26855	4.9	-0.852769	0.757	20.9524
Azerbaijan	2019	10.478	73.102	13897.4	185.119	3.17646	4.18	20.3078	2.61057	5	-0.849424	0.762	22.8571
Azerbaijan	2020	10.476	66.868	13683.8	208.791	4.33205	5.85	23.666	2.75981	7.24	-1.07708	0.722	15.2381
Azerbaijan	2021	10.555	69.366	14408.1	103.588	3.70208	4.7	17.0786	6.6503	6.04	-0.847372	0.738	21.4286
Azerbaijan	2022	10.545	73.488	15018.1	95.7504	2.904		12.0037	13.8523	5.65	-1.04057	0.76	16.9811
Belarus	2002	9.812	68.0561	8943.53			5.62	22.1769	42.5375	10.837	-0.657885	0.718	33.8624
Belarus	2003	10.174	68.5537	9665.07			5.77	24.9543	28.3978	10.155	-0.53734	0.728	37.5661
Belarus	2004	10.536	68.9561	10827.6		5.71226	5.74	28.6673	18.1082	9.443	-0.759293	0.74	25.6158
Belarus	2005	10.536	68.8512	11951	39.1018	5.87103	6.07	28.4605	10.3389	8.748	-0.723231	0.749	26.8293
Belarus	2006	10.536	69.4049	13174.2	46.6411	6.07696	5.57	32.1841	6.99713	8.064	-0.529869	0.761	36.5854
Belarus	2007	10.555	70.2073	14299.8	54.4716	5.1521	5.69	34.0919	8.42675	7.408	-0.574206	0.772	34.466
Belarus	2008	10.644	70.4561	15749.9	60.9973	5.71322	5.29	37.6417	14.8379	6.735	-0.559036	0.782	34.466
Belarus	2009	10.733	70.4073	15705.6	66.5374	4.36894	5.39	36.864	12.9457	6.1	-0.562152	0.784	33.9713
Belarus	2010	10.823	70.4049	16988.2	94.757	5.22004	5.66	40.6564	7.73575	6.054	-0.633431	0.79	30.9524
Belarus	2011	10.914	70.5537	18070.5	65.0955	4.68479	4.87	37.2176	53.2287	6.024	-0.619016	0.798	31.7536
Belarus	2012	11.005	71.9659	18188	52.7041	4.95964	5.25	35.0943	59.2197	5.97	-0.458519	0.805	39.8104
Belarus	2013	11.097	72.4707	18137.5	69.8451	5.00942	5.7	38.798	18.3123	5.946	-0.404938	0.806	42.1801
Belarus	2014	11.19	72.9707	18535.9	76.0503	4.81833	5.39	34.8416	18.1196	5.911	-0.234707	0.81	51.4423
Belarus	2015	11.286	73.6244	17569.8	76.1514	4.78751	6.07	29.0346	13.5345	5.881	-0.31578	0.809	46.6667
Belarus	2016	11.381	73.8268	17048.6	71.8211	4.94655	5.91	26.4774	11.8366	5.844	-0.224087	0.809	49.0476
Belarus	2017	11.476	74.1293	17666.6	78.4575	4.795	5.76	28.0308	6.03184	5.648	-0.240941	0.811	47.1429
Belarus	2018	11.572	74.1756	18287.1	78.1774	5.381	5.53	28.0788	4.8723	4.763	-0.154802	0.812	50.9524
Belarus	2019	11.667	74.2268	18714.1	85.6442	4.97949	5.86	29.1497	5.59816	4.165	0.00728574	0.81	56.1905
Belarus	2020	11.762	72.4572	18404.6	145.219	4.86264	6.41	27.4551	5.54814	4.049	-0.133964	0.8	49.5238
Belarus	2021	11.858	72.3707	19104.3	101.981	4.60641	6.57	24.3805	9.46028	3.9	-0.25815	0.801	47.619
Belarus	2022	11.953	73.1115	18425	92.2324	5.18737		21.5979	15.2097	3.574	-0.579676	0.801	31.6038
Belize	2002	12.048	68.752	8515.89	11.2205		3.59433	20.7446	4.24027	10.04	-0.0708565	0.67	54.4974
Belize	2003	12.144	68.909	8922.24	8.30619	3.93806	3.56306	17.8093	2.31808	10.363	-0.103219	0.679	56.0847
Belize	2004	12.241	69.227	8920.41	7.75926	4.04334	3.4478	16.7944	6.39443	10.601	-0.103966	0.685	53.6946
Belize	2005	12.241	69.376	8908.25	8.02577		3.46699	17.8896	-1.10431	10.91	-0.201738	0.682	51.2195
Belize	2006	12.241	70.093	9040.54	5.5975		3.57005	17.3565	-7.11377	9.39	-0.313596	0.697	44.3902
Belize	2007	7.512	70.655	8923.74	8.96957		4.07867	17.3925	2.31808	8.51	-0.324733	0.704	48.0583
Belize	2008	7.684	71.151	8526.53	5.39026	4.32811	4.53822	21.1498	6.39443	8.18	-0.302956	0.709	47.0874
Belize	2009	7.856	71.819	8647.54	6.84241	4.82869	4.52588	16.3434	-1.10431	8.335	0.0413169	0.715	59.3301
Belize	2010	8.028	72.272	8313.39	10.5783	5.26748	4.49519	15.2727	0.917977	8.424	-0.0235743	0.72	56.6667
Belize	2011	8.52	72.651	8330.02	6.02565	5.52	4.54943	11.5859	1.60206	8.434	-0.307089	0.719	48.3412
Belize	2012	9.011	73.245	8370.26	4.20884	5.472	4.36243	12.5697	1.30058	8.38	-0.0309749	0.722	57.8199
Belize	2013	9.503	73.666	8601.87	19.4453	5.14198	4.4366	14.0594	0.509748	8.349	0.0204453	0.721	58.7678
Belize	2014	9.995	73.311	8704.04	7.16552	5.14773	4.88209	17.2022	1.2014	8.244	-0.159107	0.716	52.8846
Belize	2015	10.486	73.187	9002.7	6.39879	5.35774	4.65366	16.6842	-0.861584	7.578	-0.209246	0.714	51.4286
Belize	2016	10.174	73.399	8764.86	4.66881	5.68084	4.76508	17.9473	0.663427	7	-0.229892	0.72	48.5714
Belize	2017	9.861	73.562	8387.75	7.2502	5.90251	4.6162	15.0463	1.14765	6.596	-0.305804	0.716	44.7619
Belize	2018	9.549	73.703	8204.45	6.09884	6.07499	4.74658	16.5192	0.269983	7.899	-0.169437	0.715	50.4762
Belize	2019	9.236	73.931	8417.43	9.13182	5.90775	4.81374	16.8552	0.187069	9.053	-0.191071	0.718	49.0476
Belize	2020	8.923	72.854	7500.31	8.87901	5.15219	5.30974	18.5071	0.121435	10.7	-0.193349	0.705	46.1905
Belize	2021	8.908	70.47	8509.83	9.26077	5.85649	4.98044	21.7881	3.23564	10.157	-0.330023	0.698	43.8095
Belize	2022	8.893	70.962	9242.08	11.2076	4.47305		21.5917	6.27689	8.724	-0.237029	0.7	48.1132
Benin	2002	12.306	56.606	2507.16	171.833	2.15949	3.09589	14.8337	2.48916	0.69	-0.79571	0.431	26.9841
Benin	2003	12.376	56.738	2515.4	246.327	2.28316	3.11679	15.1638	1.48724	0.747	-0.577583	0.438	35.9788
Benin	2004	12.529	56.826	2551.16	269.947	2.5669	3.23274	15.2186	0.873891	0.79	-0.563023	0.444	33.9901
Benin	2005	12.529	57.125	2522.06	240.766	2.65668	3.22346	12.086	5.36452	0.86	-0.871326	0.45	20.4878
Benin	2006	12.529	57.456	2538.59	259.968	2.5634	3.28774	12.8735	3.78218	0.888	-0.587096	0.456	34.1463
Benin	2007	2.459	57.675	2610.2	252.019	2.36331	2.93716	16.3769	1.29807	0.902	-0.470139	0.464	37.8641
Benin	2008	2.471	57.869	2670.8	295.399	2.77728	2.65178	13.7404	7.9473	0.892	-0.514077	0.47	36.8932
Benin	2009	2.484	57.956	2647.65	333.775	3.08927	2.88893	14.8657	0.896072	0.947	-0.627268	0.475	29.6651
Benin	2010	2.497	58.363	2619.71	367.406	3.67997	3.00989	15.6081	2.20784	1.04	-0.665382	0.481	29.5238
Benin	2011	2.51	58.462	2630.2	464.818	4.4	2.99708	16.4626	2.70424	2.647	-0.605446	0.486	33.1754
Benin	2012	2.522	58.716	2665.52	269.959	3.56202	3.07563	15.2763	6.74468	2.415	-0.857918	0.494	20.3791
Benin	2013	2.535	58.965	2776.71	248.032	3.32751	2.86881	18.8619	0.428889	2.113	-0.745443	0.503	24.6446
Benin	2014	2.548	59.125	2870.76	259.7	3.16179	2.69112	19.2576	-0.548758	1.892	-0.669144	0.506	29.8077
Benin	2015	2.561	59.377	2826.7	214.771	3.17298	2.72813	20.7318	0.218786	1.855	-0.563475	0.509	34.2857
Benin	2016	2.574	59.539	2834.3	253.082	2.8991	2.7955	20.272	-0.79331	1.835	-0.52912	0.508	35.2381
Benin	2017	2.586	59.856	2901.45	362.9	3.53559	2.66814	23.9604	0.0432649	1.722	-0.577509	0.505	33.8095
Benin	2018	2.599	60.14	3009.36	283.162	2.93162	2.88632	26.3865	0.919171	1.473	-0.391388	0.506	41.4286
Benin	2019	2.612	60.454	3124.69	321.741	3.003	2.50914	25.6298	0.732849	1.402	-0.330108	0.506	42.381
Benin	2020	2.625	60.088	3153.24	377.766	2.939	2.4697	25.6338	3.02272	1.565	-0.0403278	0.501	54.7619
Benin	2021	2.637	59.821	3304.54	441.514	3.193	2.5813	28.8506	1.73354	1.694	-0.170944	0.502	49.0476
Benin	2022	2.65	59.954	3406.07	419.193	3.211		36.5258	1.35078	1.473	-0.124256	0.504	51.8868
Bhutan	2002	9.14	64.078	4586.7	35.7678		4.59564	68.5694	2.45536	1.851	0.449922		70.8995
Bhutan	2003	9.18	64.696	4787.38	59.9222		4.12938	66.8603	2.57231	1.8	1.08701		82.0106
Bhutan	2004	9.22	65.268	4952.22	59.4162	6.60907	4.59777	67.7332	4.10594	2.49	0.893403		80.7882
Bhutan	2005	9.22	65.805	5253.96	60.2286	7.28715	4.13416	61.2151	5.31263	3.1	0.871917		79.0244
Bhutan	2006	9.22	66.362	5599.08	52.4231		4.4061	47.8077	5.00045	3.13	0.854817		77.561
Bhutan	2007	2.36	66.954	6484.16	43.5221		4.12985	42.9184	5.15611	3.7	0.928756		78.1553
Bhutan	2008	2.289	67.499	6617.75	44.8248	4.91159	3.38117	44.1635	8.32716	3.833	0.91239		78.6408
Bhutan	2009	2.218	67.897	6888.81	49.4519	4.74174	3.54763	50.1893	4.36112	3.96	0.93731		79.4258
Bhutan	2010	2.586	68.43	7499.17	62.8256	4.12473	3.55879	64.2651	7.03638	3.32	0.938382	0.582	79.5238
Bhutan	2011	2.954	68.881	7949.29	56.8176	4.76523	3.34922	69.6025	8.84899	3.23	0.854587	0.591	77.2512
Bhutan	2012	3.322	69.326	8128.85	65.7962		3.61914	70.6544	10.9197	2.05	0.953947	0.597	79.1469
Bhutan	2013	3.69	69.707	8300.06	54.4719	5.72275	3.70787	65.0351	8.77638	2.87	0.91242	0.604	78.673
Bhutan	2014	4.058	70.049	8686.72	46.6341	6.0449	3.55791	57.3847	8.27106	2.63	1.30613	0.615	88.4615
Bhutan	2015	4.581	70.343	9176.68	40.75	6.238	3.75701	57.2929	4.54814	2.45	0.989678	0.625	80.9524
Bhutan	2016	5.17	70.602	9679.05	30.0763	6.337	3.57614	57.2437	3.21989	2.737	1.09102	0.635	81.4286
Bhutan	2017	5.836	70.847	10032.6	41.8526	6.7	3.34074	54.1678	4.95508	3.039	1.52906	0.644	90.9524
Bhutan	2018	5.836	71.129	10225.4	28.0041	6.074	3.24277	54.0155	2.72396	3.35	1.59052	0.655	91.4286
Bhutan	2019	5.836	71.391	10730.5	38.8574	4.761	3.60361	46.0854	2.72643	2.72	1.57227	0.668	91.4286
Bhutan	2020	7.878	71.609	9896.6	29.3669	5.981	4.36275	39.0706	5.62937	5.03	1.61824	0.675	93.3333
Bhutan	2021	8.012	71.815	10240.7	22.2944	6.974	3.8455	44.3886	7.34681	4.804	1.50712	0.677	90.4762
Bhutan	2022	8.146	72.229	10624.9	60.0197	8.142		55.3399	5.63917	5.947	1.51426	0.681	90.0943
Bolivia	2002	8.878	63.306	5202.96	1102.36		4.89645	16.2947	0.928259	2.606	-0.940808	0.622	22.2222
Bolivia	2003	8.863	63.635	5187.69	791.381		5.1971	13.2321	3.33727	2.657	-0.853619	0.619	23.2804
Bolivia	2004	8.848	64.004	5269.67	996.6		4.86316	11.0217	4.43738	2.618	-0.809159	0.626	24.6305
Bolivia	2005	8.848	64.386	5432.85	544.729	6.71353	5.07408	14.2536	5.39323	2.6	-0.741979	0.634	24.3902
Bolivia	2006	8.848	64.779	5614.77	651.598	6.43422	4.66088	13.8653	4.2824	2.576	-0.431124	0.637	39.5122
Bolivia	2007	7.152	65.027	5755.34	484.588	6.72049	4.69689	15.1867	8.70561	2.615	-0.402194	0.644	39.8058
Bolivia	2008	7.091	65.446	6034.14	501.375	6.72302	4.60677	17.5527	14.0068	2.603	-0.528392	0.651	35.9223
Bolivia	2009	7.029	65.88	6095.94	495.681	7.57486	5.17445	16.9713	3.34645	2.973	-0.631417	0.657	29.1866
Bolivia	2010	6.967	66.162	6184.59	538.864	6.97379	5.20231	17.007	2.50328	2.609	-0.458649	0.661	40
Bolivia	2011	6.905	66.534	6420.56	412.315	6.45056	5.17307	19.8156	9.88446	2.255	-0.573696	0.667	34.1232
Bolivia	2012	7.052	66.705	6488.23	341.805	6.628	5.25394	17.673	4.5156	2.066	-0.727892	0.673	27.4882
Bolivia	2013	7.2	67.021	6807.27	268.093	6.80322	5.57465	19.0177	5.7364	2.437	-0.587771	0.681	35.0711
Bolivia	2014	7.482	67.163	7172.42	290.962	7.47813	5.89614	21.0338	5.7666	2.021	-0.628422	0.683	30.2885
Bolivia	2015	7.712	67.318	7564.84	236.849	8.14343	6.55065	20.2813	4.05961	3.111	-0.71743	0.688	26.6667
Bolivia	2016	7.943	67.628	7891.07	229.269	8.15061	6.83333	21.0574	3.62321	3.498	-0.774184	0.7	24.2857
Bolivia	2017	8.174	67.701	8001.02	363.168	8.09724	6.49019	22.2203	2.82276	3.655	-0.700783	0.707	26.6667
Bolivia	2018	8.426	67.748	8259.27	269.348	8.01587	6.60399	20.5964	2.27206	3.519	-0.688172	0.712	27.619
Bolivia	2019	8.677	67.841	8353.24	353.974	8.09104	6.88793	19.875	1.83955	3.682	-0.780919	0.715	25.7143
Bolivia	2020	8.929	64.467	7592.08	197.372	8.43711	8.02258	15.7781	0.940742	7.903	-0.844051	0.691	22.381
Bolivia	2021	9.163	63.63	7842.71	339.432	7.96174	8.15973	16.7907	0.737384	5.089	-0.883187	0.691	20.4762
Bolivia	2022	9.397	64.928	7987.84	203.734	7.74074		16.6169	1.74633	3.552	-0.889223	0.698	20.7547
Botswana	2002	8.28	50.632	10678.8	51.9101		6.6653	30.1938	8.0328	21.272	0.624538	0.579	74.6032
Botswana	2003	8.398	50.947	11267.1	38.8143		6.40934	30.143	9.1899	23.8	1.24492	0.585	85.1852
Botswana	2004	8.516	51.617	11256.2	46.5416		6.09126	31.3514	6.9457	21.754	0.875726	0.591	79.803
Botswana	2005	8.634	52.61	11696.3	45.4669	10.6786	5.26533	25.3741	8.61023	19.847	1.16079	0.601	82.9268
Botswana	2006	8.752	53.918	12687.6	55.4593		4.87599	21.6928	11.5552	17.782	0.936531	0.615	79.0244
Botswana	2007	8.87	55.732	13360.3	85.2956	9.04667	5.52081	23.0748	7.081	16.99	0.993911	0.629	79.6116
Botswana	2008	9.1	57.121	13318.7	763.772		5.89747	35.4683	12.7022	16.315	1.02253	0.637	81.068
Botswana	2009	9.33	58.279	11578.7	301.123	9.8253	6.62081	32.6299	8.0273	16.169	0.927734	0.639	78.9474
Botswana	2010	9.56	60.013	12163.3	126.843		6.26718	34.7021	6.94888	17.86	1.00335	0.652	80.9524
Botswana	2011	9.79	60.53	13102	115.854		5.86915	39.1181	8.45987	18.062	0.966567	0.66	79.6208
Botswana	2012	10.02	60.8	13117.7	93.366	9.258	6.35011	35.9999	7.5369	17.949	0.906515	0.664	78.1991
Botswana	2013	10.1	61.996	14048.3	111.313	8.017	6.49914	24.8793	5.88461	18.203	0.893463	0.676	77.7251
Botswana	2014	10.18	62.608	14333.9	79.6632	8.223	5.88041	25.2531	4.40225	18.518	0.81304	0.683	76.4423
Botswana	2015	10.26	63.818	13229.5	71.401	8.395	6.10288	28.4433	3.06203	18.939	0.781252	0.688	76.6667
Botswana	2016	10.34	65.464	13070.8	95.0344	8.736	5.76838	22.0677	2.81496	19.343	0.867157	0.697	79.5238
Botswana	2017	10.42	66.753	13397.9	81.093	7.809	6.62987	25.0059	3.30828	19.678	0.712225	0.705	75.7143
Botswana	2018	10.42	65.422	13534.7	78.4381	7.905	6.0401	25.9029	3.23802	19.679	0.719506	0.7	76.1905
Botswana	2019	10.42	65.464	14328	66.0777	8.399	6.12193	30.8204	2.77286	20.094	0.686289	0.703	74.2857
Botswana	2020	2.738	65.647	13261.3	78.4743	8.058	6.12134	32.7272	1.89036	21.017	0.611279	0.701	71.4286
Botswana	2021	2.811	61.141	14101.9	80.7496		6.3093	27.3626	7.24098	23.106	0.665826	0.68	74.7619
Botswana	2022	2.883	65.913	14841.6	67.5309			26.7905	11.6656	23.615	0.661455	0.708	74.0566
Brazil	2002	9.63	70.41	11360.4	358.886	3.75037	8.69687	17.4491	8.45016	10.641	0.0819423	0.678	58.7302
Brazil	2003	9.864	70.72	11374.2	412.422		8.18899	16.8567	14.7149	11.169	0.090239	0.682	59.7884
Brazil	2004	9.828	71.131	11916.8	354.791	3.97448	8.12492	17.9126	6.59719	10.072	-0.0272687	0.689	54.6798
Brazil	2005	9.828	71.753	12169.9	364.43	4.47908	8.0354	17.2049	6.86954	10.551	-0.153748	0.696	51.7073
Brazil	2006	9.828	72.037	12561.7	348.417	4.8706	8.24953	17.8165	4.18357	9.692	-0.12048	0.701	53.1707
Brazil	2007	5.627	72.365	13235.2	390.209	4.97426	8.20183	19.8193	3.64127	9.28	-0.0839888	0.708	54.8544
Brazil	2008	5.804	72.715	13726.2	456.145	5.26884	8.01128	21.6194	5.67859	8.268	0.00343737	0.714	57.767
Brazil	2009	5.981	72.948	13611.1	496.096	5.46355	8.3948	18.7961	4.88803	9.419	-0.0799856	0.717	56.4593
Brazil	2010	6.15	73.182	14364.7	528.889	5.6488	7.94517	21.8013	5.03873	8.424	0.0438064	0.722	60.4762
Brazil	2011	6.32	73.343	14873.2	673.802	5.73741	7.78819	21.8263	6.63645	7.578	0.168382	0.727	63.0332
Brazil	2012	6.502	73.552	15036	1350.09	5.8551	7.73638	21.4172	5.4035	7.251	-0.0468542	0.732	56.3981
Brazil	2013	6.671	73.918	15529.7	1184.49	5.83885	7.9766	21.6938	6.20431	7.071	-0.0976997	0.75	54.9763
Brazil	2014	6.769	74.306	15401	1002.88	5.94848	8.39644	20.5484	6.32904	6.755	-0.365746	0.753	44.2308
Brazil	2015	6.878	74.332	14730.4	917.364	6.24106	8.9093	17.4116	9.0299	8.538	-0.457373	0.752	40.4762
Brazil	2016	7.006	74.442	14098.3	839.676	6.31404	9.16901	14.9695	8.73914	11.58	-0.445451	0.753	39.5238
Brazil	2017	7.216	74.827	14207.2	568.47	6.32048	9.47125	14.6256	3.44637	12.792	-0.559336	0.758	35.7143
Brazil	2018	7.287	75.109	14212.9	600.932	6.08851	9.46475	15.095	3.66485	12.33	-0.480606	0.762	38.0952
Brazil	2019	7.379	75.338	14290.6	587.332	5.96347	9.61449	15.5168	3.73298	11.936	-0.407679	0.764	39.5238
Brazil	2020	7.507	74.009	13814.6	546.909	5.7715	10.1824	16.1158	3.21177	13.697	-0.428935	0.758	37.619
Brazil	2021	7.731	72.75	14342.1	1108		9.89072	19.5219	8.30166	13.159	-0.498798	0.756	34.2857
Brazil	2022	7.852	73.425	14615.9	921.723			18.0882	9.28011	9.231	-0.566063	0.76	32.0755
Burkina Faso	2002	2.842	51.272	1315.08	286.837		2.97113	13.4517	2.17569	2.855	0.12032	0.302	59.7884
Burkina Faso	2003	3.034	51.793	1371.7	337.646		3.14307	15.4593	2.03457	2.78	-0.107514	0.308	55.0265
Burkina Faso	2004	3.137	52.416	1393	358.134		4.21721	15.5181	-0.400229	3.475	-0.149054	0.317	51.2315
Burkina Faso	2005	3.137	53.092	1463.96	382.892	3.94114	3.9511	17.5636	6.41504	4	-0.105527	0.327	53.6585
Burkina Faso	2006	3.137	53.742	1518.5	430.017	3.98219	4.51446	16.125	2.33311	3.67	-0.310118	0.335	44.878
Burkina Faso	2007	1.418	54.375	1533.56	424.553	4.07983	5.23373	18.2511	-0.230627	3.3	-0.329598	0.339	47.5728
Burkina Faso	2008	1.392	55.342	1574.07	452.913		4.64781	20.732	10.6598	3.497	-0.309015	0.352	46.1165
Burkina Faso	2009	1.367	55.959	1561.12	450.85		5.08159	19.99	2.60818	3.715	-0.345607	0.362	44.9761
Burkina Faso	2010	1.343	56.477	1614.95	473.41	3.50223	5.23958	21.9904	-0.764231	3.723	-0.356885	0.372	44.2857
Burkina Faso	2011	1.319	57.125	1651.86	453.562	3.98515	4.64868	22.1235	2.75977	3.827	-0.37865	0.383	43.128
Burkina Faso	2012	0.977	57.619	1732.09	540.341	3.60316	4.60267	24.653	3.81815	3.852	-0.482447	0.393	38.3886
Burkina Faso	2013	1.021	57.823	1776.23	552.981	4.08344	5.56332	23.7099	0.533739	4.055	-0.525301	0.399	36.4929
Burkina Faso	2014	1.065	58.359	1768.63	606.836	4.0533	5.00027	19.2622	-0.25809	4.254	-0.466464	0.403	38.9423
Burkina Faso	2015	1.11	58.845	1779.58	414.276	3.67009	5.13192	19.4067	0.724839	4.468	-0.298838	0.413	47.619
Burkina Faso	2016	1.154	59.326	1831.35	418.172		5.96067	20.7955	0.441041	4.594	-0.169851	0.422	52.381
Burkina Faso	2017	1.198	59.536	1903.89	468.383	5.62847	6.0249	22.0781	1.483	4.66	-0.138817	0.432	51.9048
Burkina Faso	2018	1.242	60.047	1986.42	480.004	5.48861	5.00578	21.7391	1.95594	4.695	-0.131241	0.443	52.8571
Burkina Faso	2019	1.286	60.039	1993.48	603.009	5.407	5.31869	19.7579	-3.23339	4.701	-0.220121	0.446	48.5714
Burkina Faso	2020	1.445	59.731	1978.05	734.256	5.151	6.50193	17.1615	1.88444	4.985	-0.122584	0.446	50.4762
Burkina Faso	2021	1.603	59.27	2059.35	775.48	5.224	6.37691	15.5196	3.65353	5.11	-0.083034	0.445	50.4762
Burkina Faso	2022	1.761	59.766	2037	711.284	5.277		17.708	14.2902	5.348	-0.0836108	0.438	50.9434
Cabo Verde	2002	5.49	70.705	4759.87	47.0464	7.87682	4.75552		1.88453	13.434	0.495939	0.606	71.9577
Cabo Verde	2003	5.526	71.429	4941.14	110.418		4.50009		1.18817	13.635	0.478955	0.612	70.3704
Cabo Verde	2004	5.562	71.999	5074.35	117.523	7.47664	4.37711		-1.89082	13.493	0.338964	0.615	66.0098
Cabo Verde	2005	5.599	72.68	5255.41	132.511		4.27364		0.418892	13.471	0.590596	0.622	71.2195
Cabo Verde	2006	5.635	72.239	5682.85	121.607	6.5296	4.48975		5.36908	13.408	0.838406	0.633	77.0732
Cabo Verde	2007	5.672	72.835	6229.02	123.771	4.95982	4.189	47.2715	4.411	13.325	0.918705	0.639	77.6699
Cabo Verde	2008	5.709	72.508	6561.84	165.957	5.03465	3.58313	45.9358	6.77444	13.331	0.900169	0.643	78.1553
Cabo Verde	2009	5.746	73.088	6399.25	169.444	4.86587	3.88152	41.3603	0.991103	13.517	0.892972	0.645	77.512
Cabo Verde	2010	5.784	73.499	6337.39	259.016	5.07658	4.47556	44.9568	2.07866	10.67	0.877153	0.649	78.0952
Cabo Verde	2011	5.821	74.257	6539.28	209.298	4.59785	4.30527	44.9118	4.47388	10.947	0.924243	0.657	78.673
Cabo Verde	2012	5.859	74.484	6510.95	219.523	5.398	5.13365	35.2039	2.5404	11.137	0.88568	0.657	77.2512
Cabo Verde	2013	5.897	75.059	6523.98	209.939	4.56157	5.28994	29.9873	1.50654	11.386	0.851896	0.664	77.2512
Cabo Verde	2014	5.934	75.24	6404.7	177.254	4.52135	5.32722	34.9963	-0.238778	11.67	0.970904	0.663	79.8077
Cabo Verde	2015	5.986	74.62	6468.56	118.97	4.80622	4.82334	29.107	0.131188	11.905	0.929523	0.658	79.0476
Cabo Verde	2016	6.038	75.742	6676.54	89.1813	4.75476	4.84607	28.5554	-1.40782	12.075	0.844319	0.664	78.0952
Cabo Verde	2017	6.09	76.593	6912.81	107.001	4.59278	5.26837	29.2835	0.784415	12.24	0.798005	0.668	79.0476
Cabo Verde	2018	6.09	75.733	7156.51	61.7941	4.788	4.73805	27.4862	1.257	12.17	0.755642	0.664	78.0952
Cabo Verde	2019	6.09	76.004	7646.22	67.5012	4.13851	4.5632	23.432	1.10667	12.118	0.851037	0.667	79.0476
Cabo Verde	2020	7.486	74.808	6095.13	41.2829		6.12422	28.9619	0.605796	14.66	0.845997	0.649	79.5238
Cabo Verde	2021	7.633	74.052	6499.39	63.2335	6.038	6.90379	27.7498	1.86215	13.906	1.01695	0.65	82.381
Cabo Verde	2022	7.667	74.722	7601.09	49.2949			22.0169	7.93093	12.272	0.983123	0.661	80.6604
Cambodia	2002	3.802	61.226	1590.69	331.021	1.71121	7.22557	20.0208	0.211467	0.853	-0.990784	0.469	17.4603
Cambodia	2003	3.734	62.523	1705.64	369.838		6.93706	22.0693	0.941746	0.909	-0.989836	0.484	14.2857
Cambodia	2004	3.666	63.552	1844.68	320.541	1.71982	7.07894	17.8263	4.31934	1.005	-1.05835	0.499	14.2857
Cambodia	2005	3.598	64.293	2040.34	377.803		6.84559	20.2347	6.61526	1.067	-1.22374	0.51	10.2439
Cambodia	2006	3.674	65.059	2224.94	412.313		6.11889	22.517	5.81069	1.154	-1.26039	0.522	7.31707
Cambodia	2007	3.955	65.731	2425.5	472.399	1.5993	4.90876	21.1973	8.70883	1.257	-1.15169	0.531	10.6796
Cambodia	2008	4.236	66.47	2527.83	453.802		6.60109	18.6167	24.0969	0.825	-1.24171	0.536	5.33981
Cambodia	2009	4.517	67.444	2483.75	467.677	1.66568	7.58331	21.3599	-1.24172	0.579	-1.18124	0.538	9.56938
Cambodia	2010	4.798	67.712	2619.52	509.903	1.53379	6.9117	17.3677	3.9964	0.771	-1.24901	0.542	6.19048
Cambodia	2011	4.998	68.416	2742.9	485.936	1.51069	7.50353	17.0979	5.47845	0.577	-1.25565	0.546	5.21327
Cambodia	2012	5.197	68.915	2876.21	573.199	1.414	7.26115	18.5113	2.93432	0.496	-1.08068	0.551	13.2701
Cambodia	2013	5.197	69.304	3022.22	512.995	1.482	7.10387	20.0089	2.94163	0.438	-1.06372	0.554	12.7962
Cambodia	2014	7.7	69.736	3192.49	538.112	1.567	6.70158	22.0945	3.85569	0.692	-1.14675	0.559	11.5385
Cambodia	2015	7.78	69.873	3370.69	520.253	1.703	6.19432	22.453	1.22393	0.393	-1.15312	0.564	11.4286
Cambodia	2016	7.862	70.224	3565.86	515.339	1.871	6.11648	22.7058	3.01914	0.716	-1.30133	0.573	9.04762
Cambodia	2017	7.944	70.515	3768.48	634.698	2.096	5.65126	22.892	2.91264	0.141	-1.31736	0.581	9.04762
Cambodia	2018	8.027	70.561	3979.34	584.032	2.448	6.0663	23.4483	2.45909	0.13	-1.3568	0.588	8.57143
Cambodia	2019	8.111	70.692	4187.78	683.419	2.826	6.84973	24.2335	1.94258	0.12	-1.32317	0.596	9.52381
Cambodia	2020	8.196	70.416	4101.15	704.697	3.002	7.11157	24.8796	2.9403	0.172	-1.27112	0.596	10.4762
Cambodia	2021	8.282	69.584	4124.45	942.072	1.671	7.53223	23.6501	2.92073	0.396	-1.19749	0.596	11.4286
Cambodia	2022	8.369	69.896	4291.11	990.303			22.7452	5.3437	0.247	-1.2415	0.6	9.90566
Cameroon	2002	3.369	53.415	2883.26	581.012		4.0267	19.4414	2.83442	6.711	-1.20911	0.445	5.82011
Cameroon	2003	3.43	53.883	3020.43	1085.86	2.82259	3.90228	18.0947	0.623164	5.909	-0.981341	0.452	14.8148
Cameroon	2004	3.49	54.178	3180.44	816.028	2.7953	3.72799	18.8678	0.233647	5.088	-1.12544	0.458	11.8227
Cameroon	2005	4.061	54.362	3150.78	555.342	2.65652	3.77274	18.6709	2.01354	4.4	-1.19941	0.459	11.2195
Cameroon	2006	4.632	54.856	3223.57	2014.54	2.53991	3.73663	17.7759	5.11758	3.73	-1.09146	0.46	13.6585
Cameroon	2007	5.203	55.165	3242.91	1815.99	2.87816	3.70859	18.3784	0.921402	3.063	-1.03304	0.472	16.0194
Cameroon	2008	5.355	55.655	3261.03	852.09	2.49827	3.65844	19.7541	5.33781	3.385	-1.03423	0.487	15.534
Cameroon	2009	5.507	56.102	3285.45	391.156	2.9079	3.49997	18.5597	3.04362	3.742	-1.02055	0.502	17.7034
Cameroon	2010	5.659	56.582	3267.74	362.979	2.84803	3.57742	18.2284	1.27538	4.11	-1.07532	0.515	14.2857
Cameroon	2011	5.811	57.133	3282.84	345.672	2.65337	3.85283	18.7324	2.9397	3.989	-1.16693	0.524	11.3744
Cameroon	2012	5.964	57.792	3322.77	313.364	2.60306	3.93102	18.0007	2.7353	3.837	-1.27244	0.535	7.109
Cameroon	2013	6.116	58.476	3378.48	351.405	2.65548	3.63111	18.6515	2.05035	3.687	-1.21758	0.544	9.95261
Cameroon	2014	6.268	58.935	3502.03	469.469	2.58396	3.78765	19.7278	1.8549	3.534	-1.17845	0.553	10.0962
Cameroon	2015	6.42	59.658	3566.03	432.127	2.65792	3.59505	18.2499	2.67624	3.52	-1.09618	0.562	12.381
Cameroon	2016	6.479	60.233	3606.86	543.771	2.56234	3.59378	19.8181	0.87419	3.534	-1.17888	0.566	11.4286
Cameroon	2017	6.537	60.81	3623.47	629.819	3.05963	3.39752	19.4451	0.640409	3.581	-1.22561	0.574	10.9524
Cameroon	2018	6.537	61.18	3663	693.796	3.03096	3.6197	19.538	1.06886	3.619	-1.16267	0.581	11.4286
Cameroon	2019	6.537	61.584	3675.3	753.04	3.047	3.65158	18.9346	2.4528	3.646	-1.21871	0.586	10.9524
Cameroon	2020	5.261	60.833	3581.92	610.21	3.104	3.77177	17.6605	2.43761	3.866	-1.14035	0.585	12.381
Cameroon	2021	5.32	60.333	3473.29	530.842	2.828	3.82407	18.1342	2.27186	3.951	-1.11718	0.581	13.8095
Cameroon	2022	5.379	60.958	3681.47	707.572	2.618		17.7639	6.24768	3.687	-1.12793	0.587	13.2075
Chad	2002	7.45	47.946	988.688	111.336		7.26787	60.1562	5.19182	0.768	-1.27031	0.309	3.7037
Chad	2003	7.612	48.206	897.748	127.743		5.50941	52.1218	-1.75257	0.728	-1.46501	0.309	2.6455
Chad	2004	7.711	48.232	1303.13	199.671	1.59295	5.50013	24.2839	-5.3554	0.679	-1.44835	0.327	2.95567
Chad	2005	7.81	48.312	1378.76	215.727	1.69477	4.84111	20.7043	7.89037	0.67	-1.53199	0.329	0.97561
Chad	2006	7.909	48.286	1225.35	178.396		4.86643	22.1929	8.03629	0.716	-1.36101	0.328	5.36585
Chad	2007	8.045	48.751	1359.11	247.523		4.34313	22.3152	-8.97474	0.829	-1.38899	0.339	3.39806
Chad	2008	8.18	49.024	1312.53	296.698		4.05955	21.879	10.297	0.904	-1.53419	0.343	1.45631
Chad	2009	8.316	49.196	1514.12	409.909	2.31174	4.44167	30.2311	9.95242	0.903	-1.41218	0.357	2.39234
Chad	2010	8.344	49.584	1677.49	327.361	1.98194	4.06023	34.4791	-2.07787	0.873	-1.39424	0.364	2.38095
Chad	2011	8.372	50.009	1634.12	265.65	2.2579	3.91046	28.4721	2.02924	0.899	-1.35516	0.373	3.79147
Chad	2012	8.697	50.54	1720.44	269.865	2.20615	3.85608	31.1003	7.51662	0.893	-1.331	0.381	2.36967
Chad	2013	8.835	50.781	1714	243.708	2.85071	4.06645	29.2525	0.222672	0.942	-1.37011	0.385	3.31754
Chad	2014	8.835	51.202	1773.82	167.534	2.32	4.27317	33.7597	1.68197	0.926	-1.32901	0.392	6.25
Chad	2015	8.835	51.589	1800.05	257.187	2.343	4.52395	28.4592	4.37713	0.968	-1.38144	0.388	5.2381
Chad	2016	10.877	52.083	1652.87	202.944	2.388	4.73397	24.3918	-0.792441	1.044	-1.51161	0.388	4.28571
Chad	2017	10.913	52.308	1559.09	245.634	2.45482	4.6474	21.2931	-1.5371	1.116	-1.458	0.389	4.7619
Chad	2018	10.949	52.825	1540.54	326.053	2.259	4.56769	20.8675	4.27462	1.135	-1.40412	0.393	7.14286
Chad	2019	10.986	53.259	1538.01	293.646	2.372	4.59278	21.4135	-0.971939	1.081	-1.41706	0.398	6.19048
Chad	2020	11.022	52.777	1469.99	285.107	2.74	5.53655	20.5551	4.46414	1.693	-1.42479	0.396	6.19048
Chad	2021	11.058	52.525	1404.79	313.662	2.88813	5.19022	18.9733	-0.772844	1.511	-1.49575	0.393	4.7619
Chad	2022	11.095	52.997	1388.9	303.454	2.539		14.974	5.78803	1.104	-1.48808	0.394	4.71698
Colombia	2002	7.284	71.939	9000.44	705.437	4.26813	5.73297	17.2515	6.35151	14.481	-0.264331	0.676	46.5608
Colombia	2003	6.803	72.361	9150.53	1207.93	4.32514	5.77505	18.6818	7.12979	13.221	-0.204286	0.683	50.7937
Colombia	2004	7.189	72.695	9493.24	770.768	4.07935	5.79892	19.441	5.90402	13.717	-0.140631	0.689	52.2167
Colombia	2005	7.321	73.081	9905.98	868.563	4.02099	6.06711	21.6562	5.05102	11.062	-0.145389	0.701	52.1951
Colombia	2006	7.247	73.468	10423.1	1239.79	3.91672	6.33547	22.939	4.29342	11.091	-0.175138	0.703	52.1951
Colombia	2007	7.394	73.837	10938.9	792.587	4.08301	6.49102	23.4543	5.54438	11.204	-0.27916	0.715	49.0291
Colombia	2008	7.519	74.295	11113.7	1126.56	3.93878	6.84192	23.7209	6.99688	11.273	-0.261543	0.722	49.5146
Colombia	2009	7.626	74.742	11169.3	1065.16	4.77652	7.31135	21.9876	4.20252	12.066	-0.337013	0.728	45.4545
Colombia	2010	7.833	75.033	11472.1	662.88	4.83383	7.0713	21.8888	2.272	11.153	-0.423333	0.732	41.4286
Colombia	2011	7.992	75.32	12028	1052.01	4.46608	6.78077	22.9956	3.41503	10.288	-0.317528	0.738	47.3934
Colombia	2012	8.047	75.597	12421.6	784.696	4.37039	6.74602	22.1046	3.1693	9.959	-0.422298	0.739	42.1801
Colombia	2013	8.222	75.827	12981.5	820.681	4.87855	7.01724	22.1825	2.01699	9.246	-0.441053	0.75	40.2844
Colombia	2014	8.363	76.043	13531	1168.57	4.62946	7.18553	24.0033	2.89884	8.799	-0.397179	0.755	42.7885
Colombia	2015	8.504	76.257	14032.5	1470.2	4.47039	7.52339	23.7737	4.98983	8.572	-0.35224	0.758	44.7619
Colombia	2016	8.643	76.471	14202.4	1169.45	4.47721	7.53117	23.1674	7.51346	8.922	-0.384033	0.763	41.9048
Colombia	2017	8.863	76.646	14089.5	914.402	4.53551	7.67864	21.5994	4.31431	9.086	-0.429445	0.765	42.381
Colombia	2018	8.863	76.748	14064.3	1810.33	4.4491	7.62541	21.1955	3.24057	9.36	-0.339971	0.766	43.3333
Colombia	2019	8.863	76.752	14293.7	1062.48	4.51069	7.77955	21.3806	3.52302	10.28	-0.283157	0.768	46.1905
Colombia	2020	3.03	74.769	13219.8	2026.22	5.2655	8.71432	19.1281	2.52664	15.983	-0.251916	0.756	45.7143
Colombia	2021	3.187	72.83	14402.6	2002.66	3.92	9.01772	18.917	3.49506	13.898	-0.365435	0.752	41.9048
Colombia	2022	3.344	73.659	15013.9	1900.74			19.744	10.1772	10.547	-0.361808	0.758	41.5094
Congo, Rep.	2002	5.439	55.088	672.743	94.5956	3.20832	1.70168	23.4076	4.37876	19.656	-1.00902	0.518	16.4021
Congo, Rep.	2003	5.479	55.948	694.872	50.9625	2.83616	1.91852	26.0903	-0.631845	19.865	-1.09014	0.52	9.52381
Congo, Rep.	2004	5.52	56.986	716.419	47.8513	2.28813	1.92152	22.5203	2.42977	19.883	-1.03629	0.525	15.2709
Congo, Rep.	2005	5.561	58.126	727.517	1615.92	1.68102	1.71774	25.938	3.09449	19.796	-1.05944	0.539	15.122
Congo, Rep.	2006	5.601	58.878	749.804	335.318		1.70861	28.2835	6.53784	19.593	-1.10828	0.552	11.7073
Congo, Rep.	2007	5.642	59.643	765.945	71.8856		1.902	61.0537	2.65465	19.899	-1.16096	0.553	10.1942
Congo, Rep.	2008	5.748	60.426	766.67	353.137		2.23927	42.0714	4.95875	19.954	-1.19325	0.561	8.73786
Congo, Rep.	2009	5.855	61.088	782.894	244.038		2.14222	54.2951	4.415	19.854	-1.21384	0.574	8.13397
Congo, Rep.	2010	5.961	61.683	809.733	1212.59	5.68673	1.85173	47.1902	0.391525	19.379	-1.15732	0.581	12.381
Congo, Rep.	2011	6.227	61.992	826.853	242.335	2.647	1.75237	36.8419	1.75959	19.51	-1.14499	0.584	12.3223
Congo, Rep.	2012	6.493	62.317	848.942	96.1026	2.739	1.90971	43.8168	5.01019	19.573	-1.22975	0.595	9.95261
Congo, Rep.	2013	6.759	62.695	853.077	90.3635	5.014	1.94347	47.0645	4.63162	19.902	-1.17657	0.6	10.4265
Congo, Rep.	2014	6.904	62.95	906.912	56.3905	3.18371	1.97312	52.8446	0.91214	19.781	-1.19982	0.609	9.13461
Congo, Rep.	2015	7.048	63.233	953.809	66.7459	3.28258	2.45668	76.7823	3.1691	20.2	-1.27094	0.61	9.52381
Congo, Rep.	2016	7.127	63.577	1005.02	58.5201		2.77497	71.2669	3.19056	20.524	-1.22709	0.606	10.4762
Congo, Rep.	2017	7.206	63.76	994.637	69.295	4.45052	2.52241	45.8945	0.450064	20.887	-1.36761	0.6	7.61905
Congo, Rep.	2018	7.206	64.053	1006.87	75.34	2.99548	1.89764	29.527	1.15278	20.938	-1.37776	0.603	8.09524
Congo, Rep.	2019	7.206	62.747	998.122	113.898	3.559	2.54176	25.9001	2.20607	20.608	-1.43593	0.596	5.2381
Congo, Rep.	2020	7.359	63.785	1016.94	97.0733	4.619	4.39383	23.7316	1.79537	22.373	-1.46042	0.598	5.2381
Congo, Rep.	2021	7.407	63.519	1023.86	86.4761	3.675	3.87538	21.9769	1.71564	22.077	-1.39148	0.598	6.19048
Congo, Rep.	2022	7.455	63.053	1080.14	127.972	2.952		20.9792	3.04344	20.261	-1.35945	0.593	7.07547
Costa Rica	2002	7.825	77.983	12399.2	53.2717	5.15044	6.86909	19.8863	9.16752	6.396	0.444572	0.721	70.3704
Costa Rica	2003	7.837	78.072	12731.3	56.0003	5.13374	6.96919	18.9651	9.44758	6.654	0.516546	0.726	72.4868
Costa Rica	2004	8.013	78.331	13150.9	63.0159	4.89063	6.63006	18.93	12.3148	6.445	0.284918	0.731	63.0542
Costa Rica	2005	8.288	78.505	13543.8	49.4264		6.6643	18.9641	13.7983	6.749	0.365192	0.739	65.3659
Costa Rica	2006	8.36	78.514	14454	49.0161	4.61614	6.93531	21.0856	11.4706	5.926	0.378651	0.745	70.2439
Costa Rica	2007	8.231	78.462	15479.9	112.653	4.63451	6.99643	23.2868	9.35724	4.557	0.457115	0.754	71.8447
Costa Rica	2008	8.351	78.445	16094.5	92.3924	4.88697	7.46855	24.6107	13.4245	4.934	0.493209	0.762	71.8447
Costa Rica	2009	8.412	78.672	15528.7	103.329	6.0103	7.86019	18.4529	7.8427	7.824	0.71547	0.765	73.2057
Costa Rica	2010	8.581	78.67	16160.6	105.971	6.56574	8.02938	19.8339	5.66276	7.171	0.664392	0.769	72.8571
Costa Rica	2011	8.75	79.348	16639.8	54.7686	6.37989	8.12198	20.0482	4.878	9.518	0.593174	0.778	72.0379
Costa Rica	2012	8.585	79.283	17279.7	47.7213	6.5824	7.78642	19.8542	4.49545	9.11	0.570754	0.782	72.0379
Costa Rica	2013	8.564	79.403	17417.5	54.9528	6.6874	7.68229	19.5905	5.23134	8.218	0.577553	0.787	70.6161
Costa Rica	2014	8.644	78.774	17749.5	59.5583	6.67952	7.66376	19.2232	4.5192	8.499	0.72567	0.79	75
Costa Rica	2015	8.723	79.086	18160.9	105.505	6.8735	7.59196	18.8537	0.801982	8.415	0.687304	0.792	74.2857
Costa Rica	2016	8.764	79.459	18735	92.4764	6.89396	7.31724	18.8889	-0.0174789	8.085	0.678494	0.796	73.3333
Costa Rica	2017	8.804	79.377	19114.8	82.0684	7.06981	7.04523	18.0649	1.62591	7.729	0.432417	0.8	64.2857
Costa Rica	2018	8.804	79.484	19411.2	75.6466	6.76992	7.28588	18.3699	2.22111	9.01	0.501533	0.804	67.1429
Costa Rica	2019	8.804	79.427	19584.6	64.4354	6.73808	7.22125	16.0641	2.09605	10.807	0.627239	0.811	71.9048
Costa Rica	2020	10.172	79.277	18631.6	203.065	6.62898	7.82546	16.1631	0.724911	16.432	0.661663	0.811	74.2857
Costa Rica	2021	10.304	77.023	19913.1	81.8218	6.28171	7.56881	18.5818	1.72648	15.139	0.470483	0.804	66.6667
Costa Rica	2022	10.437	77.32	20248.4	183.05			18.2705	8.27477	11.325	0.465849	0.806	66.9811
Cote d'Ivoire	2002	5.777	50.886	2613.7	1214.18	2.81048	5.90386	12.0235	3.07726	5.516	-0.801531	0.451	26.455
Cote d'Ivoire	2003	5.655	50.954	2537.64	432.543	2.86437	5.47973	13.9684	3.29681	5.858	-1.01384	0.45	13.2275
Cote d'Ivoire	2004	5.532	51.363	2519.29	287.384	2.91176	5.47517	14.7183	1.45799	5.93	-1.24132	0.451	9.85222
Cote d'Ivoire	2005	5.41	51.824	2505.54	229.381	2.91944	5.00639	13.8421	3.88583	6.041	-1.24979	0.453	9.26829
Cote d'Ivoire	2006	5.288	52.355	2486.22	258.31	2.82	4.76327	14.1808	2.46719	6.04	-1.20753	0.455	8.78049
Cote d'Ivoire	2007	5.166	52.97	2476.52	193.858	3.01614	4.5525	13.7263	1.89201	6.308	-1.09507	0.458	12.1359
Cote d'Ivoire	2008	5.044	53.653	2492.57	252.072	3.09853	4.5687	18.18	6.30853	6.404	-1.11905	0.461	12.6214
Cote d'Ivoire	2009	4.922	54.394	2562.1	1746.82	3.17394	4.46967	14.7435	1.0195	6.586	-1.11739	0.465	11.9617
Cote d'Ivoire	2010	4.8	55.023	2670.43	469.343	3.24651	4.41577	21.6811	1.22646	6.614	-1.17285	0.47	10.9524
Cote d'Ivoire	2011	4.678	55.52	2483.81	678.419	2.86576	4.39701	16.5937	4.91243	7.145	-1.03099	0.468	16.5877
Cote d'Ivoire	2012	4.309	56.158	2654.96	2208.73	3.43447	4.42737	20.4508	1.30451	7.223	-0.838509	0.474	21.8009
Cote d'Ivoire	2013	3.94	56.748	2841.45	1508.64	3.4586	3.71774	22.9098	2.58117	4.255	-0.739937	0.48	25.1185
Cote d'Ivoire	2014	4.014	57.208	4155.85	498.56	3.31417	3.73102	22.6205	0.448682	3.275	-0.418946	0.499	42.3077
Cote d'Ivoire	2015	4.089	57.762	4325.23	432.51	3.49413	3.21988	23.3881	1.2515	2.574	-0.462349	0.501	39.0476
Cote d'Ivoire	2016	4.163	58.06	4515.51	540.257	3.93593	3.32101	23.1954	0.723178	1.896	-0.555269	0.506	33.8095
Cote d'Ivoire	2017	4.237	58.48	4694.3	728.592	3.73654	3.24693	20.8188	0.685881	3.273	-0.550527	0.515	36.6667
Cote d'Ivoire	2018	4.237	58.849	4806.42	663.498	3.21165	3.09168	22.2528	0.359409	2.851	-0.525697	0.522	34.2857
Cote d'Ivoire	2019	4.237	59.319	4990.61	721.899	3.44067	3.21497	21.9899	-1.10686	2.401	-0.564522	0.529	32.381
Cote d'Ivoire	2020	3.137	59.032	4938.49	689.661	3.78945	3.62587	21.7429	2.42501	2.559	-0.552297	0.53	32.381
Cote d'Ivoire	2021	3.214	58.598	5156.44	721.903	3.37276	3.13269	23.5753	4.09195	2.59	-0.39568	0.53	40
Cote d'Ivoire	2022	3.292	58.916	5376.4	1073.58	3.51972		26.3529	5.27617	2.434	-0.348596	0.534	42.9245
Dominican Republic	2002	6.854	69.923	9195.33	167.503	1.91401	4.98649	26.9568	5.22337	6.779	-0.472972	0.657	39.6825
Dominican Republic	2003	7.012	70.265	8724.48	142.044	1.84465	4.38888	19.4092	27.4497	6.938	-0.728653	0.66	28.5714
Dominican Republic	2004	7.17	70.331	8668.31	136.26		4.28774	20.6273	51.4609	6.303	-0.592195	0.663	32.0197
Dominican Republic	2005	7.193	70.875	9671.67	112.435		4.35391	24.7731	4.1902	6.587	-0.710663	0.674	28.2927
Dominican Republic	2006	7.216	71.165	10473.7	157.227		3.99365	26.9269	7.57281	5.655	-0.723455	0.684	27.8049
Dominican Republic	2007	7.24	71.371	11102.6	128.912	2.04679	4.08935	28.3514	6.14357	5.158	-0.775851	0.692	24.2718
Dominican Republic	2008	7.331	71.658	11481.2	155.451		4.56146	30.0237	10.6446	4.764	-0.752359	0.697	26.699
Dominican Republic	2009	7.429	71.871	11435.1	120.943		4.76338	23.5735	1.44215	5.467	-0.806729	0.701	22.0096
Dominican Republic	2010	7.517	72.093	12229.4	149.564		4.92355	26.38	6.32993	5.212	-0.883081	0.707	20.9524
Dominican Republic	2011	7.65	72.221	12418.2	233.55		5.03798	25.0263	5.79677	6.087	-0.844827	0.712	21.327
Dominican Republic	2012	7.718	72.514	12583.5	245.627		5.04898	24.2957	3.6945	6.722	-0.897265	0.718	19.4313
Dominican Republic	2013	9.044	72.713	12930.7	123.328	3.628	4.91598	22.7237	4.83095	7.352	-0.911616	0.722	20.3791
Dominican Republic	2014	8.985	72.867	13660.6	118.084	3.622	4.79757	23.1129	2.99864	6.719	-0.841781	0.728	22.5962
Dominican Republic	2015	8.925	72.953	14522.4	303.102	3.604	4.72217	23.4421	0.836746	7.605	-0.87349	0.739	20.4762
Dominican Republic	2016	8.865	72.987	15274.8	187.923	3.85	4.57663	22.9722	1.61417	7.284	-0.810026	0.759	22.8571
Dominican Republic	2017	9.151	73.063	15740.9	141.296	3.92	4.49337	22.4719	3.27956	5.832	-0.787118	0.761	22.381
Dominican Republic	2018	9.151	73.232	16736.2	97.1381	3.918	4.12602	25.7957	3.56443	5.861	-0.830727	0.763	22.381
Dominican Republic	2019	9.151	73.577	17341	125.527	4.043	4.23949	26.0048	1.8106	6.356	-0.838781	0.765	23.3333
Dominican Republic	2020	6.783	72.889	15993.2	389.215	4.518	4.93998	25.383	3.78103	6.126	-0.751167	0.76	25.7143
Dominican Republic	2021	6.87	72.615	17784.1	432.456	3.747	4.91816	31.3521	8.243	7.702	-0.590034	0.756	30.9524
Dominican Republic	2022	6.957	74.17	18653.3	358.557	3.94		33.2764	8.81109	5.504	-0.439608	0.766	36.7925
Ecuador	2002	7.604	73.613	8236.87	339.982		4.47672	19.6563	12.4836	4.825	-0.868261	0.697	23.8095
Ecuador	2003	7.661	73.975	8292.84	284.432		5.44399	15.7731	7.92936	5.662	-0.728124	0.701	29.1005
Ecuador	2004	7.718	74.279	8787.61	300.94		5.56991	16.2503	2.74323	5.002	-0.72667	0.708	27.0936
Ecuador	2005	7.726	74.514	9144.91	267.951		5.59754	17.4645	2.16828	3.779	-0.735879	0.714	25.3659
Ecuador	2006	7.74	74.689	9419.4	253.465		5.70635	18.1181	3.29875	3.55	-0.784096	0.719	24.3902
Ecuador	2007	7.849	74.844	9444.18	226.4		5.43095	18.3176	2.27618	3.142	-0.745632	0.722	26.699
Ecuador	2008	7.907	74.983	10034.1	260.514		5.46596	21.5659	8.4001	3.917	-0.654706	0.728	31.068
Ecuador	2009	8.097	75.184	9965.53	194.429	4.34242	5.79984	21.1732	5.15997	4.608	-0.744574	0.73	24.8804
Ecuador	2010	8.289	75.43	10209	188.771	4.50743	6.22109	23.49	3.55438	4.088	-0.707744	0.736	26.1905
Ecuador	2011	8.361	75.743	10818.6	188.853	4.72689	6.58094	23.5321	4.47453	3.458	-0.641708	0.743	28.91
Ecuador	2012	8.702	76.062	11248.7	167.813	4.64307	6.86373	23.0133	5.10172	3.235	-0.508598	0.75	36.9668
Ecuador	2013	8.693	76.369	11622.5	171.299	5.00464	6.88127	24.8834	2.72178	3.083	-0.502528	0.755	37.4408
Ecuador	2014	8.766	76.622	11883	179.945	5.26099	6.832	24.7059	3.58922	3.48	-0.740625	0.759	26.9231
Ecuador	2015	8.783	76.789	11697.4	211.452	4.9987	7.60513	22.6864	3.96665	3.616	-0.672159	0.764	29.0476
Ecuador	2016	8.8	76.763	11370.3	235.184	4.363	7.41604	20.2461	1.72826	4.597	-0.680527	0.761	28.5714
Ecuador	2017	8.817	76.972	11406.5	172.667	4.614	7.53718	22.4804	0.417336	3.836	-0.625844	0.762	30.9524
Ecuador	2018	9.113	77.094	11287.7	244.598	4.621	7.8261	22.5404	-0.224103	3.53	-0.62915	0.761	29.5238
Ecuador	2019	8.97	77.297	11053.2	426.412	4.22566	7.77071	21.0492	0.266013	3.812	-0.509075	0.758	34.7619
Ecuador	2020	6.384	72.153	10079.8	292.233	4.11402	8.3589	17.5849	-0.338872	6.127	-0.503778	0.734	33.8095
Ecuador	2021	6.392	73.67	10497	260.176	3.69138	8.28662	20.9726	0.133251	4.552	-0.594089	0.746	30
Ecuador	2022	6.401	77.894	10693.2	392.86	3.64704		22.2936	3.46617	3.761	-0.629928	0.765	29.717
Egypt, Arab Rep.	2002	6.409	68.564	8012.49	2098.79		5.51074	17.9995	2.73724	10.01	-0.440158	0.634	41.2698
Egypt, Arab Rep.	2003	6.417	68.402	8077.19	1474.47	4.94563	5.22425	16.8862	4.50778	10.91	-0.530748	0.632	38.0952
Egypt, Arab Rep.	2004	6.656	68.613	8227.83	1885.95	4.67072	4.85732	16.938	11.2706	10.32	-0.583506	0.635	32.5123
Egypt, Arab Rep.	2005	6.895	68.779	8425.17	1395.57	4.79443	4.92229	17.9759	4.8694	11.049	-0.5395	0.637	36.0976
Egypt, Arab Rep.	2006	7.134	68.977	8898.63	1121.23	4.00178	4.8419	18.7308	7.64453	10.49	-0.737334	0.642	26.3415
Egypt, Arab Rep.	2007	7.373	69.128	9382.94	1521.15	3.68461	4.44493	20.8512	9.31897	8.8	-0.73787	0.649	27.1845
Egypt, Arab Rep.	2008	7.612	69.319	9851.85	1549.45	3.76083	4.46635	22.3897	18.3168	8.517	-0.765909	0.656	25.2427
Egypt, Arab Rep.	2009	7.851	69.48	10036.7	1169.06	3.63919	4.37871	19.1902	11.7635	9.087	-0.464863	0.661	38.756
Egypt, Arab Rep.	2010	8.09	69.664	10130.4	960.521	3.54265	4.15319	19.5011	11.2652	8.757	-0.596872	0.667	32.381
Egypt, Arab Rep.	2011	8.329	69.88	10017.4	744.169	3.3443	4.35708	17.1031	10.0649	11.849	-0.633264	0.671	30.3318
Egypt, Arab Rep.	2012	8.568	70.085	10036.4	866.463	3.3683	4.45892	16.0268	7.11173	12.597	-0.579664	0.679	33.6493
Egypt, Arab Rep.	2013	8.807	70.052	9993.03	928.023	4.12253	4.671	14.212	9.46972	13.154	-0.613802	0.684	33.6493
Egypt, Arab Rep.	2014	9.046	70.415	10067.8	660.768	4.25139	4.77415	13.6432	10.0702	13.105	-0.575115	0.688	34.6154
Egypt, Arab Rep.	2015	9.306	70.483	10348.9	738.631	3.93085	5.06153	14.2886	10.3705	13.052	-0.600651	0.695	32.8571
Egypt, Arab Rep.	2016	9.573	70.844	10618	913.472		5.07462	15.0402	13.8136	12.45	-0.590742	0.702	31.9048
Egypt, Arab Rep.	2017	9.848	71.302	10792.8	832.766		5.34662	17.1449	29.5066	11.767	-0.495696	0.709	39.0476
Egypt, Arab Rep.	2018	9.848	71.367	11092.5	1263.83		4.74893	18.709	14.4015	9.855	-0.514393	0.717	34.7619
Egypt, Arab Rep.	2019	9.848	71.358	11376.2	1338.55		4.59947	20.0536	9.1528	7.851	-0.655166	0.724	28.5714
Egypt, Arab Rep.	2020	4.711	70.99	11637.2	978.85		4.15385	15.9949	5.04493	7.974	-0.810555	0.729	23.8095
Egypt, Arab Rep.	2021	4.703	70.221	11826.9	1184.89		4.60955	15.1716	5.21405	7.441	-0.705532	0.726	26.6667
Egypt, Arab Rep.	2022	4.696	70.159	12360.8	1386.97			17.0188	13.8957	7.344	-0.67881	0.728	26.8868
El Salvador	2002	10.237	70.232	6423.78	252.034	3.24284	7.88566	17.0647	1.86553	6.2	-0.813145	0.621	25.9259
El Salvador	2003	10.305	70.14	6462.38	245.379	3.13467	7.77182	18.4292	2.12039	6.9	-0.416794	0.627	41.7989
El Salvador	2004	10.374	70.34	6503.16	291.29		8.13022	18.1407	4.45194	6.8	-0.480672	0.633	35.9606
El Salvador	2005	10.572	70.44	6674.02	216.328	3.17785	9.20058	18.6047	4.69095	7.22	-0.508674	0.64	38.5366
El Salvador	2006	10.568	70.773	7016.27	182.862	3.49298	8.69339	20.0755	4.03712	6.57	-0.335918	0.645	42.9268
El Salvador	2007	10.565	71.108	7141.12	199.763	3.60985	8.47836	20.8	4.57809	6.41	-0.423062	0.651	38.835
El Salvador	2008	10.721	71.424	7311.62	236.019	4.45811	8.49586	20.1726	6.70792	5.88	-0.411014	0.651	41.2621
El Salvador	2009	11.018	71.576	7058.05	308.071	4.6595	8.8375	14.0546	1.05595	7.33	-0.230228	0.651	50.2392
El Salvador	2010	11.13	71.848	7200.45	355.849	4.04808	8.90416	16.6716	1.17934	4.893	-0.258609	0.657	49.5238
El Salvador	2011	11.162	71.859	7439.63	329.287	3.89854	8.87645	17.7899	5.12892	4.297	-0.247806	0.657	51.1848
El Salvador	2012	11.266	71.831	7537.69	291.498	3.71244	8.60625	17.7095	1.72973	3.843	-0.412513	0.661	42.654
El Salvador	2013	11.37	71.771	7642.28	181.398	3.80149	9.05236	17.0194	0.757669	3.693	-0.349039	0.664	45.4976
El Salvador	2014	11.505	71.746	7738.04	132.657	3.82416	8.59894	16.3972	1.14134	4.154	-0.374781	0.663	43.2692
El Salvador	2015	11.505	71.814	7882.91	129.959	3.90988	8.75833	16.017	-0.731384	3.998	-0.447237	0.663	40.9524
El Salvador	2016	11.505	72.025	8011.43	176.378	3.82524	8.71456	15.9675	0.604049	4.418	-0.555807	0.664	33.3333
El Salvador	2017	5.726	72.311	8139.19	194.286	3.72523	8.42287	16.677	1.01235	4.385	-0.533898	0.667	37.1429
El Salvador	2018	5.726	72.555	8319.12	272.184	3.60575	8.32275	18.3715	1.09033	4.006	-0.586035	0.673	32.381
El Salvador	2019	5.726	72.559	8575.43	330.693	3.38711	8.80846	18.3448	0.0753241	4.17	-0.537629	0.676	33.8095
El Salvador	2020	5.726	71.061	7876.92	366.012	3.65958	9.08151	17.2116	-0.37159	5.008	-0.577218	0.666	30.9524
El Salvador	2021	5.726	70.748	8718.94	252.829	3.52808	9.71643	23.3549	3.46693	4.327	-0.553035	0.669	32.8571
El Salvador	2022	5.726	71.475	8886.17	228.822	4.531		23.2088	7.19862	2.999	-0.642081	0.674	27.3585
Eswatini	2002	6.488	44.486	5662.49	12.4065	4.44087	5.52298	21.4114	12.0197	25.734	-0.0601399	0.444	55.5556
Eswatini	2003	6.398	43.349	5705.25	18.8985	5.81677	6.37864	19.2887	7.29	26.229	-0.0731399	0.438	58.2011
Eswatini	2004	6.308	42.538	6001.42	10.1563	5.40161	6.81432	19.3713	3.44534	26.695	-0.24253	0.436	49.2611
Eswatini	2005	6.22	42.125	6698.02	28.5147	6.48462	7.37623	17.3517	4.774	27.208	-0.275532	0.439	48.2927
Eswatini	2006	6.133	43.12	6691.21	16.2182	6.55476	7.8256	16.4738	5.30464	27.689	-0.0448689	0.454	55.6098
Eswatini	2007	6.046	43.641	7001.12	21.9898		7.93004	16.0393	8.07609	28.24	-0.0452501	0.464	56.3107
Eswatini	2008	5.959	44.175	6924.96	23.3271	6.61812	8.85793	15.6979	12.6575	27.847	0.0363582	0.473	58.2524
Eswatini	2009	5.872	44.639	6861.93	30.5592	6.47135	8.63292	15.3808	7.44823	27.404	-0.0111769	0.481	58.3732
Eswatini	2010	5.785	46.619	6872.29	39.3977	6.11837	8.59126	14.4818	4.50924	26.753	-0.041858	0.498	56.1905
Eswatini	2011	5.769	48.195	6923.97	77.3393	6.86433	8.46997	12.8959	6.10743	25.994	-0.184127	0.514	53.5545
Eswatini	2012	5.753	49.835	7215.89	69.2714	5.593	7.82048	11.8245	8.93965	25.118	-0.22443	0.53	51.1848
Eswatini	2013	5.737	51.486	7623.23	57.4427	5.085	7.45703	12.2213	5.62131	24.435	-0.228339	0.546	51.1848
Eswatini	2014	5.737	53.05	7642.68	62.926	7.07059	7.25597	12.595	5.68135	23.817	-0.256666	0.56	50
Eswatini	2015	5.737	55.019	7780.98	49.9606	5.355	7.05855	12.5147	4.95124	23.279	-0.215674	0.577	50.4762
Eswatini	2016	1.383	56.659	7676.16	74.0504	5.434	6.82045	12.84	7.84727	22.718	-0.232138	0.59	48.0952
Eswatini	2017	1.433	57.895	7663.39	95.6785	6.178	6.98104	12.8307	6.22138	24.83	-0.0731136	0.601	54.2857
Eswatini	2018	1.484	59.411	7744.31	79.1482	5.737	6.62469	13.2459	4.81506	26.983	-0.231746	0.613	46.6667
Eswatini	2019	1.54	60.549	7668.52	59.6007	5.699	7.15369	13.5696	2.59802	29.049	-0.328445	0.623	43.3333
Eswatini	2020	1.596	59.692	7438.34	79.7032	5.36	6.59767	12.263		34.232	-0.296207	0.622	44.7619
Eswatini	2021	1.652	57.066	8139.39	77.0429	5.287	7.03582	13.6256		35.707	-0.702007	0.612	27.1429
Eswatini	2022	1.709	56.36	8391.85	80.9623	5.693		11.7876		37.852	-0.668882	0.61	25
Ethiopia	2002	2.06	51.517	743.233	626.756	3.63245	4.71263	0	0.675089	3.061	-0.717909	0.305	31.2169
Ethiopia	2003	2.097	52.533	706.339	1454.16		4.89971	0	13.674	3.002	-0.777412	0.31	25.9259
Ethiopia	2004	2.135	53.235	778.931	1265.24		4.31282	0	3.32737	2.771	-0.757493	0.323	26.1084
Ethiopia	2005	2.172	54.008	850.782	1557.99		4.10098	0	9.96997	2.497	-0.772508	0.343	23.4146
Ethiopia	2006	2.223	55.149	915.68	1171.38	5.49096	4.45757	0	12.2995	2.346	-0.650105	0.359	30.7317
Ethiopia	2007	2.274	56.426	993.497	1322.33	5.45113	5.00128	0	17.2404	2.344	-0.632186	0.376	30.5825
Ethiopia	2008	2.325	57.592	1069.6	1998.87	5.4082	4.28064	0	44.3567	2.333	-0.6664	0.391	30.0971
Ethiopia	2009	2.376	58.804	1129	2021.8	4.42207	4.64983	0	8.48364	2.331	-0.704722	0.399	25.8373
Ethiopia	2010	2.427	59.73	1234.25	2096.62	4.49659	5.46637	0	8.14926	2.299	-0.694109	0.409	28.0952
Ethiopia	2011	2.411	60.721	1333.21	2030.86	5.48576	4.46898	32.1077	33.25	2.274	-0.667877	0.419	27.0142
Ethiopia	2012	2.395	61.543	1408.06	1941.37	5.56678	4.5396	37.098	23.6004	2.255	-0.608587	0.426	32.2275
Ethiopia	2013	2.38	62.373	1514.79	2032.06	4.49855	4.07507	34.0811	7.46402	2.251	-0.501512	0.437	37.9147
Ethiopia	2014	2.391	62.905	1624.76	2002.58	4.60202	4.03366	37.9937	6.89002	2.364	-0.447899	0.445	40.8654
Ethiopia	2015	2.391	63.649	1743.65	2085.74	5.153	3.82317	40.6713	9.5689	2.45	-0.476132	0.455	38.5714
Ethiopia	2016	2.391	64.392	1858.3	2371.41	5.062	3.60034	37.3488	6.62813	2.566	-0.442178	0.465	40
Ethiopia	2017	11.867	64.838	1976.16	2543.48	5.499	3.45337	38.444	10.6871	2.678	-0.582521	0.472	33.3333
Ethiopia	2018	12.091	65.412	2058.32	2242.16	5.22	3.30372	34.7288	13.833	2.825	-0.504966	0.479	36.6667
Ethiopia	2019	12.137	65.838	2168.38	2392.79	4.481	3.23382	35.264	15.8096	2.945	-0.435478	0.485	38.0952
Ethiopia	2020	12.183	65.371	2240.35	2498.87	4.091	3.48096	30.579	20.3563	4.024	-0.390404	0.489	40.4762
Ethiopia	2021	12.232	64.975	2307.08	2556.74	4.065	3.20824	28.0253	26.8395	3.935	-0.422971	0.489	38.0952
Ethiopia	2022	12.275	65.645	2368.76	2756.15	3.736		25.3422	33.8899	3.493	-0.440879	0.492	37.7358
Fiji	2002	9.38	65.748	9622.01	35.5721	6.27587	2.9835	23.2825	0.762032	4.77	0.610876	0.671	73.545
Fiji	2003	9.519	66.177	9553.75	53.3271		2.97298	27.5941	4.17275	4.739	0.276082	0.675	65.0794
Fiji	2004	9.658	66.424	9969.34	45.0842	6.20916	3.25769	28.3288	2.82749	4.7	0.290087	0.682	63.5468
Fiji	2005	9.797	66.632	9774.01	48.9391	5.16706	3.25657	20.1097	2.36576	3.886	-0.224627	0.684	49.7561
Fiji	2006	9.936	66.855	9714.81	52.5693	5.65532	3.34798	19.5008	2.49084	3.957	0.184131	0.687	60
Fiji	2007	10.075	66.826	9626	38.6655	5.89472	3.41515	16.9865	4.80371	4.103	0.121461	0.689	59.7087
Fiji	2008	10.214	66.935	9684.42	38.6438	4.25357	3.18467	23.4233	7.73228	4.182	0.0983418	0.693	59.7087
Fiji	2009	10.353	67.089	9701.51	53.1441	4.49848	3.53588	18.7341	3.13104	4.302	-0.154777	0.696	53.11
Fiji	2010	10.491	67.328	9679.92	58.9602		3.41664	18.8027	3.68901	4.342	-0.159898	0.699	53.3333
Fiji	2011	10.63	67.523	9910.92	52.4402	4.17306	3.14294	20.9985	7.27812	4.406	0.108836	0.704	60.1896
Fiji	2012	10.566	67.552	9956.77	73.4671	4.462	3.26555	17.2722	3.42338	4.375	0.181172	0.707	63.0332
Fiji	2013	10.501	67.428	10588.3	62.2362	3.88289	3.20041	27.6334	2.91354	4.356	0.195707	0.712	63.0332
Fiji	2014	10.436	67.376	10850.9	69.9903	3.77	3.3686	20.8868	0.519306	4.325	0.385207	0.715	65.8654
Fiji	2015	10.371	66.844	11166.1	75.8591	4.809	3.32469	22.4179	1.37489	4.292	0.377842	0.716	64.7619
Fiji	2016	10.371	67.24	11499.4	106.109	4.836	3.2798	21.1162	3.86323	4.32	0.335443	0.721	64.2857
Fiji	2017	9.854	67.79	11808.6	99.4738	4.881	3.1869	21.4237	3.34758	4.328	0.638752	0.728	72.381
Fiji	2018	10.046	67.81	12417.5	90.0242	5.038	4.10573	21.0487	4.08148	4.34	0.699863	0.731	75.7143
Fiji	2019	10.238	67.893	12117.8	90.2332	5.118	4.25136	19.4977	1.7731	4.38	0.688096	0.73	74.7619
Fiji	2020	10.317	67.924	10249	123.275	5.747	4.76918	16.3169	-2.59524	4.623	0.613188	0.722	71.9048
Fiji	2021	10.444	67.114	9727.72	383.566	5.975	5.38085	19.6049	0.155856	4.678	0.44321	0.715	65.7143
Fiji	2022	10.57	68.312	11233.7	165.195			19.1291	4.52019	4.481	0.38857	0.729	64.6226
Gambia, The	2002	2.966	57.08	1945.44	16.6409	1.44292	6.27724	7.27833	8.60912	9.965	-0.233313	0.402	48.6772
Gambia, The	2003	3.069	57.586	1955.49	22.1089	1.36338	5.32621	10.0389	17.0329	9.93	-0.176545	0.408	51.8519
Gambia, The	2004	3.173	58.088	2129.53	13.2921	0.62247	5.42	14.3184	14.2067	9.897	-0.52241	0.419	34.9754
Gambia, The	2005	3.306	58.394	2018.05	14.5074	0.69188	5.38602	13.8319	4.83862	9.878	-0.694695	0.422	28.7805
Gambia, The	2006	3.438	59.06	1941.11	25.7644	0.75163	5.43721	15.6907	2.0565	10.196	-0.729944	0.427	26.8293
Gambia, The	2007	3.571	59.394	1945.65	30.8703	0.81686	4.95502	12.5665	5.36913	10.383	-0.712738	0.433	28.1553
Gambia, The	2008	3.677	60.082	2013.66	31.3358	2.1813	4.65939	10.5224	4.44365	10.041	-0.714707	0.442	27.6699
Gambia, The	2009	3.783	60.427	2075.72	26.8225	1.90814	4.46431	12.8914	4.56151	9.769	-0.557291	0.446	34.4498
Gambia, The	2010	3.888	60.717	2132.03	29.6639	2.56322	4.11944	13.8767	5.04968	9.673	-0.587573	0.449	32.8571
Gambia, The	2011	3.994	61.526	1891.35	30.9624	2.50117	4.36967	12.8962	4.79588	10.269	-0.513805	0.45	37.4408
Gambia, The	2012	4.1	62.096	1933.8	27.6045	2.63757	4.26872	20.8772	4.25432	10.346	-0.653232	0.457	30.8057
Gambia, The	2013	4.306	62.114	1927.93	28.513	1.81839	3.91375	14.7136	5.69913	9.468	-0.706012	0.461	27.4882
Gambia, The	2014	4.512	62.269	1842.01	19.6196	2.23094	3.05235	16.6546	5.948	8.224	-0.693983	0.462	28.3654
Gambia, The	2015	4.512	62.494	1859.85	23.4282	2.16003	3.17613	20.3515	6.80845	7.271	-0.813673	0.467	23.3333
Gambia, The	2016	4.512	63.013	1852.72	23.349	2.02443	3.19524	24.9215	7.22879	6.299	-0.850145	0.472	20.4762
Gambia, The	2017	2.149	62.995	1890.8	51.4508	2.459	3.35449	22.9612	8.03419	5.162	-0.657366	0.477	29.5238
Gambia, The	2018	2.271	63.04	1977.09	47.5708	2.36544	3.34384	20.8781	6.52097	4.127	-0.501664	0.483	37.1429
Gambia, The	2019	2.419	63.755	2049.42	43.3377	2.655	3.15857	22.0393	7.11568	4.532	-0.408289	0.492	40
Gambia, The	2020	2.566	62.612	2013.67	41.3411	2.887	3.72824	27.5089	5.93128	5.858	-0.425883	0.492	38.0952
Gambia, The	2021	2.713	62.083	2022.24	40.9812	2.94	3.18963	30.3708	7.37035	6.206	-0.382034	0.49	40.9524
Gambia, The	2022	2.861	62.906	2089.63	43.8947	2.728		33.0066	11.5131	6.082	-0.278427	0.495	46.6981
Georgia	2002	12.266	70.024	5596.45	305.052	2.23502	7.81	28.5012	5.58784	12.59	-1.26414	0.709	4.2328
Georgia	2003	12.323	70.333	6270.08	224.653	2.0656	8.03	29.0959	0.837735	11.51	-0.650767	0.719	31.2169
Georgia	2004	12.381	70.567	6751.49	269.475	2.9142	8.09	30.9874	5.65633	12.62	-0.459568	0.727	37.4384
Georgia	2005	12.439	71.13	7423.63	262.616	2.48432	8.08	33.3296	8.24709	13.81	-0.212854	0.738	50.2439
Georgia	2006	12.496	71.394	8243.6	266.35	3.00365	7.63	29.7348	9.16097	13.57	0.0501525	0.744	58.5366
Georgia	2007	12.557	71.568	9174.36	274.543	2.69687	7.44	33.4546	9.2449	13.28	-0.128835	0.755	53.3981
Georgia	2008	12.618	71.332	9297.17	713.52	2.91955	8.44	27.6898	9.99949	17.87	-0.102076	0.751	53.8835
Georgia	2009	12.716	71.95	9037.95	530.823	3.22238	9.57	13.9859	1.72751	20.71	-0.122036	0.756	54.5455
Georgia	2010	12.815	72.128	9581.98	425.253	2.80365	9.07	20.9291	7.11018	20.203	0.0123016	0.763	57.619
Georgia	2011	12.874	72.39	10268.2	362.313	2.57614	8.01	23.1207	8.54293	19.632	0.11752	0.771	61.1374
Georgia	2012	13.341	72.412	11196.6	404.655	1.9061	8.05	26.0276	-0.943659	19.653	0.397421	0.779	68.7204
Georgia	2013	12.822	72.628	11544.5	370.463	3.47322	7.88	21.7001	-0.512058	19.416	0.463925	0.784	69.1943
Georgia	2014	12.782	73.099	12112	336.824	2.998	7.9	25.6504	3.06881	17.439	0.828558	0.793	77.4038
Georgia	2015	12.742	73.297	12334.7	271.719	3.165	7.42	26.8772	4.00358	16.506	0.700716	0.798	75.2381
Georgia	2016	12.702	73.569	12382.4	231.606	3.59387	8	28.9031	2.13493	16.604	0.712997	0.802	75.2381
Georgia	2017	7	73.57	12924.2	248.929	3.57443	7.06	25.1248	6.03532	13.939	0.758942	0.807	76.6667
Georgia	2018	7.063	73.341	13697.4	406.518	3.52106	7.11	27.9263	2.61524	12.667	0.724707	0.816	76.6667
Georgia	2019	7.125	73.47	14314.3	457.162	3.86667	6.66	27.1682	4.8529	11.565	0.716376	0.816	76.1905
Georgia	2020	7.188	72.765	13298.3	724.388	3.85	8.43	24.6057	5.20246	11.73	0.600856	0.807	70.9524
Georgia	2021	7.267	71.694	14489.4	591.276	3.63759	8.42	20.6789	9.56691	11.794	0.66119	0.809	73.8095
Georgia	2022	7.345	71.587	15952	298.484	3.81285	7.37	24.0667	11.8982	11.657	0.620238	0.814	72.1698
Ghana	2002	7.424	58.608	2813.44	526.133		2.88722	19.7	9.36093	8.698	-0.34279	0.506	43.9153
Ghana	2003	7.502	59.111	2879.31	568.831		2.8269	22.9369	29.773	7.722	-0.311427	0.51	46.0317
Ghana	2004	7.581	59.191	2951.44	1714.3	7.53558	2.76365	28.3775	18.0427	6.757	-0.279528	0.517	47.2906
Ghana	2005	7.372	59.76	3083.59	1078.96	7.42208	3.63137	29.0021	15.439	5.817	-0.368746	0.529	43.9024
Ghana	2006	7.164	59.988	3158.88	674.472	5.14794	3.67091	22.4658	11.6792	4.897	-0.0141816	0.537	56.0976
Ghana	2007	6.955	60.224	3212.67	684.089	5.51987	3.80249	15.3845	10.7343	5.092	0.0381477	0.547	57.767
Ghana	2008	6.746	60.49	3423.28	706.257	5.75796	3.87511	16.492	16.4946	5.142	-0.0774585	0.558	55.8252
Ghana	2009	6.538	60.946	3501.74	935.844	5.31744	4.37879	16.4318	19.2469	5.349	-0.00998761	0.563	58.8517
Ghana	2010	6.329	61.157	3640.64	970.663	5.5406	4.22399	13.1002	10.7334	5.384	0.0142805	0.571	58.0952
Ghana	2011	6.121	61.652	3992.13	958.153	8.14097	4.69264	12.81	8.72846	4.227	-0.0291263	0.579	56.3981
Ghana	2012	6.224	62.081	4165.3	920.048	7.91914	4.008	16.9677	11.1863	3.141	-0.126569	0.583	54.9763
Ghana	2013	6.328	62.42	4469.52	747.489	4.57647	4.59225	24.7715	11.6662	2.173	-0.0965914	0.587	55.4502
Ghana	2014	6.432	63.045	4380.78	619.421	4.39979	4.01644	27.1651	15.4896	4.412	-0.194919	0.582	52.4038
Ghana	2015	6.432	63.175	4473.41	714.078	4.43405	4.54297	27.7096	17.15	6.806	-0.210319	0.586	50.9524
Ghana	2016	6.432	63.89	4473.72	715.075	4.39453	3.39036	25.4557	17.4546	5.237	-0.175111	0.586	51.9048
Ghana	2017	1.473	64.013	4686.81	677.337	3.53363	3.73088	19.5655	12.3719	3.369	-0.25357	0.585	46.6667
Ghana	2018	1.487	64.122	4890.69	693.729	3.88613	3.80673	21.7093	7.80877	3.251	-0.138242	0.589	51.4286
Ghana	2019	1.5	64.74	5121.49	612.141	3.153	4.29848	18.6473	7.14364	3.156	-0.108894	0.599	52.381
Ghana	2020	1.514	64.114	5304.64	609.972	3.409	4.01752	18.2237	9.88729	3.285	-0.12723	0.601	50
Ghana	2021	1.528	63.795	5278.77	797.668	3.419	4.15177	17.0367	9.97109	3.338	-0.128527	0.6	50
Ghana	2022	1.541	63.945	5380.27	532.351	2.905		15.5217	31.2559	3.084	-0.0459955	0.602	52.8302
Guatemala	2002	4.609	68.386	6489.61	325.962		6.01301	20.8879	8.13263	2.748	-0.660022	0.561	33.3333
Guatemala	2003	4.801	68.797	6518.68	327.657		6.15307	20.6215	5.60348	2.807	-0.737128	0.566	27.5132
Guatemala	2004	4.896	69.165	6565.08	291.171		6.26183	21.1896	7.57862	2.971	-0.619751	0.57	30.0493
Guatemala	2005	5.837	69.168	6637.01	296.607		6.14826	20.0511	9.10865	3.06	-0.684204	0.574	29.2683
Guatemala	2006	4.934	69.812	6819.81	530.168	3.03285	6.36362	21.165	6.56085	2.95	-0.837903	0.58	21.4634
Guatemala	2007	5.121	70.1	7094.53	485.769	3.08809	6.19183	21.1696	6.82162	2.825	-0.769334	0.59	24.7573
Guatemala	2008	5.307	70.356	7251.73	473.129	3.23686	6.0813	16.6716	11.3558	2.874	-0.666637	0.599	29.6117
Guatemala	2009	5.494	70.641	7124.62	369.582		6.33939	13.2666	1.8591	3.209	-0.533482	0.606	36.3636
Guatemala	2010	5.681	70.878	7154.32	387.935	2.84865	6.12478	14.1642	3.85951	3.497	-0.540784	0.613	36.1905
Guatemala	2011	5.669	71.177	7297.9	309.221	2.96865	5.96307	15.4822	6.21412	3.171	-0.537248	0.617	36.019
Guatemala	2012	5.669	71.463	7437.35	295.323	3.00525	6.07317	15.1941	3.78181	2.765	-0.678763	0.62	28.91
Guatemala	2013	5.669	71.728	7557.66	327.592	2.88809	5.77189	15.8426	4.34337	3.017	-0.639011	0.623	31.7536
Guatemala	2014	6.122	71.964	7734.78	279.803	2.98562	5.88857	15.0712	3.41836	2.717	-0.756131	0.64	25.9615
Guatemala	2015	6.266	72.103	7932.54	269.774	3.03033	6.00602	14.8282	2.38872	2.506	-0.780903	0.629	24.2857
Guatemala	2016	6.409	72.355	8028.82	291.522	2.94474	6.07008	13.862	4.44844	2.583	-0.790915	0.633	23.3333
Guatemala	2017	6.552	72.551	8147.87	369.761	2.9501	6.13564	13.5961	4.42454	2.462	-0.787172	0.636	22.8571
Guatemala	2018	6.696	72.726	8296.05	398.299	3.13194	6.10663	13.7904	3.75186	2.283	-0.821695	0.64	22.8571
Guatemala	2019	6.839	73.129	8514.18	376.098	3.19297	6.17458	14.3298	3.69998	2.193	-0.915392	0.645	18.5714
Guatemala	2020	6.982	71.797	8240.39	326.434	3.29503	6.46693	13.5074	3.21444	2.953	-1.134	0.638	12.8571
Guatemala	2021	7.125	69.237	8716.45	441.92	3.10635	6.90083	16.8631	4.26105	2.174	-1.19214	0.63	11.9048
Guatemala	2022	7.269	68.674	8996.42	392.764	3.22941		16.6597	6.88513	3.051	-1.20975	0.629	11.3208
Guinea	2002	1.555	53.278	1788.52	190.929	2.59387	5.36402	9.97077		4.549	-0.767054	0.363	28.5714
Guinea	2003	1.569	53.678	1809.84	182.837	2.37102	4.78056	14.825		4.651	-0.888901	0.37	20.1058
Guinea	2004	1.582	54.117	1805.09	219.623	2.21	4.78468	14.2157		4.757	-0.887607	0.377	20.6897
Guinea	2005	1.655	54.632	1820.93	165.513	1.84906	4.04512	13.3977	31.3733	4.899	-1.07331	0.387	14.1463
Guinea	2006	1.727	55.108	1756.77	148.348		3.61522	24.5634	34.6953	4.958	-1.12154	0.394	11.2195
Guinea	2007	1.799	55.553	1833.68	133.037		3.46628	23.4197	18.1756	4.834	-1.29245	0.402	5.82524
Guinea	2008	1.872	56.044	1858.6	292.276	1.58112	3.26562	26.2177	23.0656	4.844	-1.21101	0.408	6.79612
Guinea	2009	2.452	56.348	1774.33	176.262	2.20725	3.58148	21.3066	4.68439	4.991	-1.09628	0.41	12.4402
Guinea	2010	3.032	56.72	1836.01	103.714	2.55119	3.42783	20.3254	15.0503	5.129	-1.22194	0.415	7.61905
Guinea	2011	2.581	57.019	1875.77	95.916	2.28742	3.78955	24.0533	21.3169	5.123	-1.12737	0.421	12.7962
Guinea	2012	2.129	57.406	1944.65	151.002	1.83371	3.50399	26.0215	15.2263	4.891	-1.05566	0.425	14.6919
Guinea	2013	2.241	57.791	1904.03	398.757	2.63421	3.46109	23.494	11.8876	4.977	-1.04976	0.43	13.7441
Guinea	2014	2.359	57.886	1960.62	208.548	2.42281	4.78799	22.8166	6.15051	5.108	-1.06706	0.436	13.4615
Guinea	2015	2.359	58.134	2018.61	218.323	2.51714	5.80919	24.1634	11.7801	5.251	-1.01426	0.449	15.2381
Guinea	2016	2.359	58.763	2177.56	286.208	2.5445	5.39695	52.6698	8.17268	5.019	-0.94654	0.466	15.2381
Guinea	2017	2.406	59.109	2371.89	208.031	2.32034	3.91513	22.2704	8.91436	4.815	-1.038	0.467	14.2857
Guinea	2018	2.489	59.349	2383.45	225.287	2.38432	3.73843	19.5473	9.82762	4.771	-1.05975	0.464	13.3333
Guinea	2019	2.572	59.72	2436.39	196.791	1.85813	4.08876	19.7286	9.47001	5.018	-0.915901	0.47	19.0476
Guinea	2020	2.655	59.327	2364.84	153.221	2.43267	3.87644	31.3182	10.6016	5.993	-0.974657	0.471	18.0952
Guinea	2021	2.759	58.892	2258.27	160.686	2.041	3.75557	29.3473	12.5973	5.767	-1.02239	0.467	17.1429
Guinea	2022	2.862	58.985	2404.17	176.737	1.986		29.8119	10.493	5.328	-1.00541	0.471	18.8679
Honduras	2002	5.582	69.366	3937.68	351.141		6.24458	24.2584	7.69051	4.02	-1.01955	0.561	15.873
Honduras	2003	5.518	69.507	3988.48	298.401		6.89005	25.2809	7.67417	5.3	-0.974429	0.565	15.873
Honduras	2004	5.847	69.796	4107.88	364.153		6.85484	29.6656	8.11379	5.99	-0.946082	0.57	18.7192
Honduras	2005	6.176	70.104	4273.27	880.052		7.50086	27.623	8.80906	4.909	-0.819756	0.575	22.439
Honduras	2006	6.294	70.261	4441.44	393.724		7.86319	28.3419	5.57775	3.575	-0.833332	0.579	21.9512
Honduras	2007	6.529	70.376	4684.99	343.236		8.08495	33.6653	6.93621	3.211	-0.791543	0.584	22.8155
Honduras	2008	6.408	70.441	4794.64	468.826		8.60363	36.066	11.4034	3.156	-0.915665	0.589	18.4466
Honduras	2009	6.288	70.911	4616.4	325.053		8.99592	20.5994	5.49634	3.292	-0.908243	0.592	20.0957
Honduras	2010	7.088	71.088	4574.17	305.253		8.72536	21.8798	4.69889	4.119	-0.88917	0.596	20.4762
Honduras	2011	7.296	71.439	4620.06	195.191		8.79187	26	6.76228	4.475	-0.833936	0.598	21.8009
Honduras	2012	7.296	71.734	4647.68	204.61	6.3	8.65655	24.5642	5.19619	3.755	-0.955132	0.596	18.0095
Honduras	2013	7.296	71.963	4691.3	226.27	5.87493	8.47723	21.7604	5.1619	5.646	-0.944874	0.602	18.0095
Honduras	2014	10.049	72.259	4693.28	233.447	7.09012	7.91456	22.1838	6.12925	7.078	-0.787136	0.603	24.0385
Honduras	2015	10.171	72.487	4830.83	249.753	6.41297	7.48379	25.118	3.15783	6.147	-0.589254	0.61	33.3333
Honduras	2016	10.292	72.588	4919.99	252.191	6.308	7.70944	23.3771	2.72461	6.727	-0.679066	0.615	29.0476
Honduras	2017	10.414	72.692	5114.51	265.083	5.744	7.00669	24.8207	3.93436	5.528	-0.739264	0.614	25.2381
Honduras	2018	10.536	72.814	5138.87	344.512	6.05647	7.22821	26.5721	4.34735	5.622	-0.656967	0.614	29.0476
Honduras	2019	10.657	72.881	5188.04	291.453	5.932	7.30498	22.9677	4.36587	5.551	-0.875686	0.629	21.4286
Honduras	2020	10.779	71.462	4682.74	227.767	5.976	9.0351	19.6664	3.46841	10.679	-0.988052	0.621	17.619
Honduras	2021	10.901	70.123	5089.14	314.377	5.811	9.16102	24.2309	4.48088	7.94	-1.09102	0.62	14.7619
Honduras	2022	11.022	70.728	5271.6	352.409	4.442		26.3262	9.08964	7.037	-1.00207	0.624	17.9245
India	2002	5.302	63.616	2682.47	1895.08		4.24	30.2513	4.29715	8.248	-0.555382	0.501	36.5079
India	2003	5.399	64.094	2841.68	1666.27	3.61341	4.01	30.8397	3.80586	8.397	-0.456321	0.514	40.7407
India	2004	5.496	64.524	3016.52	1741.6	3.35254	3.96	35.0965	3.76725	8.551	-0.448476	0.523	37.931
India	2005	5.593	64.996	3203	1643.13	3.18875	3.79	37.4283	4.24634	8.697	-0.363161	0.532	44.878
India	2006	5.691	65.412	3406.81	1627.43	3.14285	3.63	38.9985	5.79652	8.614	-0.274563	0.541	47.3171
India	2007	5.788	65.788	3627.06	1794.41		3.52	41.9508	6.37288	8.534	-0.39769	0.55	41.2621
India	2008	6.014	66.149	3679.71	2325.33		3.51	38.4224	8.34927	8.486	-0.339098	0.557	43.6893
India	2009	6.241	66.513	3913.92	2270.03	3.27825	3.49	39.2568	10.8824	8.406	-0.452406	0.562	39.2345
India	2010	6.281	66.909	4167.86	2801.56	3.37769	3.27	39.7856	11.9894	8.318	-0.463755	0.572	39.0476
India	2011	6.495	67.359	4335.66	2694.68	3.79618	3.25	39.5904	8.91179	8.222	-0.540836	0.586	35.545
India	2012	6.533	67.887	4498.07	2163.99	4.085	3.33	38.3474	9.479	8.156	-0.513968	0.594	36.4929
India	2013	6.571	68.46	4720.38	2642.2	3.84467	3.75	34.0232	10.0179	8.088	-0.517086	0.6	36.9668
India	2014	10.065	69.074	5011.62	2764.8	3.899	3.62	34.2678	6.66566	7.992	-0.457155	0.611	39.9038
India	2015	10.322	69.636	5349.58	3368.56	4.115	3.6	32.1167	4.90697	7.894	-0.406171	0.619	42.8571
India	2016	10.578	70.117	5672.45	2756.8	4.257	3.5	30.1727	4.94822	7.8	-0.336942	0.63	43.8095
India	2017	10.835	70.467	6045.97	3937.45	4.306	2.94	30.9822	3.32817	7.723	-0.291452	0.636	45.7143
India	2018	11.091	70.71	6367.37	3510.85	4.377	2.86	32.3432	3.93883	7.652	-0.229412	0.636	47.619
India	2019	11.348	70.91	6554.32	3904.97	3.897	2.95	30.0962	3.72951	6.51	-0.302205	0.638	44.7619
India	2020	11.422	70.15	6089.66	3403.6	4.293	3.34	28.9224	6.62344	7.859	-0.292916	0.638	44.2857
India	2021	11.495	67.24	6542.45	4593.6	4.635	3.28	32.1158	5.13141	6.38	-0.316494	0.633	44.7619
India	2022	11.569	67.744	6950.53	5141.34			33.0239	6.69903	4.822	-0.321811	0.644	44.8113
Indonesia	2002	7.515	67.134	5747.04	1601.36	2.64569	1.98063	21.4041	11.9001	6.604	-1.1373	0.614	8.46561
Indonesia	2003	7.609	67.413	5889.54	1978.67	3.218	2.24837	25.5985	6.75732	6.658	-0.979824	0.622	15.3439
Indonesia	2004	7.703	65.75	6060.29	1329.3	2.74847	2.12002	24.0564	6.06406	7.303	-0.976612	0.621	17.734
Indonesia	2005	7.797	67.649	6306.64	2578.38	2.87282	2.53189	25.0814	10.4532	7.945	-0.906052	0.634	18.5366
Indonesia	2006	7.914	67.914	6609.49	2380		2.61946	25.4002	13.1087	7.551	-0.864276	0.643	20.4878
Indonesia	2007	7.976	68.189	6947.97	2354.98	3.04425	2.82386	24.9203	6.40656	8.06	-0.630509	0.646	31.068
Indonesia	2008	8.24	68.226	7312.88	2619.39	2.9019	2.54842	27.8162	10.2267	7.209	-0.639086	0.649	32.5243
Indonesia	2009	8.162	68.494	7558.92	2621.7	3.52513	2.62324	30.9852	4.38642	6.106	-0.889641	0.66	20.5742
Indonesia	2010	8.359	68.679	7986.46	2609.36	2.81228	2.79088	32.8801	5.1342	5.614	-0.803535	0.667	21.9048
Indonesia	2011	8.557	68.823	8362.94	1850.05	3.18944	2.98942	32.9843	5.35605	5.153	-0.755871	0.674	23.6967
Indonesia	2012	8.557	68.973	8757.03	1652.07	3.40748	2.91427	35.0716	4.2795	4.468	-0.689106	0.682	28.436
Indonesia	2013	8.557	69.264	9117.76	1922.53	3.35904	2.86935	33.8314	6.41251	4.336	-0.66004	0.687	29.3839
Indonesia	2014	4.298	69.533	9432.09	1874.84	3.28801	2.96434	34.6003	6.39493	4.049	-0.597599	0.69	32.2115
Indonesia	2015	4.375	69.699	9788.56	1998.56	3.5836	2.92429	34.0628	6.36312	4.514	-0.518548	0.698	36.6667
Indonesia	2016	4.452	69.798	10186	2049.42	3.56997	3.02147	33.8587	3.52581	4.301	-0.462464	0.701	38.0952
Indonesia	2017	4.529	69.936	10595.2	2119.26	2.66998	2.90417	33.7106	3.8088	3.783	-0.304816	0.708	45.2381
Indonesia	2018	4.637	70.338	11055.2	3058.25	2.75423	2.86758	34.5706	3.19835	4.387	-0.29946	0.712	44.2857
Indonesia	2019	4.744	70.518	11498	1351.72	2.84208	2.87863	33.7801	3.03059	3.59	-0.47318	0.718	35.2381
Indonesia	2020	4.851	68.808	11205.5	3066.45	3.48982	3.42067	32.3434	1.92097	4.255	-0.454077	0.712	36.6667
Indonesia	2021	4.958	67.57	11531.4	2176.99	3.04652	3.70636	31.4489	1.56013	3.827	-0.449075	0.707	36.6667
Indonesia	2022	5.065	68.25	12045.6	2233.27	2.42013		29.7459	4.20946	3.462	-0.434911	0.713	37.2642
Iran, Islamic Rep.	2002	9.798	70.445	11915.8	110.448	4.48488	4.65182	39.0541	14.3359	12.8	-0.21806	0.708	49.7355
Iran, Islamic Rep.	2003	9.885	69.823	12812.1	140.233	4.36322	4.95589	42.1053	16.468	11.528	-0.311087	0.713	46.5608
Iran, Islamic Rep.	2004	10.044	71.37	13103.4	172.285	4.29663	5.12801	45.9988	14.7615	10.3	-0.359163	0.722	42.8571
Iran, Islamic Rep.	2005	10.116	71.838	13300.5	104.998	4.05651	5.29996	38.7177	13.4331	11.813	-0.477626	0.727	40.4878
Iran, Islamic Rep.	2006	10.215	72.276	13787.8	107.954	4.28999	5.15991	38.6491	10.0159	11.519	-0.484105	0.738	38.0488
Iran, Islamic Rep.	2007	10.314	72.772	14739.2	93.7016	4.59681	4.91188	39.7289	17.341	10.772	-0.556039	0.742	34.9515
Iran, Islamic Rep.	2008	10.42	72.624	14584	81.7972	3.91376	5.0399	41.7575	25.4105	10.63	-0.755061	0.744	26.2136
Iran, Islamic Rep.	2009	10.528	72.698	14468.9	86.1466	3.84245	6.11493	40.8982	13.5516	12.113	-0.767309	0.748	23.9234
Iran, Islamic Rep.	2010	10.636	73.069	15102.6	95.3947	3.70918	6.29153	40.2624	10.0894	13.679	-0.948634	0.756	17.619
Iran, Islamic Rep.	2011	10.746	73.679	15316.2	90.9906	3.48497	6.09788	36.0168	26.2934	12.491	-0.880579	0.765	20.3791
Iran, Islamic Rep.	2012	10.746	74.186	14650.9	103.934	2.939	6.12235	36.351	27.2568	12.275	-0.797347	0.78	23.2227
Iran, Islamic Rep.	2013	10.746	74.449	14217.5	99.1406	2.85279	5.54722	34.9452	36.603	10.595	-0.693659	0.78	28.436
Iran, Islamic Rep.	2014	5.821	74.782	14620.2	100.374	2.61669	6.3524	36.9397	16.6066	10.68	-0.625268	0.783	30.7692
Iran, Islamic Rep.	2015	5.903	75.124	14020.7	110.097	2.62911	7.53312	31.9824	12.4847	11.166	-0.633904	0.782	30.9524
Iran, Islamic Rep.	2016	5.985	75.6	14986	117.017	3.17397	7.99203	29.1092	7.24543	12.618	-0.739657	0.785	26.6667
Iran, Islamic Rep.	2017	6.067	75.971	15181.9	135.632	3.45957	7.83455	31.7965	8.04492	12.232	-0.838276	0.788	20.4762
Iran, Islamic Rep.	2018	6.149	76.195	14698.8	141.705	3.61979	7.73915	33.2091	18.0141	12.195	-0.984159	0.787	15.7143
Iran, Islamic Rep.	2019	6.227	76.103	14203	160.925	3.25775	6.27399	37.2993	39.9073	10.74	-1.07133	0.785	13.3333
Iran, Islamic Rep.	2020	6.304	74.832	13925.4	172.324	3.20495	5.4015	42.2489	30.5941	9.687	-1.11074	0.779	14.2857
Iran, Islamic Rep.	2021	6.382	73.875	14477.7	206.546		5.77014	39.4526	43.389	9.282	-1.11569	0.776	13.3333
Iran, Islamic Rep.	2022	6.46	74.556	14770.3	231.675	2.66998		38.0016	43.4885	9.085	-1.12637	0.78	14.6226
Jamaica	2002	8.439	70.888	9156.4	119.009	5.37523	4.74544	27.3377	7.07635	6.654	-0.511592	0.669	38.0952
Jamaica	2003	8.526	70.806	9458.06	73.2612	4.25685	4.22014	26.2476	10.087	6.563	-0.43517	0.665	41.2698
Jamaica	2004	8.613	70.86	9548.91	96.179	3.91255	4.80435	26.4672	13.5545	6.562	-0.393378	0.68	41.3793
Jamaica	2005	8.701	71.044	9599.87	116.667	4.61642	4.54582	26.9424	15.0529	6.596	-0.34286	0.685	46.3415
Jamaica	2006	8.79	71.199	9843.11	73.0205		4.20788	28.4225	8.56106	6.619	-0.291285	0.695	46.3415
Jamaica	2007	8.88	71.418	9949.92	54.386	5.49022	5.32058	26.5712	9.24482	6.614	-0.338424	0.703	46.6019
Jamaica	2008	8.97	71.612	9959.39	62.4361	6.19132	5.61143	24.3505	22.0228	6.666	-0.3367	0.712	44.1748
Jamaica	2009	9.062	72.124	9353.5	65.6755	6.19848	5.14654	21.0563	9.59225	7.314	-0.321955	0.712	47.8469
Jamaica	2010	9.155	72.622	9343.56	54.4008	6.3706	5.29519	20.2065	12.6106	7.63	-0.265739	0.711	48.0952
Jamaica	2011	9.248	73.094	9482.99	52.8814	6.26664	5.23845	21.4363	7.55586	8.034	-0.187364	0.715	53.0806
Jamaica	2012	9.248	73.433	9583.95	55.6789	6.11246	4.88513	19.9332	6.87398	8.695	-0.285973	0.716	48.3412
Jamaica	2013	9.248	73.412	9497.81	52.3811	6.25108	4.95443	21.2599	9.3415	9.698	-0.304273	0.715	47.3934
Jamaica	2014	7.654	72.982	9542.93	53.3288	6.01586	5.16564	22.4738	8.27408	9.046	-0.325509	0.714	46.1538
Jamaica	2015	7.8	72.394	9501.73	55.8283	5.45521	5.6247	21.3519	3.69154	8.824	-0.283773	0.712	48.5714
Jamaica	2016	8.145	72.02	9490.39	48.7385	5.31461	5.70102	21.2882	2.35102	8.634	-0.208374	0.71	49.5238
Jamaica	2017	8.49	71.911	9700.66	60.7468	5.26017	6.14859	22.5318	4.3784	7.399	-0.224058	0.711	47.619
Jamaica	2018	8.834	71.793	9775.62	76.8701	5.41381	5.96799	23.3115	3.73664	5.47	-0.230747	0.711	47.1429
Jamaica	2019	9.179	71.767	9957.95	82.3691	5.16364	6.09761	24.2691	3.9051	4.987	-0.113834	0.712	51.9048
Jamaica	2020	9.524	71.869	8908.34	43.5185	5.617	6.6258		5.22678	6.501	-0.0465458	0.707	53.8095
Jamaica	2021	9.565	70.5	9328.31	50.0466	5.63124	7.18521		5.86278	5.188	-0.0529802	0.704	52.381
Jamaica	2022	9.606	70.629	9694.52	66.3398	5.35435			10.3496	4.083	-0.0233815	0.706	53.7736
Jordan	2002	9.76	72.359	9449.94	668.4		9.27864	20.0957	1.83299	15.3	-0.062323	0.691	55.0265
Jordan	2003	9.914	72.573	9669.72	1701.8		8.78901	20.8405	1.63	14.5	0.333169	0.697	67.7249
Jordan	2004	10.068	72.772	10352.1	695.048		8.74671	27.3839	3.36187	14.619	0.290118	0.707	64.0394
Jordan	2005	10.222	72.932	10935.9	697.21		8.49442	34.1478	3.49369	14.8	0.280934	0.713	63.4146
Jordan	2006	10.376	73.145	11084.7	604.98		7.67926	28.3399	6.25172	14	0.279344	0.719	64.3902
Jordan	2007	10.53	73.373	11361.7	569.913		7.90983	30.268	4.74391	13.1	0.287264	0.716	64.0777
Jordan	2008	10.684	73.591	11794.5	681.681		8.48881	36.0507	13.9712	12.7	0.380167	0.726	67.4757
Jordan	2009	10.351	73.801	12083.2	761.918		9.22397	32.5395	-0.73907	12.9	0.16473	0.728	62.6794
Jordan	2010	10.399	74	11817.5	666.179		8.17026	35.0376	4.84552	12.5	0.0383147	0.727	60
Jordan	2011	10.447	74.189	11823.3	744.374		8.14808	31.7477	4.16244	12.9	0.0994421	0.73	59.7156
Jordan	2012	10.447	74.366	11899.6	1104.5		7.818	31.0322	4.51523	12.2	0.0705866	0.736	60.1896
Jordan	2013	10.447	74.562	11472.1	1001.21		7.16592	26.5997	4.82462	12.6	0.0659094	0.738	59.7156
Jordan	2014	12.174	74.789	10525	1870.13		7.20893	25.8086	2.89948	11.9	0.135434	0.737	60.5769
Jordan	2015	12.219	75.011	9838.66	1818.8		7.46096	24.835	-0.876851	13.075	0.244418	0.738	62.381
Jordan	2016	12.263	75.215	9595.58	2227.36	3.45282	6.97644	23.4044	-0.77843	15.275	0.250655	0.74	61.9048
Jordan	2017	12.307	75.502	9581.24	2221.89	3.21306	7.10954	24.7174	3.32389	18.12	0.22701	0.744	61.9048
Jordan	2018	12.352	75.774	9541.2	2338.94	2.95462	6.98295	24.3624	4.46231	18.257	0.123944	0.742	58.5714
Jordan	2019	12.396	76.044	9556.64	2459.47	2.98846	6.99518	21.4134	0.761514	16.801	0.0804249	0.744	58.5714
Jordan	2020	12.441	75.184	9182.78	2480.02		7.0382	21.4585	0.333294	19.213	0.0385519	0.74	57.619
Jordan	2021	12.485	74.256	9179.68	2413.63	3.22044	7.28875	25.1778	1.34609	19.837	0.026835	0.736	55.7143
Jordan	2022	12.53	74.215	9294.8	1284.43	3.24027			4.22916	18.2	0.0730472	0.736	58.0189
Kazakhstan	2002	11.342	65.95	12765.1	204.134	3.0297	3.61	27.2877	5.83692	9.33	-1.11358	0.706	8.99471
Kazakhstan	2003	11.506	65.74	13734.7	237.024		3.72	25.7039	6.43822	8.78	-1.02652	0.717	11.6402
Kazakhstan	2004	11.67	66.06	14758.7	219.507	2.25591	3.98	26.3111	6.88205	8.4	-1.10595	0.729	12.3153
Kazakhstan	2005	11.834	65.86	15396.2	163.886	2.26353	3.9	30.9698	7.58	8.13	-1.01496	0.739	16.5854
Kazakhstan	2006	11.998	66.15	16317.2	122.822	2.62678	3.4	33.9008	8.72169	7.79	-0.995143	0.75	18.0488
Kazakhstan	2007	12.069	66.34	17274.6	180.596	2.83139	2.7	35.5267	10.8468	7.26	-0.992245	0.757	17.9612
Kazakhstan	2008	12.139	67.11	16779.2	296.107	2.58946	3.05	27.5065	17.1399	6.63	-0.980641	0.757	16.0194
Kazakhstan	2009	12.21	68.39	17769.2	207.006	3.06072	3.5	29.4146	7.31608	6.55	-0.931519	0.76	19.1388
Kazakhstan	2010	12.321	68.45	17976.3	147.482	3.46226	2.74	25.3735	7.40046	5.77	-1.00106	0.766	16.6667
Kazakhstan	2011	12.433	68.69	18264.1	71.0094	3.49352	2.6	22.9981	8.4529	5.39	-0.996685	0.774	17.5355
Kazakhstan	2012	12.433	69.52	19217.2	78.8561	3.90169	3.04	25.2297	5.19568	5.29	-0.921266	0.781	18.9573
Kazakhstan	2013	12.433	70.62	21069	93.196	3.437	2.66	24.5696	5.94284	5.2	-0.930915	0.789	18.9573
Kazakhstan	2014	5.662	71.44	21752.9	66.117	3.42165	2.97	25.7902	6.84945	5.06	-0.825429	0.794	23.5577
Kazakhstan	2015	5.778	71.97	23136.9	59.2186	2.78858	3.04	27.9079	6.67829	4.93	-0.871415	0.799	20.9524
Kazakhstan	2016	5.893	72.41	22005.1	77.3338	2.9781	3.42	27.8276	14.3611	4.96	-0.831907	0.797	21.9048
Kazakhstan	2017	6.009	72.95	22157.9	59.0588	2.75082	3.05	26.3525	7.44266	4.9	-0.839266	0.802	20
Kazakhstan	2018	6.085	73.15	22171.8	57.0378	2.61595	2.82	25.2582	6.16366	4.85	-0.492077	0.804	37.619
Kazakhstan	2019	6.162	73.18	22786.6	57.7509	2.85697	2.79	27.6276	5.33356	4.8	-0.285695	0.81	45.2381
Kazakhstan	2020	6.238	71.37	23303.7	59.1289	4.446	3.75	28.8069	6.71815	4.89	-0.377907	0.806	40.9524
Kazakhstan	2021	6.314	70.23	22601.7	57.3972	4.386	3.92	26.5334	8.04147	5.556	-0.25916	0.801	47.1429
Kazakhstan	2022	5.818	74.44	22586.8	58.4807	4.205		24.1223	15.0279	4.86	-0.185301	0.802	48.5849
Kenya	2002	6.06	54.99	3217.05	426.275	6.172	3.84692	15.1382	1.96131	2.903	-1.00375	0.49	16.9312
Kenya	2003	6.302	55.601	3209.08	500.445	6.49427	4.05871	16.4821	9.81569	2.86	-0.964617	0.501	16.9312
Kenya	2004	6.544	56.361	3280.83	590.359	6.79693	4.23646	16.9625	11.624	2.836	-0.89788	0.513	20.197
Kenya	2005	6.785	57.344	3398.43	616.805	7.33565	4.24245	17.6497	10.3128	2.739	-1.01254	0.521	17.0732
Kenya	2006	7.027	58.222	3504.41	929.558	7.04984	5.1127	18.6336	14.4537	2.678	-0.935451	0.531	19.5122
Kenya	2007	7.269	58.865	3629.12	1023.36		5.22106	20.457	9.75888	2.65	-0.978595	0.54	18.4466
Kenya	2008	7.511	59.614	3542.69	1178.02		5.28901	19.6127	26.2398	2.752	-1.06837	0.546	14.0777
Kenya	2009	7.753	60.365	3098.18	1482.87	4.02	5.26973	19.0192	9.23413	2.813	-1.07073	0.546	15.7895
Kenya	2010	7.995	60.649	3286.19	1425.17	4.81549	5.3885	21.264	3.96139	2.793	-0.911055	0.545	19.5238
Kenya	2011	7.686	61.046	3445.49	1778.4	4.70013	5.20213	21.8858	14.0225	2.706	-0.963742	0.552	18.4834
Kenya	2012	7.686	61.115	3480.59	2145.44	4.93121	5.01806	22.1934	9.37777	2.686	-1.09888	0.557	12.7962
Kenya	2013	7.686	61.389	3500.86	2250.95	4.83721	4.931	22.405	5.71749	2.764	-1.03594	0.562	14.6919
Kenya	2014	10.462	61.816	3608.41	1838.74	4.7173	4.91267	24.9507	6.87815	2.768	-0.938905	0.569	16.3462
Kenya	2015	10.519	61.892	3755.29	1819.16	4.7435	4.7644	22.1034	6.58215	2.763	-1.03067	0.575	14.2857
Kenya	2016	10.576	62.163	4187.57	1785.51	4.89518	4.75429	19.3484	6.29725	2.757	-0.913664	0.586	16.6667
Kenya	2017	10.633	62.481	4230.84	1886.09	4.96309	3.98598	20.6635	8.00565	3.54	-0.975331	0.591	15.2381
Kenya	2018	10.691	62.676	4397.48	1817.7	5.10762	4.09903	19.376	4.68981	4.284	-0.862696	0.598	20
Kenya	2019	10.748	62.943	4527.73	1709.61		4.36875	19.3418	5.23964	5.014	-0.807419	0.604	24.2857
Kenya	2020	10.805	62.675	4419.66	1670.01	4.62816	4.47622	19.6516	5.40516	5.621	-0.876584	0.599	20.9524
Kenya	2021	10.862	61.427	4665.8	1540.32		4.54763	20.3912	6.10794	5.693	-0.735883	0.596	26.1905
Kenya	2022	10.962	62.055	4807.72	1470.92			19.1602	7.65986	5.805	-0.759701	0.601	24.0566
Kyrgyz Republic	2002	11.061	68.1561	3069.61	135.685	4.44546	4.59	17.6067	2.13421	2.07	-1.06477	0.627	10.0529
Kyrgyz Republic	2003	11.16	68.2561	3262.04	142.667	4.47542	5.82	11.83	2.97461	2.165	-1.03282	0.635	11.1111
Kyrgyz Republic	2004	11.26	68.1537	3396.48	131.588	4.62244	6.2	14.4884	4.11065	2.26	-1.09771	0.638	12.8079
Kyrgyz Republic	2005	11.359	67.9561	3394.23	191.459	4.87384	7.45	16.4182	4.33867	2.358	-1.26727	0.64	8.78049
Kyrgyz Republic	2006	11.458	67.6951	3533.27	157.721	5.54986	8.31	24.1958	5.55212	2.462	-1.32556	0.646	6.82927
Kyrgyz Republic	2007	11.558	67.8951	3813.74	129.964	6.467	6.93	26.643	10.2301	2.558	-1.3291	0.652	4.85437
Kyrgyz Republic	2008	11.657	68.4512	3978.48	159.448	5.91319	6.53	28.949	24.5201	2.639	-1.23224	0.657	5.82524
Kyrgyz Republic	2009	11.757	69.1024	4053.89	148.884	6.23268	6.9	27.2704	6.83656	2.738	-1.31283	0.661	4.30622
Kyrgyz Republic	2010	11.858	69.3	3889.74	173.429	5.81883	6.95	27.4016	7.96772	2.856	-1.1751	0.661	10.4762
Kyrgyz Republic	2011	11.961	69.6024	3867.14	180.016	6.79062	7.11	25.473	16.6363	2.962	-1.23197	0.664	6.63507
Kyrgyz Republic	2012	11.961	70.0024	4160.45	149.744	7.38423	8.51	34.9611	2.76844	3.07	-1.15086	0.673	11.3744
Kyrgyz Republic	2013	11.961	70.2024	4379.8	169.924	6.7802	8.19	33.8988	6.61375	3.146	-1.162	0.68	11.3744
Kyrgyz Republic	2014	3.494	70.4024	4540.28	186.989	5.5316	7.36	36.7567	7.53425	3.253	-1.12937	0.686	12.5
Kyrgyz Republic	2015	3.557	70.6512	4632.77	190.306	5.98551	7.15	34.6715	6.50332	3.346	-1.17861	0.689	10.9524
Kyrgyz Republic	2016	3.62	70.9512	4659.19	156.653	6.58615	6.41	33.9392	0.388838	3.466	-1.10431	0.692	12.381
Kyrgyz Republic	2017	3.683	71.2	4803.23	173.575	6.02619	6.19	32.9021	3.17531	3.568	-1.07847	0.695	12.8571
Kyrgyz Republic	2018	3.804	71.4	4980.64	149.736	5.55267	5.01	36.0166	1.54266	3.673	-0.960398	0.698	16.1905
Kyrgyz Republic	2019	3.925	71.6	4756.63	157.459	5.36675	4.49	34.4463	1.13362	4.252	-0.959892	0.699	17.1429
Kyrgyz Republic	2020	4.03	71.8	4566.18	143.074	6.09391	5.26	25.0305	6.32542	4.63	-1.12447	0.691	13.3333
Kyrgyz Republic	2021	3.937	71.9	4542.39	156.168	6.531	5.44	26.4937	11.905	4.096	-1.14972	0.696	12.8571
Kyrgyz Republic	2022	3.869	72.0488	4781.69	152.496	7.959		35.6407	13.9229	4.055	-1.23003	0.701	10.3774
Lao PDR	2002	5.378	59.534	2927.22	165.927	2.82522	3.69751	29.0404	10.6313	1.785	-0.67378	0.489	32.8042
Lao PDR	2003	5.479	60.031	3001.76	196.656		4.47921	27.7715	15.4894	1.646	-0.866406	0.498	22.2222
Lao PDR	2004	5.572	60.293	3218.96	177.349	2.413	3.54057	31.7542	10.4623	1.503	-1.14759	0.506	11.33
Lao PDR	2005	5.666	60.98	3446.87	167.61	2.41409	3.33673	34.0581	7.16542	1.35	-1.31761	0.516	6.82927
Lao PDR	2006	5.76	61.493	3254.61	217.086	2.95879	2.93201	30.0695	6.54559	1.198	-1.33153	0.517	5.85366
Lao PDR	2007	5.853	62.084	3868.85	233.256	3.07842	3.15346	32.3122	4.66197	1.066	-1.28131	0.531	6.79612
Lao PDR	2008	5.947	62.603	4054.78	212.661	2.27855	2.76727	31.682	7.62881	0.941	-1.20606	0.539	7.28155
Lao PDR	2009	5.947	63.273	4377.11	248.52	1.65485	3.463	33.9385	0.141188	0.833	-1.24884	0.549	5.74163
Lao PDR	2010	5.947	63.973	4494.57	256.065	1.70979	2.91155	27.4625	5.98255	0.708	-1.19573	0.557	9.04762
Lao PDR	2011	7.967	64.736	4763.41	241.888	1.70802	1.94458	28.0678	7.56899	1.055	-1.19297	0.569	9.95261
Lao PDR	2012	8.014	65.355	5110.44	251.584	1.82147	2.07638	32.5043	4.25513	1.398	-1.02507	0.578	15.6398
Lao PDR	2013	8.061	65.718	5477.82	250.843	3.23381	2.39985	30.6473	6.37143	1.755	-0.940361	0.587	18.4834
Lao PDR	2014	8.109	66.361	5874.4	297.53	2.93781	2.29846	29.8014	4.12924	2.117	-0.853412	0.597	21.1538
Lao PDR	2015	8.157	66.67	6210.05	368.716	2.737	2.45366	31.5567	1.27735	2.491	-0.944023	0.604	17.619
Lao PDR	2016	8.205	67.167	6556.08	267.055	2.774	2.36087	29.0077	1.59691	2.88	-0.986316	0.61	14.7619
Lao PDR	2017	8.253	67.434	6830.67	304.725	2.498	2.52607		0.825479	3.269	-0.967065	0.612	15.7143
Lao PDR	2018	8.302	67.634	7219.5	379.42	2.335	2.2463		2.04039	2.896	-0.997077	0.613	15.2381
Lao PDR	2019	8.351	68.138	7386.42	342.727	2.122	2.60312		3.32256	2.528	-1.07637	0.617	12.8571
Lao PDR	2020	8.4	68.497	7504	315.107	1.916	2.05965		5.10407	2.314	-1.08249	0.616	14.7619
Lao PDR	2021	8.449	68.061	7646.72	324.42	1.859	2.74392		3.75562	1.997	-1.05485	0.615	15.2381
Lao PDR	2022	8.497	68.999	7744.84	368.768	1.394			22.9562	1.209	-0.965779	0.62	19.8113
Lesotho	2002	7.021	45.595	2724.22	38.7349	10.1004	6.54459		33.8126	16.045	-0.173949	0.449	50.7937
Lesotho	2003	7.186	44.53	2827.86	39.5364	13.2196	6.04551		6.62916	16.019	-0.170023	0.45	52.381
Lesotho	2004	7.363	43.711	2810.75	38.5796	11.109	6.05739		5.02342	16.121	-0.106747	0.448	53.202
Lesotho	2005	7.545	43.233	2695.3	38.8472	12.0797	5.44927		3.43788	15.994	0.0550843	0.447	57.561
Lesotho	2006	7.545	42.914	2703.86	41.4604	11.2713	6.11966		6.07272	16.02	0.0105841	0.444	57.0732
Lesotho	2007	7.545	43.123	2980.87	66.0528		7.22255	24.9246	8.01244	15.905	-0.0582024	0.45	55.3398
Lesotho	2008	11.321	43.566	3062.25	64.7232	12.3295	7.66656	27.9814	10.7157	15.812	0.0618668	0.453	59.2233
Lesotho	2009	11.505	44.034	2888.06	77.0484		8.95305	30.5382	-16.8597	16.089	0.171798	0.457	63.1579
Lesotho	2010	11.689	45.596	2963.31	111.546		7.64089	31.3012	-2.40524	16.044	0.184215	0.47	62.8571
Lesotho	2011	11.874	46.692	2887.77	164.535	8.17	9.07559	25.3316	5.03663	16.098	0.156146	0.478	62.5592
Lesotho	2012	12.015	47.835	2945.45	187.634	7.67	10.0439	35.7206	6.05144	15.733	0.126534	0.489	60.6635
Lesotho	2013	12.159	49.002	2931.93	227.994	7.29	10.9959	32.6667	4.86512	15.907	0.279654	0.494	63.981
Lesotho	2014	12.299	50.033	2878.35	59.4077	7.2	9.9993	34.0968	5.37029	16.056	0.199733	0.5	61.5385
Lesotho	2015	12.323	51.101	2959.84	43.8751	8.686	9.29656	30.4366	3.21845	16.223	0.023092	0.508	56.6667
Lesotho	2016	12.458	52.264	3064.06	74.2524	7.802	9.24261	28.776	6.5965	16.139	-0.0519301	0.518	55.2381
Lesotho	2017	12.574	53.064	2920.96	93.7002	8.15532	10.5748	22.2056	4.4477	16.391	-0.0582799	0.522	55.2381
Lesotho	2018	12.564	53.733	2821.93	106.472	7.28361	11.115	21.4473	4.7518	16.637	-0.136426	0.525	51.9048
Lesotho	2019	12.588	54.173	2824.24	70.2692	7.194	11.9466	26.7945	5.18708	16.876	-0.123689	0.528	51.4286
Lesotho	2020	12.802	54.693	2741.09	95.802	6.998	10.2793	26.2742	4.9781	18.351	-0.141579	0.53	49.0476
Lesotho	2021	12.955	53.062	2721.56	97.7929	7.507	10.2137	28.5334	6.04775	18.129	-0.346613	0.522	42.8571
Lesotho	2022	13.105	53.036	2708.73	86.3667	6.433		28.3616	8.2718	16.668	-0.357248	0.521	41.0377
Madagascar	2002	6.785	58.892	1349.74	172.834	2.23179	4.92548	10.9702	16.4985	5.52	0.00122348	0.442	56.6138
Madagascar	2003	7.096	59.491	1439.52	340.356	2.61095	5.00277	13.7246	-1.704	5.01	-0.208431	0.451	50.2645
Madagascar	2004	7.422	60.149	1476.59	760.53	2.81262	5.2509	21.151	13.9558	3.952	-0.323701	0.459	44.335
Madagascar	2005	7.762	60.57	1492.36	683.955	3.30964	5.21558	19.3271	18.3638	2.62	-0.0555556	0.464	55.122
Madagascar	2006	7.762	61.315	1524.08	304.514	2.83097	5.07204	20.3113	10.7656	2.945	-0.182528	0.469	51.7073
Madagascar	2007	7.762	61.757	1585.97	401.531	2.90274	4.60866	26.5179	10.288	3.2	-0.186033	0.477	51.9417
Madagascar	2008	6.976	62.142	1644.94	293.1	2.55434	4.08112	38.7461	9.29651	3.428	-0.266752	0.485	49.0291
Madagascar	2009	7.132	62.734	1525.7	255.733	2.82513	4.3847	37.2219	8.95422	3.883	-0.328544	0.488	46.89
Madagascar	2010	7.288	62.873	1486.93	243.975	2.585	4.69763	27.0274	9.24732	4.28	-0.417825	0.488	42.381
Madagascar	2011	7.485	63.494	1467.54	234.585	2.38168	4.52159	23.3512	9.48254	2.518	-0.48461	0.49	38.8626
Madagascar	2012	7.872	63.544	1449.11	199.639	2.34067	3.91106	20.1689	5.71384	0.599	-0.670311	0.492	29.3839
Madagascar	2013	7.882	63.962	1439.94	334.427	1.77694	3.75156	16.5129	5.82643	0.995	-0.763889	0.494	23.2227
Madagascar	2014	7.949	64.255	1460.25	200.846	2.38123	4.4624	16.4907	6.08041	1.385	-0.842871	0.497	21.6346
Madagascar	2015	8.137	64.339	1450.17	363.937	2.21012	5.00625	15.9919	7.40419	1.785	-0.880012	0.499	20
Madagascar	2016	8.005	64.997	1464.43	301.294	2.68719	5.33249	16.366	6.03576	1.944	-0.934489	0.501	16.1905
Madagascar	2017	8.247	65.094	1499.25	275.192	2.701	4.80226	15.8064	8.60905	2.113	-1.07452	0.502	13.3333
Madagascar	2018	8.49	65.27	1503.65	310.424	2.8441	4.22847	20.703	8.59423	2.289	-1.02054	0.502	14.7619
Madagascar	2019	8.357	65.882	1530.06	299.854	3.013	3.10129	22.684	5.61051	2.46	-1.05221	0.498	14.7619
Madagascar	2020	8.403	65.182	1393.18	345.428	3.254	3.72316	17.7153	4.20179	3.246	-1.00964	0.486	16.6667
Madagascar	2021	8.602	64.485	1454.43	427.162	3.198	3.50452	15.0978	5.81225	3.415	-0.952459	0.484	18.5714
Madagascar	2022	8.6	65.23	1463.55	450.767	3.139		20.6658	8.16059	3.186	-1.00865	0.487	19.3396
Malaysia	2002	1.403	73.563	15142.3	115.799	7.65793	2.66877	24.7773	1.80787	3.48	0.246729	0.725	64.0212
Malaysia	2003	1.435	73.796	15838.7	204.151	7.50288	2.92417	22.7634	1.08968	3.61	0.31572	0.73	67.1958
Malaysia	2004	1.467	73.898	16512.3	352.133	5.92389	2.86017	23.0496	1.42127	3.54	0.323187	0.731	64.532
Malaysia	2005	1.498	74.096	17166	175.223		2.78693	22.3964	2.97507	3.53	0.17008	0.728	59.5122
Malaysia	2006	1.53	74.164	17986.9	307.771	4.48576	3.10898	22.7035	3.60924	3.32	0.213226	0.732	62.439
Malaysia	2007	1.585	74.211	18861.5	323.168	4.37254	3.07041	23.4095	2.02735	3.23	0.166801	0.744	60.6796
Malaysia	2008	1.64	74.25	19156	219.193	3.95852	3.00693	21.4583	5.44078	3.32	-0.0905064	0.754	54.8544
Malaysia	2009	1.574	74.227	18734.7	222.917	5.97418	3.26106	17.8357	0.583308	3.66	-0.0939427	0.761	55.5024
Malaysia	2010	1.508	74.442	19501.5	154.052	4.96645	3.16474	23.3865	1.62285	3.39	0.0570844	0.768	60.9524
Malaysia	2011	1.443	74.746	20382.7	171.576	5.76294	3.31452	23.1883	3.17447	3.05	0.0225716	0.771	57.8199
Malaysia	2012	1.377	74.944	20862.5	173.206	5.73903	3.45786	25.7486	1.66357	3.1	0.213313	0.777	63.5071
Malaysia	2013	1.312	75.035	21605.8	147.114	5.4812	3.51277	25.9371	2.10501	3.16	0.333291	0.782	67.2986
Malaysia	2014	1.246	75.146	22568.7	108.811	5.029	3.71037	24.9776	3.14299	2.88	0.396689	0.787	66.3462
Malaysia	2015	1.294	75.094	23494.5	107.208	4.704	3.82201	25.4243	2.10439	3.1	0.181794	0.792	60.4762
Malaysia	2016	1.341	75.289	24178.2	74.4185	4.346	3.70085	25.9955	2.09057	3.44	0.0275785	0.798	57.619
Malaysia	2017	1.341	75.476	25204.5	76.2452	4.185	3.71472	25.5473	3.8712	3.41	-0.00590146	0.8	55.7143
Malaysia	2018	1.341	75.644	26002.1	63.803	4.132	3.75944	23.8974	0.884709	3.3	0.300331	0.802	62.8571
Malaysia	2019	4.725	75.76	26950.9	89.8476	3.98	3.83991	21.0482	0.662892	3.26	0.233308	0.805	60.9524
Malaysia	2020	4.933	75.938	25314.3	59.0487	4.52	4.08395	19.658	-1.1387	4.54	0.22911	0.802	60.4762
Malaysia	2021	5.142	74.884	25619.2	73.3427	4.271	4.38381	22.1068	2.4771	4.64	0.146786	0.798	59.0476
Malaysia	2022	5.351	76.26	27295.4	45.5495	3.506		23.5062	3.3787	3.93	0.249184	0.807	62.2642
Mali	2002	3.244	52.222	1670.31	367.879	2.89623	4.99774	15.7458	5.03282	1.297	-0.724598	0.336	30.6878
Mali	2003	3.343	52.893	1815.66	356.303	3.8056	5.0506	20.8118	-1.34673	1.206	-0.744712	0.348	26.9841
Mali	2004	3.442	53.538	1785.7	467.556	3.85922	5.21768	21.629	-3.09978	1.36	-0.677578	0.355	29.5567
Mali	2005	3.541	54.003	1841.85	458.756	3.52218	5.19517	20.8819	6.39788	1.325	-0.500253	0.364	39.0244
Mali	2006	3.639	54.615	1854.4	468.715		5.45589	21.1924	1.54353	1.384	-0.479206	0.373	38.5366
Mali	2007	3.738	54.941	1858.57	587.995		5.25303	23.8741	1.412	1.366	-0.426212	0.381	38.3495
Mali	2008	3.937	55.291	1893.5	532.199	3.40356	5.02687	24.1179	9.17099	1.394	-0.537265	0.39	35.4369
Mali	2009	4.136	55.874	1888.82	624.649	3.86904	5.21224	21.9996	2.46375	1.398	-0.680893	0.398	27.7512
Mali	2010	4.336	56.382	1937.95	749.688	3.34389	4.67865	24.0257	1.10893	1.382	-0.676809	0.406	28.5714
Mali	2011	4.535	56.755	1941.55	828.588	3.75423	4.01484	19.7234	2.95564	1.408	-0.648009	0.411	28.436
Mali	2012	4.734	57.079	1865.39	836.917	3.47949	3.75216	17.1831	5.32313	1.49	-0.831212	0.407	22.2749
Mali	2013	4.849	57.357	1865.7	743.58	3.28465	3.96751	19.106	-0.606736	1.54	-0.792036	0.404	22.2749
Mali	2014	5.359	57.9	1948.2	720.226	3.64819	4.48158	20.161	0.883815	1.492	-0.750902	0.41	26.4423
Mali	2015	5.868	58.363	2013.09	780.129	3.80152	4.11143	20.7609	1.45069	1.406	-0.704287	0.409	27.619
Mali	2016	6.377	58.731	2053.33	787.774	3.09478	3.77378	23.9626	-1.79965	1.367	-0.677368	0.407	29.5238
Mali	2017	6.518	59.132	2083.63	817.516	3.78977	3.67426	21.5892	1.75986	1.494	-0.666013	0.413	29.0476
Mali	2018	6.518	59.393	2122.27	871.264	3.55817	3.7325	20.4583	0.299547	1.62	-0.711568	0.417	26.6667
Mali	2019	6.518	59.664	2131.32	877.263	3.55505	3.82944	22.5317	-1.65827	2.414	-0.705256	0.421	26.6667
Mali	2020	10.445	58.633	2030.44	812.094	3.95446	3.47598	16.4658	0.438089	3.528	-0.801557	0.407	24.2857
Mali	2021	10.55	58.941	2020.45	915.401	4.36371	4.47341	21.7863	3.9256	2.29	-0.888019	0.408	20
Mali	2022	10.655	59.417	2043.67	710.666	4.035		18.8613	9.62148	3.09	-0.87945	0.41	21.2264
Mauritania	2002	3.925	61.268	4120.65	201.335	2.27715	4.00225	9.5438	3.89571	10.076	-0.0830336	0.465	52.9101
Mauritania	2003	4.077	61.347	4304.52	168.847	2.36501	4.03255	21.4753	5.1519	9.817	-0.074342	0.47	57.672
Mauritania	2004	4.229	61.593	4408.61	160.044	1.9508	3.70429	35.2538	10.3676	9.696	-0.365096	0.48	42.3645
Mauritania	2005	4.381	61.656	4660.94	154.425		3.40313	48.9053	12.1256	9.538	-0.535384	0.485	36.5854
Mauritania	2006	4.533	61.891	5182.3	105.644	1.95851	2.70253	26.0007	6.24103	9.287	-0.746409	0.495	25.8537
Mauritania	2007	4.685	62.228	4988.41	131.259		2.87644	28.1439	7.25411	9.455	-0.576471	0.495	33.9806
Mauritania	2008	4.837	62.399	4895.68	160.675		3.01339	33.0199	7.34664	9.681	-0.785068	0.495	23.301
Mauritania	2009	4.989	62.8	4841.64	112.421		3.11034	26.433	2.22092	10.155	-0.608218	0.505	31.5789
Mauritania	2010	5.141	63.105	4711.32	107.091		2.63619	32.2511	6.28354	10.054	-0.712735	0.508	25.7143
Mauritania	2011	5.293	63.346	4692.38	121.749	2.33102	2.47384	38.6536	5.68632	9.956	-0.641657	0.513	29.3839
Mauritania	2012	5.283	63.578	4725.94	165.68	2.15821	2.64919	49.1668	4.90243	9.865	-0.793573	0.522	23.6967
Mauritania	2013	5.274	63.911	4792.8	126.447	2.29354	2.868	47.5574	4.1291	9.931	-0.84668	0.53	21.8009
Mauritania	2014	5.264	64.155	4830.6	91.9032	2.558	3.46724	41.7967	3.53437	10.03	-0.932531	0.532	16.8269
Mauritania	2015	5.254	64.485	5010.95	117.288	2.83	3.67364	38.4615	3.25473	10.109	-0.939488	0.536	18.0952
Mauritania	2016	5.244	64.768	4986.6	82.4558	1.94406	3.09631	31.2776	1.47171	10.286	-0.76229	0.532	25.2381
Mauritania	2017	5.244	65.083	5184.31	81.5328		3.31551	37.8988	2.25428	10.336	-0.77436	0.536	23.8095
Mauritania	2018	5.244	65.31	5338.86	101.573		3.17839	46.4497	3.06736	10.438	-0.812102	0.546	23.3333
Mauritania	2019	8.086	65.687	5432.67	100.116	1.78445	3.30149	40.5223	2.30009	10.416	-0.865797	0.552	22.381
Mauritania	2020	7.921	64.532	5237.62	105.955	1.77161	3.38773	38.6593	2.38569	11.01	-0.815019	0.539	23.3333
Mauritania	2021	7.756	64.364	5210.34	96.4744	1.74553	4.12219	40.616	3.56516	11.068	-0.841813	0.538	21.9048
Mauritania	2022	7.591	64.691	5343.56	105.574	2.288		34.2723	9.52527	10.602	-0.798845	0.54	23.5849
Mauritius	2002	8.084	71.9659	12699.5	26.0231	3.0609	3.18897	21.759	6.41933	8.205	0.328717	0.696	66.6667
Mauritius	2003	8.577	72.1171	13212.4	29.0047	4.41583	3.18202	23.3647	3.92105	8.314	0.192946	0.704	61.3757
Mauritius	2004	9.07	72.2659	13761	32.5167	4.31307	3.31653	24.0688	4.71037	8.337	0.152765	0.711	59.1133
Mauritius	2005	9.563	72.4322	13913.9	36.0246	4.0782	3.51794	22.3669	4.93717	9.524	0.219138	0.719	60.9756
Mauritius	2006	9.698	72.4322	14674.6	37.1552	3.69751	3.60574	25.5732	8.9135	9.04	0.273244	0.725	63.9024
Mauritius	2007	9.809	72.5707	15790.7	59.2697	3.1854	3.52322	25.9852	8.82729	8.475	0.350999	0.732	69.4175
Mauritius	2008	9.921	72.5707	16373.2	48.7782	3.06307	3.93897	25.346	9.73228	7.17	0.440311	0.739	70.3884
Mauritius	2009	10.032	72.8824	16546.9	71.0987	3.04731	4.17036	23.7657	2.51609	7.257	0.465923	0.746	70.8134
Mauritius	2010	10.144	72.9673	17522.7	66.4463	3.55147	4.51898	27.1051	2.93236	7.654	0.48235	0.755	71.4286
Mauritius	2011	10.255	73.2668	18039	109.818	3.33207	4.2506	23.9464	6.52249	7.447	0.463921	0.764	70.6161
Mauritius	2012	10.367	73.8634	18629.2	89.4906	3.4182	4.21993	24.3806	3.85216	7.472	0.252168	0.774	64.9289
Mauritius	2013	10.459	74.0171	19353.5	71.694	3.56776	4.62082	21.5275	3.5433	7.322	0.252099	0.779	63.5071
Mauritius	2014	10.552	74.1944	19939.3	90.2394	4.81515	5.38025	19.0688	3.21769	7.467	0.317964	0.788	64.9038
Mauritius	2015	10.645	74.3532	20682.7	66.244	4.75847	5.55042	17.4924	1.28655	7.41	0.223687	0.791	61.4286
Mauritius	2016	10.748	74.3949	21204.3	40.8646	4.88207	5.5429	17.2729	0.977675	6.814	0.107061	0.794	59.5238
Mauritius	2017	10.748	74.5146	22380.7	40.9679	4.87887	5.61409	17.668	3.667	6.752	0.156747	0.797	60
Mauritius	2018	10.748	74.4163	23333.6	86.7651	4.67448	5.63983	18.8728	3.21605	6.427	0.186878	0.8	60
Mauritius	2019	5.881	74.2359	24213.2	34.3788	4.54195	6.02486	19.4359	0.405655	6.331	0.209807	0.806	60.4762
Mauritius	2020	5.961	74.1771	20596.6	365.153	4.35244	6.4821	18.2149	2.5808	8.627	0.441282	0.792	65.2381
Mauritius	2021	6.042	73.6802	21199.5	285.97	4.67441	6.39259	19.7932	4.02853	7.719	0.442429	0.79	65.2381
Mauritius	2022	6.122	73.5146	23251.6	88.8678	4.8442		20.4244	10.7738	6.322	0.412719	0.796	65.566
Moldova	2002	5.027	66.938	6284.21	127.002	5.49791	7.4	21.6602	5.30124	6.845	-0.98035	0.671	17.9894
Moldova	2003	5.073	67.419	6821.16	108.009	5.42489	7.02	23.1776	11.7461	6.378	-0.884173	0.681	21.164
Moldova	2004	4.913	67.861	7459.8	92.2312	6.77104	8.97	26.3592	12.5243	6.374	-1.03958	0.691	14.7783
Moldova	2005	4.753	68.169	8016.72	147.657	7.1627	9.56	30.8256	11.9592	5.633	-0.672626	0.698	30.2439
Moldova	2006	4.593	68.479	8302.75	96.5994	7.49899	10.54	32.7481	12.7778	4.26	-0.643212	0.706	31.7073
Moldova	2007	4.593	68.947	8404.98	100.29	8.29337	11.02	38.1056	12.3672	2.749	-0.660765	0.711	29.6117
Moldova	2008	3.474	69.394	9097.22	123.038	8.23727	10.95	39.2279	12.783	2.097	-0.63443	0.718	33.0097
Moldova	2009	3.479	69.573	8271.05	110.657	9.50976	13.68	23.1419	-0.0627186	3.024	-0.701458	0.713	26.7943
Moldova	2010	3.484	69.357	9022.11	104.326	7.5923	10.13	23.8518	7.48385	2.972	-0.671865	0.716	29.0476
Moldova	2011	3.488	69.192	9527.41	109.628	7.13638	9.1	24.0487	7.68725	2.677	-0.625151	0.719	30.8057
Moldova	2012	3.786	69.143	9694.76	134.871	6.98339	9.14	24.1985	4.54633	2.19	-0.614259	0.722	31.7536
Moldova	2013	4.058	69.099	10580.4	179.454	5.91	8.68	24.9382	4.59788	1.894	-0.752407	0.726	23.6967
Moldova	2014	4.331	69.031	11053.9	262.941	6.33807	8.63	23.7826	5.08879	1.451	-0.852724	0.749	20.6731
Moldova	2015	4.604	69.24	10807.3	228.913	5.80569	8.56	24.0621	9.67624	1.781	-0.936965	0.749	17.1429
Moldova	2016	4.876	69.917	11438.7	113.141	5.67208	7.54	21.9869	6.35931	1.591	-0.976332	0.755	13.8095
Moldova	2017	5.149	70.516	12133.4	111.562	5.71017	7.13	21.939	6.57023	1.622	-0.823586	0.764	20.9524
Moldova	2018	5.422	70.492	12720.2	109.244	5.53888	6.71	26.5918	3.04505	1.239	-0.746429	0.767	25.2381
Moldova	2019	5.694	70.935	13450.2	118.47	6.22577	6.5	25.1037	4.83778	1.502	-0.644489	0.773	29.0476
Moldova	2020	5.967	70.166	12262.8	106.941	6.60126	7	23.8644	3.76597	1.206	-0.57101	0.765	30
Moldova	2021	6.24	68.846	13872.1	122.709	5.82406	7.75	26.8561	5.10641	0.794	-0.468919	0.767	35.2381
Moldova	2022	6.512	68.621	12963.6	443.532	6.14757		25.8567	28.7373	0.909	-0.341932	0.763	42.4528
Mongolia	2002	3.491	63.518	4737.97	162.522	7.21078	5.18856	24.6417	0.917075	6.2	0.0258806	0.615	57.672
Mongolia	2003	3.577	64.208	4988.77	167.866		4.10219	32.2628	5.12899	6.768	-0.221845	0.629	49.2063
Mongolia	2004	3.662	64.796	5658.09	161.79	4.32573	4.15719	31.1832	8.24115	6.852	-0.269411	0.646	47.7833
Mongolia	2005	3.748	64.879	5818.41	151.033		3.75526	37.5286	12.7166	7.015	-0.604817	0.658	33.6585
Mongolia	2006	3.833	65.513	6311.69	149.223		3.74972	35.8852	5.09517	7.193	-0.587645	0.669	33.6585
Mongolia	2007	3.959	65.97	6819.8	164.821	4.69013	4.07523	38.7051	9.63096	7.2	-0.613751	0.68	32.0388
Mongolia	2008	4.085	66.382	7288.65	190.096		4.55693	43.5661	27.9557	5.565	-0.664763	0.69	30.5825
Mongolia	2009	4.211	66.766	7020.25	222.541	5.14485	4.4598	34.3709	7.61951	5.86	-0.761497	0.694	24.4019
Mongolia	2010	4.214	67.182	7001.74	234.126	4.6451	3.73946	42.087	10.0462	6.549	-0.733135	0.7	24.7619
Mongolia	2011	4.216	67.439	8058.27	259.196	4.60903	3.58612	58.1507	8.41121	4.769	-0.696975	0.71	25.1185
Mongolia	2012	4.324	68.111	8926.81	367.283	5.962	3.858	55.8986	14.3303	3.905	-0.535096	0.72	35.0711
Mongolia	2013	4.431	68.585	10031.5	365.314	5.241	4.08932	53.2757	10.4907	4.231	-0.477978	0.73	38.8626
Mongolia	2014	4.539	69.047	10320.1	224.305	5.428	4.2099	35.1753	12.254	4.798	-0.471893	0.735	38.4615
Mongolia	2015	4.646	69.498	10356.1	219.899	4.387	4.23155	24.5138	5.73568	4.861	-0.517447	0.739	37.1429
Mongolia	2016	4.754	69.865	10266.6	289.932	5.2	4.58009	22.6294	0.733272	7.235	-0.509769	0.741	36.1905
Mongolia	2017	4.754	70.237	9829.69	562.968	4.318	4.33954	27.4063	4.30143	6.359	-0.476012	0.742	40.9524
Mongolia	2018	4.754	71.199	10981.6	247.218	3.997	4.53449	39.3779	6.82425	5.377	-0.448487	0.754	39.5238
Mongolia	2019	6.701	71.822	11074	259.039	3.652	4.49498	35.5918	7.30107	9.269	-0.455313	0.749	37.1429
Mongolia	2020	6.903	72.141	10575	433.853	4.663	4.66625	22.3836	3.79604	6.594	-0.494477	0.74	34.2857
Mongolia	2021	7.105	70.975	9747.02	185.687	3.344	6.9113	36.719	7.35281	7.747	-0.552942	0.73	33.3333
Mongolia	2022	7.307	72.667	10350.9	240.166	4.258		42.3321	15.148	6.211	-0.560807	0.741	32.5472
Morocco	2002	5.648	67.547	5113.15	829.704		4.06118	24.4138	2.79562	11.59	-0.240059	0.547	48.1481
Morocco	2003	5.782	67.915	5371.9	610.916		4.08038	26.0506	1.16773	11.92	-0.31997	0.557	45.5026
Morocco	2004	5.916	68.231	5567.9	628.81		4.23211	27.8984	1.49344	10.83	-0.243783	0.564	48.7685
Morocco	2005	6.05	68.704	5699.21	656.316		4.37351	27.4168	0.982642	11.01	-0.425059	0.57	41.9512
Morocco	2006	6.05	69.128	6054.89	796.433		4.56587	27.9528	3.28476	9.67	-0.476106	0.576	39.0244
Morocco	2007	6.05	69.604	6193.03	981.017		4.80759	30.8039	2.04209	9.56	-0.386844	0.583	42.233
Morocco	2008	10.482	70.048	6469.06	813.209	4.85339	4.83789	35.5128	3.71484	9.57	-0.433666	0.59	40.2913
Morocco	2009	10.585	70.458	6544.93	916.382	4.83119	5.27312	32.1853	0.971863	8.96	-0.367966	0.596	43.5407
Morocco	2010	10.689	70.829	6684.6	845.457		5.41861	31.4907	0.993557	9.09	-0.231424	0.604	52.381
Morocco	2011	10.793	71.269	6937.93	1046.94		5.37019	32.9462	0.906925	8.91	-0.452251	0.616	40.2844
Morocco	2012	11.039	71.679	7029.49	1180.82	5.553	5.39619	32.1794	1.28712	8.99	-0.49313	0.626	37.4408
Morocco	2013	11.285	72.122	7266.28	1448.57		5.25541	32.0046	1.88065	9.23	-0.423098	0.636	41.7062
Morocco	2014	11.382	72.538	7315.5	1254.19	5.483	5.41627	30.7743	0.44231	9.7	-0.305043	0.645	47.1154
Morocco	2015	11.477	72.92	7568.45	1057.21	5.133	5.10436	30.1772	1.55791	9.46	-0.286488	0.656	48.0952
Morocco	2016	11.489	73.284	7525.55	1407.26	5.085	5.09203	31.958	1.63531	9.3	-0.190376	0.662	50.4762
Morocco	2017	11.556	73.66	7799.58	1338.71	4.736	4.9892	31.6581	0.754663	9.229	-0.199215	0.671	49.0476
Morocco	2018	11.703	73.986	7950.92	864.588	4.96	4.94517	32.1396	1.80392	9.282	-0.289578	0.677	44.7619
Morocco	2019	11.692	74.27	8093.26	925.775	5.003	4.9913	30.5949	0.303386	9.21	-0.335644	0.684	41.4286
Morocco	2020	11.761	73.92	7473.87	1406.38	6.285	5.83835	28.777	0.705969	11.203	-0.412526	0.683	38.5714
Morocco	2021	11.765	74.042	7947.9	1460.25	5.601	5.73835	30.5315	1.40196	10.539	-0.420963	0.688	38.5714
Morocco	2022	11.792	74.973	7954.52	1606.26	5.768		30.3041	6.65704	9.53	-0.357443	0.698	39.6226
Mozambique	2002	7.509	50.59	657.783	2469.89		3.27735	40.5931		2.906	-0.499133	0.325	38.6243
Mozambique	2003	7.711	50.87	743.766	920.754		3.39534	33.4266		2.869	-0.642179	0.339	32.8042
Mozambique	2004	7.914	51.249	784.924	850.589	3.3267	3.67226	28.5978		2.958	-0.613359	0.349	30.5419
Mozambique	2005	8.116	51.561	798.68	843.092	4.00578	4.37539	25.3699	6.42755	3.029	-0.534635	0.359	37.0732
Mozambique	2006	8.318	51.961	828.88	1027.49	3.87147	4.08874	23.9349	13.2451	3.027	-0.618246	0.367	32.1951
Mozambique	2007	8.52	52.566	881.319	1103.01		3.93067	22.3505	8.48949	3.065	-0.512877	0.38	36.8932
Mozambique	2008	8.749	53.164	926.013	1326.35		4.22139	22.0302	14.5028	3.095	-0.487183	0.391	37.8641
Mozambique	2009	8.978	53.788	988.189	1350.9		5.2039	19.7561	3.78861	3.182	-0.428717	0.4	40.6699
Mozambique	2010	9.206	54.198	1014.95	1421.65	5.391	5.43893	23.1955	12.4255	3.24	-0.436986	0.407	40.9524
Mozambique	2011	9.435	54.869	1075.17	1728.95	5.622	5.00312	29.4061	11.1666	3.279	-0.496196	0.412	38.3886
Mozambique	2012	9.547	55.639	1133.87	1543.88	5.67216	5.24641	50.5904	2.60245	3.305	-0.569022	0.418	34.5972
Mozambique	2013	9.658	56.492	1177.57	1755.53	6.11533	6.12585	56.3958	4.26135	3.338	-0.602599	0.432	34.1232
Mozambique	2014	9.769	57.274	1216.7	1477.14	6.494	6.33252	53.6432	2.55975	3.378	-0.669382	0.438	29.3269
Mozambique	2015	9.881	58.151	1249.57	1226.41	6.011	6.71663	42.2458	3.55076	3.426	-0.779342	0.445	24.7619
Mozambique	2016	9.992	59.038	1256.54	1222.52	5.86504	7.28134	46.2804	17.418	3.48	-0.902695	0.448	17.1429
Mozambique	2017	9.992	59.771	1250.07	1373.11	5.50556	7.83763	32.2043	15.1132	3.543	-0.857985	0.45	19.0476
Mozambique	2018	9.992	60.526	1269.43	1399.31	5.45219	8.08896	45.9808	3.91133	3.602	-0.808722	0.458	23.8095
Mozambique	2019	3.317	61.166	1265.07	1230.63	6.286	7.95273	40.8461	2.8027	3.632	-0.858943	0.465	21.9048
Mozambique	2020	3.469	61.172	1212.08	1283.99	6.643	7.56958	44.8267	3.48394	3.877	-0.774723	0.467	24.7619
Mozambique	2021	3.621	59.325	1203.25	1363.26	7.028	9.05218	40.3693	6.40848	3.984	-0.818973	0.459	22.381
Mozambique	2022	3.773	59.625	1219.24	1311.62			38.5797	10.2794	3.621	-0.836388	0.461	21.6981
Namibia	2002	5.559	51.254	6954.73	102.641	6.74233	9.68075	18.5884		21.51	0.114023	0.544	59.2593
Namibia	2003	5.768	51.083	7361.23	137.512	6.13714	9.91341	19.3883	7.13615	22.068	0.189309	0.547	60.8466
Namibia	2004	5.804	51.246	7909.8	145.636		10.1262	19.0605	4.13663	22.09	0.115224	0.551	58.6207
Namibia	2005	5.84	51.787	7806.45	94.6211		10.0844	19.6698	2.28195	22.105	0.150282	0.553	59.0244
Namibia	2006	5.875	52.655	8315.34	135.395	6.03171	10.5709	22.212	4.96117	21.861	0.196952	0.559	61.4634
Namibia	2007	5.911	53.68	8479.21	164.53		10.7163	24.0613	6.54788	22.11	0.311637	0.567	66.5049
Namibia	2008	5.947	54.653	8592.2	173.877	6.40343	9.91801	27.4739	9.09464	22.004	0.64115	0.574	73.7864
Namibia	2009	6.296	55.496	8473.74	222.254		9.04967	26.1159	9.45173	22.253	0.269764	0.579	66.0287
Namibia	2010	6.646	56.015	8669.28	241.46	8.2433	9.72781	23.78	4.87492	22.12	0.31552	0.584	66.6667
Namibia	2011	6.995	56.553	9068.24	268.254	8.021	9.83193	22.054	5.0056	19.479	0.277477	0.59	64.9289
Namibia	2012	6.957	57.64	9385.52	255.615	9.084	9.26659	26.7227	6.722	16.771	0.321496	0.599	66.8246
Namibia	2013	6.919	58.694	10110.4	264.866	8.595	9.06449	29.3954	5.60093	19.028	0.304056	0.61	66.3507
Namibia	2014	7.192	59.822	10508.8	246.768	8.994	8.40891	34.7766	5.35017	18.521	0.261684	0.619	62.5
Namibia	2015	7.389	60.7	10810.3	161.47	9.531	9.9811	30.5564	3.39402	20.799	0.270182	0.627	63.3333
Namibia	2016	7.586	61.682	10423.8	175.672	10.315	9.32232	22.0299	6.72858	23.352	0.280886	0.631	62.381
Namibia	2017	7.586	62.293	10148	171.967	9.709	8.72574	17.7665	6.1458	21.739	0.261637	0.634	62.8571
Namibia	2018	5.232	62.586	9876.17	151.041	9.622	8.31649	14.9163	4.29159	19.877	0.307371	0.635	63.3333
Namibia	2019	5.308	63.075	9758.48	146.607	9.323	8.43034	15.3291	3.72239	19.945	0.327528	0.638	62.8571
Namibia	2020	5.384	62.829	9013.51	176.609	9.278	8.90163	13.9292	2.20938	20.966	0.284112	0.634	61.9048
Namibia	2021	5.46	59.269	8991.69	195.009	10.028	9.38092	17.5127	3.61691	20.877	0.236004	0.616	60.4762
Namibia	2022	5.568	58.059	9200.03	188.068	9.678		19.9909	6.08128	19.748	0.215328	0.61	60.8491
Nepal	2002	13.335	63.264	2052.61	319.064	3.15284	3.94	20.2462	3.0294	10.655	-0.463561	0.469	40.2116
Nepal	2003	13.35	64.197	2104.37	396.195	3.11435	3.86	21.4094	5.70701	10.677	-0.588843	0.476	34.9206
Nepal	2004	13.364	64.818	2171.98	343.056	3.17194	4.05	24.5311	2.84181	10.68	-0.953119	0.484	18.2266
Nepal	2005	13.378	65.457	2236.38	383.711	3.36464	3.95	26.4512	6.83633	10.652	-0.742213	0.492	23.9024
Nepal	2006	13.392	65.868	2301.73	384.976	3.60536	3.54	26.8519	6.92034	10.659	-0.692943	0.503	28.7805
Nepal	2007	13.378	66.329	2368.75	399.244	3.51721	3.67	28.6853	2.26922	10.672	-0.791534	0.508	23.301
Nepal	2008	13.328	66.421	2496.18	528.087	3.80517	3.82	30.3156	9.90783	10.65	-0.818008	0.518	21.8447
Nepal	2009	13.277	66.761	2600.64	533.844	4.66376	3.9	31.6744	11.0948	10.64	-0.704491	0.53	26.3158
Nepal	2010	13.231	66.814	2702.04	499.033	3.63172	4.36	38.2712	9.3265	10.629	-0.695683	0.543	27.1429
Nepal	2011	13.335	67.313	2776.66	491.482	3.84262	4.45	27.8103	9.22708	10.653	-0.78744	0.552	23.2227
Nepal	2012	13.237	67.47	2905.62	524.431	3.529	4.49	28.6027	9.45981	10.654	-0.814643	0.557	22.7488
Nepal	2013	13.14	67.965	3001.33	504.297	3.203	4.63	29.6766	9.04016	10.667	-0.688907	0.563	28.91
Nepal	2014	13.042	68.085	3197.19	540.733	3.486	5.08	30.9861	8.36415	10.647	-0.588591	0.567	33.1731
Nepal	2015	12.945	67.456	3304.14	754.253	3.294	5.47	31.2774	7.86891	10.655	-0.603225	0.568	32.381
Nepal	2016	12.945	68.776	3284.58	650.92	3.477	5.42	28.241	8.79034	10.684	-0.826683	0.574	22.381
Nepal	2017	12.945	68.91	3530.74	708.045	3.529	4.72	37.3251	3.6271	10.66	-0.776277	0.581	23.3333
Nepal	2018	5.977	68.979	3743.38	649.484	3.664	4.53	39.5478	4.06116	10.63	-0.688618	0.588	27.1429
Nepal	2019	6.273	69.558	3963.23	613.702	3.486	4.45	41.3787	5.56869	10.578	-0.691047	0.598	27.1429
Nepal	2020	6.616	69.246	3805.21	543.959	4.211	5.21	30.4403	5.05237	13.157	-0.598266	0.593	29.0476
Nepal	2021	6.959	68.45	3874.43	554.186	3.956	5.42	35.1636	4.14968	12.315	-0.55614	0.591	32.381
Nepal	2022	7.303	70.484	4025.55	540.641	3.649		37.6438	7.65079	10.922	-0.532641	0.601	33.9623
Nicaragua	2002	12.409	67.18	3820.78	363.832	2.39101	5.73316	22.4323	3.75017	7.523	-0.479137	0.573	39.1534
Nicaragua	2003	12.482	67.217	3881.87	664.897	2.42201	6.08318	22.2505	5.30239	7.6	-0.541942	0.575	37.037
Nicaragua	2004	12.503	67.423	4060.67	1292.35		6.0574	24.111	8.47021	6.41	-0.44666	0.58	38.4236
Nicaragua	2005	12.55	67.936	4224.76	566.853		6.22469	25.8852	9.5991	5.37	-0.616481	0.585	32.6829
Nicaragua	2006	12.606	68.725	4308.03	435.449		6.35756	28.2519	9.1402	5.31	-0.673504	0.59	29.2683
Nicaragua	2007	12.642	69.559	4489.32	513.426		6.95643	31.3039	11.1269	4.89	-0.767759	0.596	25.2427
Nicaragua	2008	12.678	70.586	4579.18	570.222		7.16701	33.6017	19.8262	6.2	-0.76893	0.602	24.7573
Nicaragua	2009	12.714	71.433	4340.56	475.115		7.68584	23.2009	3.687	8.16	-0.727106	0.603	25.3589
Nicaragua	2010	12.771	72.009	4477.4	405.959	4.48422	7.71019	24.8402	5.45513	7.83	-0.75583	0.611	23.8095
Nicaragua	2011	12.819	72.416	4693.06	331.791		7.44982	30.9829	8.08239	6.617	-0.73797	0.619	24.1706
Nicaragua	2012	12.947	72.615	4863	253.866		7.48837	31.0118	7.19355	5.208	-0.781678	0.625	24.1706
Nicaragua	2013	12.975	72.704	4982.1	206.732		7.63869	30.9046	7.13547	5.28	-0.738183	0.631	25.5924
Nicaragua	2014	13.004	72.812	5202.11	166.224	4.08329	7.97716	28.8791	6.03597	4.52	-0.887118	0.638	19.2308
Nicaragua	2015	13.062	72.983	5360.28	170.837	4.07842	7.96303	33.4767	3.99738	4.7	-0.907132	0.644	18.5714
Nicaragua	2016	13.062	73.256	5461.91	196.25	4.08115	8.04878	31.2003	3.52317	3.9	-0.896797	0.65	18.0952
Nicaragua	2017	13.062	73.554	5609.99	198.767	4.35769	8.32754	29.9153	3.85067	3.3	-0.895876	0.656	18.0952
Nicaragua	2018	2.92	73.85	5363.94	192.468	4.474	8.49935	24.0744	4.94724	5.2	-1.02383	0.658	14.2857
Nicaragua	2019	2.987	74.054	5212.72	170.976	4.6	8.56946	17.8311	5.37629	5.47	-1.03206	0.661	15.7143
Nicaragua	2020	3.054	71.795	4878.61	134.837	4.582	8.6522	19.4165	3.68181	6.167	-1.18014	0.652	11.4286
Nicaragua	2021	3.121	73.837	5342.75	166.998	4.087	9.68343	23.283	4.92841	6.064	-1.2547	0.665	10
Nicaragua	2022	3.187	74.615	5426.51	119.802			21.7813	10.4674	4.978	-1.28731	0.669	7.54717
Niger	2002	5.676	50.562	1004.9	162.842	2.40134	4.82717	14.626	2.62887	1.807	-1.02049	0.271	15.3439
Niger	2003	5.784	51.434	988.276	300.857	1.93706	4.74741	13.9303	-1.61441	2.146	-0.91642	0.276	17.9894
Niger	2004	5.892	52.589	969.993	364.677		4.97818	12.4972	0.262544	2.748	-0.88732	0.286	21.1823
Niger	2005	6	53.59	1004.84	300.167		5.8775	19.3354	7.7975	3.1	-0.724551	0.296	26.3415
Niger	2006	6.136	54.596	1025.87	264.639	2.55852	5.99336	19.8085	0.0404858	2.532	-0.848923	0.303	20.9756
Niger	2007	6.272	55.553	1016.8	243.283	3.01462	5.43106	18.9138	0.0539593	2.027	-0.761083	0.309	25.7282
Niger	2008	6.408	56.508	1051.67	266.611	2.72312	5.24641	26.4436	11.3051	1.59	-0.730394	0.318	27.1845
Niger	2009	6.544	57.396	1033.81	255.056	3.33588	5.3385	28.4723	0.582907	1.212	-0.611199	0.325	31.1005
Niger	2010	6.68	58.367	1081.26	404.291	2.72195	4.961	32.6405	0.804073	0.721	-0.658249	0.336	30
Niger	2011	6.796	58.994	1074.55	307.911	3.07762	4.87324	31.6131	2.94239	0.317	-0.652858	0.344	27.9621
Niger	2012	6.912	59.65	1112.33	430.943	3.18682	4.30733	29.3142	0.45509	2.177	-0.647686	0.352	31.2796
Niger	2013	7.028	60.239	1133.5	341.494	3.68953	4.46636	29.7125	2.29723	1.4	-0.618868	0.358	33.1754
Niger	2014	7.144	60.786	1170	323.165	5.10368	4.45377	31.1101	-0.930287	0.524	-0.695218	0.363	27.8846
Niger	2015	7.26	61.083	1180.18	388.009	4.48669	5.34746	32.3568	-0.57609	0.558	-0.674607	0.367	28.5714
Niger	2016	7.26	61.629	1181.39	424.737	2.95843	4.53239	27.5211	1.65389	0.555	-0.666101	0.372	30.4762
Niger	2017	7.26	62.16	1198.88	466.263	2.57818	5.5761	26.0153	2.79637	0.564	-0.688092	0.377	27.1429
Niger	2018	11.785	62.454	1249.61	564.486	3.45728	5.30311	28.9188	2.9676	0.546	-0.592442	0.383	31.9048
Niger	2019	11.785	62.897	1271.73	598.52	3.526	5.66642	30.6723	-2.48979	0.544	-0.570193	0.39	31.4286
Niger	2020	11.785	61.451	1268.7	734.332	3.819	6.17012	28.4897	2.89819	0.62	-0.665765	0.391	28.0952
Niger	2021	11.788	61.576	1208.85	809.272	3.822	5.81453	27.5604	3.83787	0.819	-0.582625	0.389	31.4286
Niger	2022	11.889	62.08	1283.31	799.642	4.101		29.6208	4.22622	0.552	-0.585804	0.394	31.1321
Paraguay	2002	9.163	70.025	7743.15	59.5111	3.40773	4.75771	18.0997	10.5102	9.393	-1.36507	0.669	2.6455
Paraguay	2003	8.549	70.297	7347.28	112.489	3.38276	4.90704	20.627	14.2368	6.814	-1.43684	0.663	3.1746
Paraguay	2004	8.651	70.481	7737.8	116.371	2.8699	4.93224	20.0682	4.32326	6.513	-1.42646	0.671	3.94089
Paraguay	2005	9.117	70.527	7901.04	91.3177		4.82935	20.9032	6.80738	4.825	-1.35583	0.673	4.87805
Paraguay	2006	9.803	70.781	8511.72	109.606		5.01928	21.9504	9.58935	5.277	-1.16153	0.674	9.7561
Paraguay	2007	9.724	71.106	9310.22	130.242	2.73951	5.02043	21.3246	8.13047	4.713	-1.21104	0.681	7.76699
Paraguay	2008	9.696	71.384	9906.06	143.174		5.03776	22.2483	10.1548	4.415	-0.979694	0.691	16.5049
Paraguay	2009	9.667	71.635	9728.88	152.381		5.52497	18.916	2.59195	5.46	-0.788951	0.691	22.9665
Paraguay	2010	9.73	71.887	10686	114.67	2.77072	5.46594	23.835	4.65116	4.569	-0.707593	0.7	26.6667
Paraguay	2011	9.862	72.131	11115.7	91.1139	3.69282	5.82226	24.6616	8.25397	4.67	-0.695636	0.711	25.5924
Paraguay	2012	9.996	72.454	10883.9	83.9586	3.66879	6.53145	21.2642	3.67592	4.086	-0.850603	0.716	21.327
Paraguay	2013	10.132	72.757	11642.9	64.5308	2.679	6.06428	22.017	2.68386	4.385	-1.04778	0.729	14.218
Paraguay	2014	10.132	72.878	12129.7	56.7012	2.597	6.62719	22.6588	5.02883	5.034	-1.01069	0.731	15.3846
Paraguay	2015	10.132	73.191	12316.5	66.7565	3.334	6.69166	21.8787	3.129	4.556	-1.0183	0.738	14.7619
Paraguay	2016	9.678	73.534	12683	73.8188	3.43498	6.67557	19.8062	4.08682	5.255	-0.762675	0.736	24.7619
Paraguay	2017	9.86	73.644	13143.5	81.7742	3.091	6.60903	20.6	3.60248	6.138	-0.750455	0.739	24.2857
Paraguay	2018	10.043	73.568	13368.5	92.1788	3.296	6.74498	22.7821	3.97561	6.217	-0.870616	0.742	18.5714
Paraguay	2019	10.225	73.621	13196.1	102.629	3.49	7.16082	21.6853	2.7571	6.595	-0.893414	0.746	19.5238
Paraguay	2020	10.408	73.182	12869.9	195.06	3.93615	7.67533	20.0415	1.76752	7.548	-0.857943	0.742	21.4286
Paraguay	2021	10.59	70.262	13201.6	147.133	3.4107	8.03277	23.9981	4.78798	7.311	-1.02598	0.73	16.6667
Paraguay	2022	10.675	70.475	13161.1	92.5316	3.41497		27.6864	9.76557	6.755	-1.09022	0.731	15.0943
Peru	2002	12.675	71.661	6473.99	666.182	2.82057	4.93902	17.9681	0.193135	4.84	-0.306405	0.684	46.0317
Peru	2003	12.699	72.217	6612.1	712.541	2.9378	4.58696	17.5103	2.25938	4.15	-0.154855	0.683	53.4392
Peru	2004	12.722	72.668	6747.89	699.536	2.95787	4.42971	16.8557	3.66247	4.71	-0.429987	0.69	38.9163
Peru	2005	12.745	72.986	7023.72	694.894	2.83903	4.66595	17.2838	1.6163	4.87	-0.367371	0.685	44.3902
Peru	2006	12.768	73.172	7312.78	625.582	2.65281	4.40956	19.6506	2.00226	4.17	-0.221562	0.69	48.7805
Peru	2007	12.792	73.223	7896.02	706.552	2.6294	4.42612	22.0324	1.77999	4.08	-0.272556	0.7	49.5146
Peru	2008	12.815	73.377	8648.38	597.215	2.86775	4.53321	26.1783	5.78588	4.03	-0.206874	0.707	52.4272
Peru	2009	12.839	73.466	8740.62	554.688	3.13994	4.96516	19.9787	2.93623	3.96	-0.33254	0.711	45.933
Peru	2010	12.862	73.711	9252.91	608.051	2.8673	4.71504	23.7605	1.52832	3.6	-0.253887	0.725	50.4762
Peru	2011	12.885	74.133	9725.96	691.242	2.6635	4.53501	24.2009	3.36931	3.477	-0.243968	0.731	51.6588
Peru	2012	12.909	74.544	10363.6	488.275	2.92276	4.73489	24.6061	3.61121	3.238	-0.40407	0.741	43.128
Peru	2013	12.955	74.967	11014.6	463.594	3.29729	4.74876	25.5742	2.7679	3.575	-0.460638	0.749	39.8104
Peru	2014	13.002	75.333	11240.6	466.349	3.69599	4.96445	24.6661	3.41195	3.208	-0.599589	0.754	31.7308
Peru	2015	13.048	75.621	11613.8	531.367	3.96933	4.96122	24.3051	3.39809	3.272	-0.603387	0.758	31.9048
Peru	2016	13.048	75.789	11820.5	440.664	3.81317	4.95967	22.0213	3.55718	3.741	-0.429547	0.764	40.9524
Peru	2017	13.048	75.879	11870.3	462.349	3.93131	4.88083	20.7118	2.9949	3.691	-0.561925	0.765	35.2381
Peru	2018	3.485	76.009	12070	492.474	3.71392	5.15967	21.3112	1.50915	3.492	-0.597705	0.77	31.4286
Peru	2019	3.544	76.156	12279.3	570.233	3.82243	5.17916	20.8336	2.25212	3.379	-0.509207	0.774	34.2857
Peru	2020	3.604	73.665	10894.4	606.027	4.24804	6.28521	18.1913	2.00241	7.179	-0.524174	0.758	32.8571
Peru	2021	3.664	72.377	11509.6	394.533	3.9735	6.15173	22.3335	4.27166	5.097	-0.653226	0.755	28.5714
Peru	2022	3.747	73.385	11916.4	919.175	3.8941		22.1999	8.33371	3.85	-0.807577	0.762	22.1698
Philippines	2002	3.829	69.781	5016.93	987.891	2.89222	2.64	20.4591	2.72277	3.615	-0.538532	0.646	37.037
Philippines	2003	3.912	69.924	5160.86	1161.52	2.93518	3.08	19.5287	2.28916	3.527	-0.635372	0.652	33.8624
Philippines	2004	3.994	70.037	5380.63	908.188	2.46983	3.05	20.731	4.82921	3.554	-0.707702	0.658	28.0788
Philippines	2005	4.077	70.24	5560.59	1028.84	2.32807	3.74	18.5665	6.51685	3.795	-0.662844	0.659	30.7317
Philippines	2006	4.207	70.282	5718.78	1089.56	2.42579	3.78	16.0153	5.48523	4.052	-0.889427	0.659	20
Philippines	2007	4.337	70.483	5965.68	1115.67	2.48518	3.75	16.1286	2.9	3.434	-0.778005	0.663	23.7864
Philippines	2008	4.467	70.564	6126.24	796.512	2.58283	3.86	18.9671	8.26045	3.72	-0.778095	0.666	23.7864
Philippines	2009	4.597	70.633	6232.08	961.976	2.53777	4.16	17.4317	4.21903	3.858	-0.786739	0.666	23.445
Philippines	2010	4.727	70.754	6554.04	1138.92		4.13	20.4418	3.78984	3.605	-0.781124	0.673	22.8571
Philippines	2011	4.768	70.788	6644.13	713.283		4.03	20.7399	4.71842	3.592	-0.685035	0.677	26.5403
Philippines	2012	4.81	70.881	6996.39	762.991		4.18	19.5607	3.02696	3.504	-0.573895	0.684	34.1232
Philippines	2013	4.851	70.835	7396.82	900.488		4.27	20.6422	2.58269	3.497	-0.379904	0.689	44.0758
Philippines	2014	4.892	71.151	7726.85	1333.44	2.934	3.7	20.924	3.59782	3.6	-0.439453	0.693	41.3462
Philippines	2015	4.934	71.268	8070.97	1112.17	3.519	3.9	21.3409	0.674193	3.068	-0.480596	0.696	38.0952
Philippines	2016	4.934	71.387	8465.24	869.268	3.034	3.95	24.6185	1.2537	2.695	-0.518574	0.696	35.7143
Philippines	2017	4.934	71.516	8884.51	700.508	3.971	3.96	25.5588	2.85319	2.552	-0.507047	0.7	38.5714
Philippines	2018	11.454	71.689	9248.18	960.192	3.864	3.95	27.1506	5.30935	2.338	-0.576285	0.706	32.8571
Philippines	2019	11.573	71.865	9589.81	1241.35	3.356	4.17	26.4018	2.39207	2.237	-0.605999	0.714	30.9524
Philippines	2020	11.692	72.119	8355.1	1720.15	3.877	5.16	17.4334	2.39316	2.522	-0.510497	0.705	33.3333
Philippines	2021	11.811	69.266	8369.32	1808.65	3.881	5.87	21.1407	3.92718	3.398	-0.529578	0.692	33.8095
Philippines	2022	11.93	72.187	9058.84	1921.42	3.58	5.1	24.6859	5.82116	2.598	-0.540948	0.71	33.4906
Rwanda	2002	3.09	51.032	1000.5	279.511		3.13122	12.6161	1.99259	11.557	-0.716066	0.367	31.746
Rwanda	2003	3.13	53.368	994.989	277.473		6.93492	13.169	7.4497	11.751	-0.588588	0.385	35.4497
Rwanda	2004	3.228	55.491	1041.9	259.527		7.5093	14.3572	12.2507	11.78	-0.412592	0.403	40.3941
Rwanda	2005	3.326	57.316	1115.21	342.688		7.7255	15.1472	9.01409	11.901	-0.629166	0.421	31.7073
Rwanda	2006	3.424	58.714	1186.12	453.061		7.6096	15.0251	8.88283	11.669	-0.205525	0.44	49.7561
Rwanda	2007	3.522	59.965	1248.49	390.184	3.98514	7.86213	16.7899	9.08072	11.661	0.00706777	0.454	57.2816
Rwanda	2008	3.62	61.134	1347.7	463.435	3.50219	7.56704	21.3447	15.4382	11.601	0.108793	0.465	60.1942
Rwanda	2009	3.67	61.958	1395.35	554.615		7.80695	21.0152	12.9444	11.694	0.108439	0.477	60.7655
Rwanda	2010	3.72	62.54	1456.56	594.902	4.63131	8.08697	20.5325	-0.246129	11.7	0.36517	0.485	68.0952
Rwanda	2011	3.77	63.261	1532.54	619.372	4.3835	7.9388	20.9014	3.08017	11.801	0.362672	0.493	68.2464
Rwanda	2012	3.82	64.009	1616.44	474.559	4.42103	8.10668	23.3041	10.271	11.72	0.55988	0.501	71.564
Rwanda	2013	3.87	64.426	1647.25	579.069	4.74214	6.77649	24.4312	5.92427	11.802	0.625127	0.502	72.0379
Rwanda	2014	3.87	64.94	1697.05	487.598	4.19639	6.98844	23.229	2.35449	11.858	0.7763	0.507	75.4808
Rwanda	2015	3.87	65.298	1810.58	609.76	3.64709	6.65446	24.241	2.5285	11.849	0.597625	0.509	70.4762
Rwanda	2016	1.582	65.737	1856.52	558.012	3.43479	6.96061	25.8958	7.17434	11.805	0.618456	0.518	70.4762
Rwanda	2017	1.515	65.941	1874.03	557.942	3.12472	6.39	23.835	8.27954	11.875	0.607265	0.52	71.4286
Rwanda	2018	1.447	66.251	1976.65	523.945	3.07375	6.69895	22.3222	-0.31121	10.759	0.535657	0.522	69.0476
Rwanda	2019	1.38	66.437	2117.99	591.702	3.239	6.34387	27.0287	3.34788	11.236	0.521027	0.531	67.1429
Rwanda	2020	1.54	66.774	2019.54	586.459	3.334	7.4753	23.7347	9.8504	11.829	0.528033	0.535	67.619
Rwanda	2021	1.709	66.072	2192.84	639.542	5.59065	7.32305	26.9692	-0.391347	15.793	0.573206	0.539	70
Rwanda	2022	1.879	67.129	2316.81	545.724	4.75224		25.7418	17.6892	15.085	0.561203	0.548	70.283
Senegal	2002	5.453	58.231	2574.26	354.216	2.59442	3.95294	23.115	2.3373	2.808	0.247914	0.399	64.5503
Senegal	2003	5.495	59.122	2661.15	410.607	2.75125	4.29704	23.9263	-0.051997	2.774	-0.141307	0.407	53.9683
Senegal	2004	5.537	60.027	2721.4	913.56	3.07778	4.56856	23.6337	0.514782	2.77	0.0232224	0.414	56.1576
Senegal	2005	5.579	60.915	2769.21	530.965	4.06443	3.67467	24.5729	1.71133	2.685	-0.0353757	0.421	55.6098
Senegal	2006	5.622	61.75	2768.07	713.181	3.82138	3.76338	22.4168	2.11229	2.755	-0.373094	0.429	41.4634
Senegal	2007	5.665	62.543	2772.68	463.748		3.41497	24.6184	5.8533	2.796	-0.514299	0.442	36.4078
Senegal	2008	5.707	63.242	2807.37	621.195	4.02568	3.50688	26.2267	7.3472	2.813	-0.50016	0.454	37.3786
Senegal	2009	5.75	63.923	2786.91	535.73	4.92073	3.84157	20.3975	-2.24802	2.807	-0.490049	0.461	37.3206
Senegal	2010	5.793	64.615	2807.69	559.746	5.21774	4.02764	20.0869	1.22868	2.798	-0.641386	0.47	30.4762
Senegal	2011	5.822	65.262	2751.56	575.749	4.90303	4.21417	21.0003	3.40323	2.853	-0.503729	0.483	37.9147
Senegal	2012	5.851	65.457	2782.3	701.174	4.77699	4.26688	24.6241	1.41823	3.887	-0.258423	0.491	49.2891
Senegal	2013	5.88	66.072	2771.66	665.208	5.68656	4.38574	24.0663	0.710245	4.989	-0.188867	0.497	53.0806
Senegal	2014	5.88	66.452	2856.49	841.111	5.72021	4.38962	25.8808	-1.09026	5.842	0.0588305	0.501	58.6538
Senegal	2015	5.88	66.879	2936.04	683.131	5.45638	4.3779	25.8333	0.135212	6.757	0.0312389	0.501	57.619
Senegal	2016	2.953	67.497	3036.7	485.899	5.11309	4.25607	25.3617	0.837285	4.455	-0.0243895	0.51	56.1905
Senegal	2017	3.044	67.75	3168.08	608.202	4.62497	4.16359	29.8156	1.31815	4.078	-0.114238	0.511	52.8571
Senegal	2018	3.136	68.097	3282.58	698.456	4.85822	4.43182	32.6479	0.460986	3.567	-0.0468401	0.515	55.2381
Senegal	2019	3.165	68.526	3342.12	723.354	5.449	4.49531	31.9657	1.76011	2.863	-0.00381422	0.514	55.7143
Senegal	2020	3.193	68.006	3303.05	867.877	5.689	5.15119	35.633	2.54315	3.405	-0.00738584	0.514	55.7143
Senegal	2021	3.222	67.093	3421.11	768.574	5.589	4.35098	38.353	2.18032	3.368	0.0421113	0.512	57.1429
Senegal	2022	3.251	67.913	3463.81	734.443	5.641		45.5934	9.69682	2.968	-0.0287281	0.517	54.2453
Serbia	2002	5.576	72.2854	10109.1	2866.98		7.59296	18.933	19.4908	13.8	-0.895785	0.701	23.2804
Serbia	2003	5.643	72.4366	10554.1	1152.17		7.66696	19.8979	9.87618	15.2	-0.494189	0.71	39.1534
Serbia	2004	5.711	72.6829	11510	676.265		7.842	26.1564	11.0264	18.5	-0.493294	0.721	35.468
Serbia	2005	5.778	72.8341	12010.7	973.562		8.28381	22.7085	16.12	20.85	-0.406051	0.732	42.439
Serbia	2006	5.846	73.3854	12579.3	1335.58		8.4939	21.7355	11.724	20.85	-0.277591	0.743	46.8293
Serbia	2007	5.916	73.6317	13407.8	527.868	4.20984	9.37649	24.9883	6.39171	18.06	-0.341682	0.753	45.1456
Serbia	2008	5.916	73.8854	14282.1	565.632	4.28094	9.48246	26.4199	12.411	13.67	-0.302462	0.764	47.5728
Serbia	2009	5.916	73.9854	14133.7	309.272	4.48398	9.34624	18.6567	8.11695	16.116	-0.317943	0.766	48.3254
Serbia	2010	7.738	74.3366	14206.5	363.711	3.90093	9.5273	17.6001	6.14255	19.204	-0.319416	0.768	47.1429
Serbia	2011	7.778	74.5366	14352.9	295.337	4.23836	9.1138	18.3294	11.1374	22.959	-0.299286	0.773	49.2891
Serbia	2012	7.819	74.8366	14413.9	239.212	3.84768	9.3282	19.269	7.33039	24	-0.357433	0.78	45.4976
Serbia	2013	7.86	75.1854	14799.3	205.209		9.31232	17.3778	7.69426	22.154	-0.327526	0.785	46.4455
Serbia	2014	7.9	75.3366	14643.7	230.682		9.24599	16.5225	2.08245	19.223	-0.247089	0.787	50.4808
Serbia	2015	7.941	75.2878	14856.2	221.849		8.8132	18.681	1.39236	17.66	-0.318084	0.794	46.1905
Serbia	2016	7.981	75.6878	15290.5	252.582	3.6347	8.45891	18.0781	1.12231	15.257	-0.382536	0.8	42.381
Serbia	2017	8.022	75.539	15536.1	361.752	3.71016	8.22039	19.5753	3.13106	13.477	-0.435452	0.802	41.9048
Serbia	2018	8.063	75.8902	16562.9	338.437	3.58232	8.53168	22.655	1.95984	12.733	-0.396322	0.808	40.4762
Serbia	2019	8.103	75.9366	17311.5	346.36	3.61647	8.66553	25.0875	1.84923	10.395	-0.449989	0.812	37.619
Serbia	2020	8.144	74.478	17696.2	342.308		8.70042	24.1879	1.57553	9.011	-0.451218	0.806	37.1429
Serbia	2021	8.184	72.7805	19042.6	364.54	3.29966	10.0125	25.1724	4.0851	10.061	-0.458569	0.804	35.7143
Serbia	2022	8.225	75.4822	19494	424.678			26.5125	11.9815	8.684	-0.456188	0.805	35.3774
Sierra Leone	2002	10.1	46.359	1093.56	322.787	3.59434	9.40314	11.8062		3.901	-0.789459	0.346	27.5132
Sierra Leone	2003	10.203	46.963	1152.99	290.999	3.299	8.45331	11.3299		3.879	-0.892783	0.355	19.5767
Sierra Leone	2004	10.307	47.577	1185.1	192.38	3.14693	8.67061	10.4298		3.42	-0.881413	0.363	21.6749
Sierra Leone	2005	10.412	48.237	1204.86	140.981	2.83727	9.04396	11.4096		3.724	-1.08549	0.369	13.6585
Sierra Leone	2006	10.518	49.323	1069.93	175.986		9.02353	10.2736		3.9	-1.02615	0.371	16.5854
Sierra Leone	2007	10.624	50.365	1393	383.952	2.59678	8.52284	9.5506	11.65	4.018	-0.91934	0.392	19.4175
Sierra Leone	2008	10.73	51.526	1480.48	181.648	2.46589	8.81158	9.24929	8.21112	4.14	-0.978875	0.403	16.9903
Sierra Leone	2009	10.836	52.626	1489.59	193.376	2.81821	9.68422	9.94111	7.46902	4.282	-0.942291	0.411	18.6603
Sierra Leone	2010	10.942	53.693	1418.26	198.896	2.58851	9.12688	31.0875	7.18566	4.427	-0.780792	0.416	23.3333
Sierra Leone	2011	10.801	54.62	1502.66	164.68	2.67825	10.7675	42.0752	6.79138	4.554	-0.860042	0.424	20.8531
Sierra Leone	2012	10.661	55.451	1460.16	181.717	2.8816	8.94355	27.949	6.58776	4.56	-0.9574	0.427	17.5355
Sierra Leone	2013	10.521	56.313	1906.55	255.569	2.37981	11.5902	13.7613	5.52413	4.538	-0.911971	0.445	19.9052
Sierra Leone	2014	10.521	56.393	1915.15	480.759	2.66291	19.69	13.6891	4.63931	4.678	-0.948121	0.447	15.8654
Sierra Leone	2015	10.521	57.189	1508.7	585.567	3.218	19.6582	15.4071	6.68944	4.621	-0.820208	0.438	22.8571
Sierra Leone	2016	1.9	58.404	1561.71	466.19	2.91134	15.7885	19.1427	10.8861	4.312	-0.841147	0.446	20.9524
Sierra Leone	2017	7.695	58.652	1568.08	323.67	4.66086	9.39976	18.5932	18.2215	3.848	-0.590535	0.448	32.8571
Sierra Leone	2018	8.119	59.796	1596.02	273.889	6.98963	8.28988	14.8284	16.0295	3.193	-0.511336	0.454	35.7143
Sierra Leone	2019	8.543	60.255	1634.79	268.906	7.44701	9.12993	12.532	14.805	3.204	-0.471662	0.457	36.1905
Sierra Leone	2020	8.966	59.763	1553.56	234.827	8.80955	9.32589	12.1008	13.4469	3.485	-0.396271	0.453	39.5238
Sierra Leone	2021	9.39	60.062	1592.37	199.569	9.44224	8.55334	11.1669	11.874	3.516	-0.456326	0.456	36.1905
Sierra Leone	2022	9.814	60.411	1612.67	175.417	8.80635		11.737	27.2083	3.194	-0.563655	0.458	33.0189
Solomon Islands	2002	6.13	67.515	1773.15	54.5583		10.105	5.94571	10.9296	2.635	0.18245	0.497	61.3757
Solomon Islands	2003	6.34	67.644	1872.43	144.379		7.07563	9.03525	8.26946	2.256	0.214312	0.503	61.9048
Solomon Islands	2004	6.209	67.801	1998.35	184.305		7.72384	9.91922	6.98584	2.015	-0.0656907	0.51	54.1872
Solomon Islands	2005	6.366	67.936	2094.66	245.594		9.01593	12.6039	7.33066	1.879	0.0877809	0.516	58.0488
Solomon Islands	2006	6.434	68.09	2069.83	246.136		8.00585	11.6457	11.22	1.915	-0.202771	0.523	50.2439
Solomon Islands	2007	6.529	67.986	2027.57	287.595	7.33327	7.18299	13.1005	7.66602	1.975	-0.374891	0.524	43.2039
Solomon Islands	2008	6.623	68.404	2053.76	256.298	6.89515	5.50597	13.3782	17.3201	1.996	-0.354255	0.533	43.2039
Solomon Islands	2009	6.718	68.466	2076.94	252.06	6.65859	6.60599	12.7913	7.09272	2.02	-0.2816	0.54	49.2823
Solomon Islands	2010	6.825	68.732	2276.74	296.91	7.47837	4.6614	17.9442	1.05148	1.622	-0.339228	0.553	45.7143
Solomon Islands	2011	6.969	68.908	2343.81	253.5		5.02313	15.0194	7.34271	1.297	-0.346252	0.557	45.0237
Solomon Islands	2012	7.112	69.084	2404.82	234.67		4.8748	14.6177	5.91201	0.987	-0.357465	0.558	45.0237
Solomon Islands	2013	7.151	69.188	2599.8	233.453		4.57886	14.6466	5.39136	0.694	-0.400275	0.563	42.654
Solomon Islands	2014	7.151	69.234	2528.03	174.027		4.88792	12.6372	5.1659	0.728	-0.266558	0.562	49.5192
Solomon Islands	2015	7.151	69.583	2487.59	185.718		4.44579	15.9452	-0.574469	0.735	-0.345678	0.562	45.7143
Solomon Islands	2016	9.409	69.801	2529.42	163.084		4.40254	17.2166	0.512486	0.735	-0.355937	0.564	42.8571
Solomon Islands	2017	9.505	69.988	2572.23	166.54		4.14993	19.5613	0.488687	0.727	0.095241	0.566	58.0952
Solomon Islands	2018	9.602	70.173	2597.55	174.877		3.77378	19.1382	3.46147	0.723	-0.0343346	0.568	55.7143
Solomon Islands	2019	9.699	70.382	2588.39	196.763		4.32406	22.6953	1.63486	0.746	-0.0503519	0.568	53.3333
Solomon Islands	2020	9.798	70.199	2527.86	137.56		4.79699	16.7235	2.96355	0.852	0.0699475	0.566	58.0952
Solomon Islands	2021	9.898	70.348	2424.55	212.366		4.76345	16.9502	-0.115438	0.866	-0.163581	0.564	49.5238
Solomon Islands	2022	9.999	70.742	2273.31	173.747			23.3629	5.51813	1.579	-0.184422	0.562	49.0566
South Africa	2002	7.565	55.666	10859.5	513.885	4.54569	6.67774	15.0361	9.49471	19.658	0.332902	0.633	67.1958
South Africa	2003	7.666	54.331	11052.8	553.23	4.3521	7.04098	15.6571	5.67942	19.728	0.275541	0.629	64.5503
South Africa	2004	7.768	54.043	11525.1	511.101	4.50898	6.93842	16.9604	-0.69203	19.634	0.397753	0.63	69.4581
South Africa	2005	7.869	53.98	12014	518.916	4.5245	6.86216	16.8318	2.06285	19.557	0.483857	0.632	69.2683
South Africa	2006	7.991	54.278	12565.2	721.649	4.52652	6.87651	18.4902	3.24391	19.425	0.378271	0.637	69.7561
South Africa	2007	8.112	54.992	12936.5	848.032	4.44667	6.90511	19.326	6.17781	19.39	0.197672	0.644	61.6505
South Africa	2008	8.389	56.022	13221.5	1007.7	4.37425	7.14832	21.2872	10.0746	19.507	0.153829	0.653	62.1359
South Africa	2009	8.425	57.447	12967.6	1076.5	4.76119	7.64941	18.7669	7.21531	20.512	0.125427	0.665	61.244
South Africa	2010	8.462	58.899	13208.5	1033.51	5.13497	7.79358	17.5956	4.08973	23.181	0.0653931	0.675	61.4286
South Africa	2011	8.575	60.651	13401	1211.49	5.28898	7.94434	18.8532	4.99927	21.416	-0.00423371	0.686	57.346
South Africa	2012	8.687	61.846	13522.3	994.533	5.52323	8.00429	18.5845	5.72466	21.786	-0.184171	0.696	53.0806
South Africa	2013	8.808	62.533	13684.7	1229.9	5.35072	8.10322	19.1688	5.78447	22.038	-0.137832	0.705	54.5024
South Africa	2014	8.808	63.38	13654.4	1057.14	5.48978	7.87137	18.488	6.12984	22.606	-0.124875	0.714	54.3269
South Africa	2015	8.808	63.95	13574.6	1214.78	5.48285	8.05304	18.6332	4.54064	22.869	-0.0705104	0.721	54.7619
South Africa	2016		64.747	13493.8	1254.45	5.44424	8.07959	16.9605	6.5714	24.023	0.0174095	0.711	57.1429
South Africa	2017		65.402	13563.7	1019.07	5.59867	7.97711	16.6107	5.18425	23.992	-0.127465	0.725	52.381
South Africa	2018		65.674	13601.1	984.197	5.64401	8.0882	16.1706	4.51717	24.218	-0.136328	0.731	52.381
South Africa	2019		66.175	13506	898.4	5.9277	8.24419	15.8208	4.12025	25.538	-0.0310517	0.741	54.2857
South Africa	2020		65.252	12598.4	1194.79	6.18336	8.57259	12.5375	3.21004	24.339	-0.0589598	0.722	53.3333
South Africa	2021		62.341	13047.6	1332.3	6.56206	8.27309	13.045	4.61167	28.77	-0.0341142	0.721	53.8095
South Africa	2022		61.48	13185.6	1173.97	6.18348		15.3788	7.03973	28.838	-0.319765	0.717	43.8679
Sri Lanka	2002	10.579	71.117	6101.39	363.025		4.04	23.2891	9.55103	8.76	-0.216593	0.695	50.2645
Sri Lanka	2003	10.642	71.373	6435.02	456.026		3.65	22.0205	6.31464	8.22	-0.27202	0.7	47.619
Sri Lanka	2004	10.631	67.091	6716.57	511.612		4.04	25.2538	7.57593	8.38	-0.167388	0.683	50.7389
Sri Lanka	2005	10.827	72.118	7055.03	926.948		3.88	26.8275	11.6397	7.67	-0.339862	0.71	46.8293
Sri Lanka	2006	11.25	71.969	7510.94	790.572		3.85	27.9799	10.0202	6.5	-0.194801	0.713	51.2195
Sri Lanka	2007	11.25	72.049	7960.62	644.941		3.82	27.9521	15.8421	5.97	-0.146114	0.718	52.9126
Sri Lanka	2008	5.416	71.729	8252.56	692.521		3.85	27.5524	22.5645	5.22	-0.218608	0.719	50.4854
Sri Lanka	2009	5.624	69.187	8552.67	667.822	2.0559	4.06	24.4339	3.46496	5.85	-0.396393	0.711	42.5837
Sri Lanka	2010	5.832	73.215	9258.84	620.336	1.66178	3.74		6.21765	4.784	-0.419683	0.735	41.9048
Sri Lanka	2011	6.04	73.38	9954.08	552.421	1.74292	3.58		6.71677	4.118	-0.399363	0.741	42.654
Sri Lanka	2012	5.825	73.906	10698.5	523.393	1.45342	3.31		7.54291	3.88	-0.241881	0.747	50.237
Sri Lanka	2013	5.681	74.239	10936.4	494.82	1.56459	3.69		6.90845	4.186	-0.22083	0.752	52.1327
Sri Lanka	2014	5.536	74.651	11429.9	504.606	1.85859	3.47		3.179	4.157	-0.345143	0.757	45.1923
Sri Lanka	2015	5.701	74.927	11919.4	395.359	2.10998	3.68	34.2758	3.76837	4.519	-0.376569	0.76	43.3333
Sri Lanka	2016	5.866	75.331	12452.1	337.645	3.22929	3.62	36.453	3.95889	4.243	-0.335665	0.765	44.2857
Sri Lanka	2017	6.031	75.403	13212.3	355.906	2.59317	3.33	39.7266	7.70414	4.046	-0.489461	0.77	39.5238
Sri Lanka	2018	6.196	75.748	13405.8	363.925	1.98781	3.64	38.0568	2.13504	4.318	-0.352467	0.774	42.381
Sri Lanka	2019	6.361	76.008	13263	409.377		3.9	34.1087	3.52839	4.67	-0.303826	0.775	44.2857
Sri Lanka	2020	6.526	76.393	12589.8	412.986	1.555	4.02	32.8711	6.15395	5.365	-0.330454	0.777	43.3333
Sri Lanka	2021	6.691	76.399	12958.8	366.468	1.508	4.07	36.7342	7.01478	5.258	-0.356353	0.783	42.381
Sri Lanka	2022	6.856	76.61	11899.5	336.538	1.2		28.6033	49.7211	6.33	-0.383287	0.78	40.0943
Tajikistan	2002	5.164	64.846	1599.57	180.996	2.77579	4.44	9.29572	12.25	14.148	-1.17497	0.569	6.87831
Tajikistan	2003	5.347	65.552	1724.86	115.372	2.42079	4.7	9.13672	16.3035	13.751	-1.14775	0.581	8.46561
Tajikistan	2004	5.333	66.028	1897.76	122.86	2.77203	4.8	11.7773	7.14197	13.364	-1.31921	0.591	7.38916
Tajikistan	2005	5.318	66.514	2234.37	138.301	3.51213	5.21	11.6477	7.09193	12.995	-1.17605	0.606	12.1951
Tajikistan	2006	5.304	67.013	2447.19	125.185	3.4035	5.03	15.9664	10.0109	12.627	-1.04283	0.615	16.0976
Tajikistan	2007	5.289	67.217	2576.29	121.47	3.41327	5.54	24.6329	13.1491	12.254	-1.04097	0.62	15.0485
Tajikistan	2008	5.275	67.688	2734.26	161.38	3.45983	5.91	26.5087	20.4705	11.869	-1.18693	0.628	9.2233
Tajikistan	2009	5.26	68.039	2684.23	146.563	4.09831	5.86	24.8448	6.44823	11.5	-1.22177	0.629	6.69856
Tajikistan	2010	5.441	67.742	2838.12	164.904	4.00675	5.74	23.8462	6.44531	10.844	-1.2972	0.631	4.7619
Tajikistan	2011	5.627	68.148	3009.23	148.131	3.93511	5.86	29.2094	12.4315	10.187	-1.23177	0.636	7.109
Tajikistan	2012	5.82	68.484	3162.28	160.452	4.01803	5.98	23.2674	5.83117	9.519	-1.28034	0.641	6.63507
Tajikistan	2013	6.02	68.885	3349.32	150.157		6.53	24.9057	5.00965	8.86	-1.28733	0.647	7.109
Tajikistan	2014	6.02	69.069	3405.5	179.255		6.67	26.5157	6.10443	8.206	-1.13205	0.649	12.0192
Tajikistan	2015	6.02	69.306	3438.98	147.946	4.96774	6.91	44.6895	5.71456	7.554	-1.14802	0.651	11.9048
Tajikistan	2016	10.054	69.549	3548.43	124.279	5.731	6.96	40.5223	6.00458	6.9	-1.16323	0.655	11.9048
Tajikistan	2017	10.058	69.905	3709.16	121.09	5.545	6.85	29.9296		6.9	-1.34799	0.659	8.09524
Tajikistan	2018	10.062	70.353	3912.07	144.341	5.385	7.01	37.2634		6.898	-1.42829	0.664	6.66667
Tajikistan	2019	10.066	70.867	4110.55	115.984	5.568	6.95	35.3887		6.898	-1.34555	0.668	9.04762
Tajikistan	2020	10.071	67.994	4205.48	117.041	5.961	8.18	33.475		7.176	-1.3448	0.656	8.09524
Tajikistan	2021	10.24	71.594	4543.67	130.873	6.1549	8.01	34.8739		7.253	-1.35408	0.677	6.66667
Tajikistan	2022	10.409	71.288	4807.21	135.07	5.447		35.4675		6.981	-1.43415	0.679	6.13208
Tanzania	2002	11.363	53.863	1466.36	1245.88		4.68908	18.0881	5.31783	3.021	-0.840932	0.414	24.8677
Tanzania	2003	11.399	54.895	1515.1	1026.1		5.34231	20.6844	5.30357	3.051	-0.734542	0.425	28.0423
Tanzania	2004	11.436	55.596	1584.67	1158.93	3.56123	5.73734	24.4936	4.7358	3.104	-0.56557	0.435	33.0049
Tanzania	2005	11.472	56.299	1647.08	934.78	3.54625	6.32283	27.3959	5.03457	3.192	-0.607606	0.445	33.1707
Tanzania	2006	11.509	56.911	1736.14	1084.96	3.00992	7.59828	30.324	7.25097	3.299	-0.228577	0.455	48.2927
Tanzania	2007	11.44	57.52	1781.28	1790.98	4.03342	6.88428	32.6512	7.02551	3.024	-0.335751	0.464	47.0874
Tanzania	2008	11.371	58.086	1835.04	1370.26	4.18591	5.55705	37.4895	10.2784	2.775	-0.416348	0.472	40.7767
Tanzania	2009	11.302	58.894	1886.39	1511.79	3.96076	5.06306	34.3557	12.1422	2.5	-0.447849	0.482	39.7129
Tanzania	2010	11.233	60.105	1937.37	1791.61	4.5417	5.22392	32.0172	6.20016	3.029	-0.542279	0.493	35.7143
Tanzania	2011	11.164	61.049	2026.58	1754.01	4.578	5.05598	34.736	12.691	3.47	-0.60336	0.498	33.6493
Tanzania	2012	11.156	62.03	2066.58	1838.09	4.23	5.01779	34.8451	16.0011	3.223	-0.76462	0.501	26.0664
Tanzania	2013	11.148	62.96	2138.68	2189.08	4.638	4.64643	37.4706	7.87072	2.93	-0.780951	0.504	22.7488
Tanzania	2014	11.14	63.873	2222.77	1502.63	3.38488	4.01492	37.654	6.13161	2.125	-0.761074	0.506	25.4808
Tanzania	2015	11.131	64.651	2270.72	1597.53	4.195	3.6497	32.7587	5.58817	2.162	-0.709463	0.507	27.1429
Tanzania	2016	11.123	65.386	2333.9	1608.63	4.102	3.9635	32.1748	5.17477	2.237	-0.53109	0.509	34.7619
Tanzania	2017	11.123	65.999	2414.47	1602.75	4.43051	4.08257	32.3541	5.31872	2.313	-0.487049	0.517	40
Tanzania	2018	11.123	66.535	2483.64	1629.93	3.69954	4.16192	38.3766	3.49446	2.409	-0.475711	0.525	38.5714
Tanzania	2019	8.738	66.989	2537.39	1280.33	3.597	3.88136	39.7264	3.46428	2.518	-0.423008	0.533	38.5714
Tanzania	2020	8.949	66.408	2502.29	1395.63	3.231	2.93978	38.7465	3.29029	2.781	-0.40892	0.535	39.0476
Tanzania	2021	8.631	66.201	2538.31	1160.74	3.115	3.36136	39.6867	3.69092	2.806	-0.3969	0.529	40.4762
Tanzania	2022	8.313	66.782	2578.16	1125.77	3.238		41.0678	4.35027	2.609	-0.3411	0.532	41.9811
Thailand	2002	10.863	72.93	10187.3	692.075	3.86492	3.33472	22.7442	0.697309	1.82	-0.338848	0.688	44.4444
Thailand	2003	10.856	73.155	10762.1	650.355	3.72561	3.24313	23.8293	1.80435	1.54	-0.196024	0.698	51.3228
Thailand	2004	10.85	73.08	11314.9	794.954	4.03089	3.13893	25.6814	2.75915	1.51	-0.246132	0.707	48.2759
Thailand	2005	10.844	73.82	11680.3	733.457	3.93859	3.15972	30.4208	4.54037	1.35	-0.206433	0.715	50.7317
Thailand	2006	10.837	74.938	12266.1	501.722	4.05038	3.09971	27.0116	4.63747	1.22	-0.41343	0.721	40
Thailand	2007	10.831	75.187	12876.5	275.49	3.60315	3.19278	25.496	2.24154	1.18	-0.400172	0.732	40.2913
Thailand	2008	10.825	75.492	12968.4	225.509	3.5085	3.45934	28.2264	5.46849	1.18	-0.440627	0.735	38.835
Thailand	2009	10.888	75.842	12805.6	194.669	3.86194	3.6194	20.6364	-0.845716	1.49	-0.332013	0.738	46.4115
Thailand	2010	10.952	76.131	13578.5	292.626	3.50844	3.3901	25.3567	3.24759	0.622	-0.360339	0.743	43.3333
Thailand	2011	11.015	76.421	13856.8	343.858	4.80555	3.56825	26.7915	3.80879	0.66	-0.353244	0.749	44.5498
Thailand	2012	11.079	76.772	14436.7	324.701	3.597	3.52294	28.0242	3.0149	0.58	-0.397404	0.752	43.6019
Thailand	2013	11.143	77.083	14455.3	608.57	3.824	3.45313	27.4571	2.18489	0.249	-0.372476	0.754	44.5498
Thailand	2014	11.143	77.415	14711.2	492.081	3.919	3.68448	23.919	1.89514	0.576	-0.48052	0.785	37.0192
Thailand	2015	11.143	77.717	15098.2	268.647	3.864	3.85229	22.3556	-0.900425	0.597	-0.55555	0.789	35.2381
Thailand	2016	4.044	78.049	15623.3	471.767	3.768	3.93901	21.1055	0.18815	0.688	-0.451498	0.793	39.0476
Thailand	2017	4.188	78.394	16246.1	458.912	3.465	3.85277	22.9343	0.665632	0.83	-0.445775	0.795	41.4286
Thailand	2018	4.337	78.662	16813.2	344.311	3.198	3.8704	25.2196	1.0639	0.766	-0.458019	0.796	39.0476
Thailand	2019	4.491	78.975	17334.9	353.485	3.022	3.78912	23.8148	0.706729	0.716	-0.47176	0.801	35.7143
Thailand	2020	4.65	79.274	16443.8	309.917	3.153	4.35729	23.7554	-0.845937	1.099	-0.483638	0.8	35.2381
Thailand	2021	4.816	78.715	16481.5	334.906	2.986	5.16039	28.6255	1.2304	1.215	-0.478348	0.797	34.7619
Thailand	2022	4.987	79.68	16886.5	779.624	2.613		27.8291	6.07741	0.94	-0.452194	0.803	35.8491
Togo	2002	11.131	55.311	1642.97	60.3285	2.56634	2.90227	30.6691	3.05982	4.085	-0.75807	0.443	30.1587
Togo	2003	11.167	55.639	1710.24	61.6281	2.44759	2.93838	32.0952	-0.930001	3.964	-0.902239	0.449	19.0476
Togo	2004	11.203	55.569	1644.67	56.0454	2.28831	3.08553	35.5642	0.393079	3.999	-0.943994	0.448	19.2118
Togo	2005	11.24	55.962	1528.61	64.1931	2.32521	3.30243	25.1114	6.78293	4.151	-0.873771	0.446	20
Togo	2006	11.276	56.222	1525.61	61.0142	2.52774	3.44604	19.0238	2.22898	4.229	-1.04961	0.452	15.6098
Togo	2007	11.312	56.511	1469.12	67.0793	2.58339	3.86665	18.7842	0.945673	3.822	-0.997273	0.445	17.4757
Togo	2008	11.349	56.695	1493.28	156.312	2.41758	3.84064	17.0863	8.69483	3.286	-0.975758	0.452	17.4757
Togo	2009	11.385	57.011	1531.33	373.374	2.84629	4.07617	14.4915	3.71361	2.853	-1.03231	0.46	17.2249
Togo	2010	11.421	57.304	1580.53	242.658	3.01441	4.45493	15.8404	1.44595	2.385	-0.967423	0.469	17.1429
Togo	2011	11.377	57.925	1715.97	388.168	3.17112	4.55413	19.9044	3.56351	1.982	-1.02653	0.483	17.0616
Togo	2012	11.333	58.073	1710.26	107.898	3.47276	4.80787	17.6962	2.57718	2.028	-1.00772	0.487	16.1137
Togo	2013	11.29	58.684	1774.5	77.9551	3.25526	4.94374	22.1147	1.82539	2.083	-1.03469	0.495	15.1659
Togo	2014	11.29	58.853	1838.09	81.0334	3.52084	5.07999	22.3768	0.190875	2.142	-0.899913	0.502	18.2692
Togo	2015	11.29	59.396	1928.14	100.992	3.75931	4.95647	25.185	2.585	2.204	-0.755234	0.51	25.7143
Togo	2016	10.907	59.55	1951.9	68.0336	3.68649	6.59756	20.1573	1.28545	2.963	-0.707866	0.515	27.1429
Togo	2017	10.901	60.154	1974.24	82.9978	3.76053	6.49392	16.8363	-0.98189	3.744	-0.736028	0.522	25.7143
Togo	2018	10.894	60.244	2029.6	99.2364	4.09168	6.08895	19.1358	0.927755	2.903	-0.749032	0.528	25.7143
Togo	2019	10.888	60.901	2079.6	89.8769	4.202	5.72619	18.6014	0.674653	2.056	-0.747289	0.536	26.1905
Togo	2020	10.882	61.035	2068.42	97.5742	4.091	6.03786	21.3309	1.69928	2.211	-0.731193	0.54	26.6667
Togo	2021	10.875	61.619	2141.92	146.096	4.231	5.55532	19.8641	4.18622	2.285	-0.691679	0.545	27.619
Togo	2022	10.869	61.588	2214.23	132.645	3.798		21.4193	7.96757	2.065	-0.649672	0.547	28.3019
Tunisia	2002	9	74.059	7651.93	28.6583	5.79006	5.12036	23.8113	2.72103	14.55	0.28365	0.663	65.6085
Tunisia	2003	9.118	74.305	7957.1	24.2779	6.81675	5.20889	23.3233	2.71259	14.51	0.123505	0.669	60.3175
Tunisia	2004	9.235	74.49	8362.64	22.5211	6.72079	5.19891	23.3019	3.63228	14.23	0.0678435	0.679	56.6502
Tunisia	2005	9.352	74.764	8494.25	30.0759	6.45157	5.14556	21.6794	2.01779	12.872	-0.0780683	0.686	54.6341
Tunisia	2006	9.469	74.921	8901.31	25.0139	6.4388	5.1311	23.4495	3.22525	12.51	-0.0125321	0.693	56.5854
Tunisia	2007	9.586	75.072	9369.19	32.9637	6.46452	5.17543	23.6822	2.96694	12.365	-0.109465	0.7	54.3689
Tunisia	2008	9.703	75.185	9651.09	26.5009	6.27157	5.16441	25.5236	4.34503	12.444	-0.165582	0.705	53.3981
Tunisia	2009	9.82	75.267	9896.46	37.9906	6.52848	5.40595	24.2887	3.6649	13.291	-0.079157	0.709	56.9378
Tunisia	2010	9.938	75.421	10003.2	52.4579	5.96307	5.60951	25.8363	3.33898	13.049	-0.118835	0.713	53.8095
Tunisia	2011	10.055	75.46	9687.96	55.9057		6.12299	25.0372	3.24003	18.334	-0.0224449	0.715	56.872
Tunisia	2012	10.172	75.55	10017.6	54.687	5.95086	6.28985	26.097	4.61184	17.63	-0.033658	0.716	57.346
Tunisia	2013	10.289	75.65	10116.9	46.854		6.51395	23.8678	5.31624	15.934	-0.0413553	0.719	56.872
Tunisia	2014	10.406	75.65	10401	52.3274		6.45006	23.8646	4.62555	14.259	-0.0187258	0.721	55.7692
Tunisia	2015	10.523	75.692	10472.9	49.8119	6.22045	6.2134	21.739	4.43737	15.159	-0.076951	0.724	54.2857
Tunisia	2016	10.645	75.786	10517.6	54.7049		6.24778	20.4751	3.6294	15.557	-0.162974	0.728	52.8571
Tunisia	2017	10.645	75.845	10619	57.4171		6.18557	21.2946	5.30885	15.33	-0.159314	0.732	50.9524
Tunisia	2018	10.645	75.95	10775.3	65.4868		5.93752	22.9635	7.30759	15.459	-0.113984	0.737	53.3333
Tunisia	2019	4.296	75.993	10821.4	48.3988		6.02461	19.8034	6.72008	17.153	-0.140877	0.74	50.9524
Tunisia	2020	4.412	75.292	9709.94	59.0333		7.05025	12.6882	5.63415	17.576	-0.116654	0.734	50.9524
Tunisia	2021	4.527	73.772	10123	59.5498		6.97274	15.5416	5.70635	16.505	-0.263699	0.729	46.6667
Tunisia	2022	4.642	74.263	10296.6	68.1339			16.6084	8.30646	15.301	-0.25135	0.732	45.283
Turkiye	2002	4.758	72.579	14903.6	632.093		5.06	21.1076	44.9641	10.358	-0.570129	0.685	34.9206
Turkiye	2003	4.873	72.89	15489	406.32		5.01	22.3086	21.6024	10.542	-0.209118	0.691	49.7355
Turkiye	2004	4.988	73.24	16788.3	385.247		4.91	24.9817	8.59826	10.838	-0.191904	0.696	50.2463
Turkiye	2005	5.104	73.534	17991.5	505.744		4.89	26.8036	8.17916	10.636	-0.0352728	0.701	56.0976
Turkiye	2006	5.219	73.845	18989.6	524.484		5.15	29.3487	9.59724	10.227	0.0266746	0.711	57.561
Turkiye	2007	5.334	74.193	19634.1	624.543		5.24	28.6015	8.75618	10.285	0.112519	0.718	59.2233
Turkiye	2008	5.449	74.45	19518.4	916.762	3.32056	5.22	28.739	10.4441	10.965	0.115326	0.721	61.165
Turkiye	2009	5.464	74.765	18317.2	802.777	3.76505	5.49	22.8163	6.25098	14.026	0.0876557	0.728	60.2871
Turkiye	2010	5.479	75.069	19681.2	872.648	3.78701	5.02	26.7525	8.56644	11.879	0.0254152	0.75	59.0476
Turkiye	2011	5.494	74.941	21574.9	661.293	4.22152	4.65	31.0033	6.47188	9.789	0.0382425	0.763	58.7678
Turkiye	2012	5.525	75.678	22298.2	425.053	4.38722	4.44	28.0729	8.89157	9.21	0.161345	0.772	61.6114
Turkiye	2013	5.557	76.297	23744	572.044	4.34481	4.37	29.6195	7.49309	9.713	0.0917898	0.802	60.6635
Turkiye	2014	5.589	76.565	24492.9	997.144	4.41258	4.33	28.9675	8.85457	9.901	-0.134038	0.812	53.8462
Turkiye	2015	5.615	76.646	25415.7	755.489	4.3222	4.12	28.1992	7.67085	10.304	-0.161285	0.821	52.381
Turkiye	2016	5.64	76.66	25785.8	1424.06	4.62774	4.28	28.0196	7.77513	10.899	-0.198886	0.826	50
Turkiye	2017	5.64	77.141	27238.3	2043.65	4.32369	4.18	30.6942	11.1443	10.919	-0.208401	0.833	48.0952
Turkiye	2018	5.64	77.563	28001.3	1285.45	4.30004	4.12	29.4582	16.3325	10.956	-0.351103	0.838	42.8571
Turkiye	2019	4.097	77.832	27950.5	1079.67	4.45403	4.37	24.8781	15.1768	13.73	-0.325626	0.842	42.8571
Turkiye	2020	4.272	75.85	28380.9	1191.97	4.00861	4.62	31.3406	12.279	13.148	-0.361127	0.835	41.9048
Turkiye	2021	4.448	76.032	31310	898.79	2.84528	4.57	31.4045	19.5965	11.969	-0.407551	0.841	39.5238
Turkiye	2022	4.624	78.475	32833.5	1259.22	2.61521		35.0399	72.3088	10.432	-0.467645	0.855	34.9057
Uganda	2002	7.995	49.648	1307.93	599.004		4.77136	20.2174	-0.287509	3.5	-1.02574	0.414	14.2857
Uganda	2003	8.184	50.368	1351.11	744.539		4.29918	20.9841	8.68048	3.6	-0.948509	0.427	17.4603
Uganda	2004	8.372	51.547	1392.23	792.89	4.95237	4.70024	20.1457	3.72129	2.706	-0.811879	0.441	24.1379
Uganda	2005	8.372	52.976	1434.7	797.276		5.80519	22.3551	8.44873	1.9	-0.833649	0.451	21.9512
Uganda	2006	8.327	54.369	1550.62	1040.64		6.46333	21.1304	7.31068	2.27	-0.787619	0.463	23.9024
Uganda	2007	8.404	55.236	1641.29	1042.27		6.11311	22.0831	6.13851	2.675	-0.825755	0.473	20.3883
Uganda	2008	8.479	55.823	1734.92	1070.65		5.45476	22.9778	12.0509	3.049	-0.840164	0.481	20.8738
Uganda	2009	8.524	56.488	1802.73	1124.21		5.78846	26.616	13.0173	3.6	-0.909787	0.491	19.6172
Uganda	2010	8.614	57.055	1848.5	1106.42	1.7274	6.8089	27.104	3.97655	3.619	-0.923494	0.5	18.5714
Uganda	2011	8.669	57.965	1966.58	1063.7	2.29891	6.69591	26.755	16.5643	3.528	-0.936402	0.504	18.9573
Uganda	2012	8.704	58.817	1972.38	1003.69	1.79747	6.10854	26.1772	12.679	3.551	-1.00158	0.504	17.0616
Uganda	2013	8.831	59.763	1983.41	1141.75	1.87114	5.78252	31.974	4.90521	1.91	-1.05595	0.511	13.2701
Uganda	2014	8.907	60.408	2020.24	1159.45	1.91472	5.33653	26.8535	3.07571	2.404	-1.09738	0.518	12.9808
Uganda	2015	8.983	61.086	2068.87	1087.69	2.32152	5.07457	23.8598	5.58969	2.788	-1.08108	0.525	13.3333
Uganda	2016	9.058	61.648	2099.46	1220.28	2.13789	4.96169	25.4153	5.70638	3.167	-1.08622	0.531	12.8571
Uganda	2017	9.058	62.115	2078.32	1451.51	2.25364	3.99789	24.614	5.20972	3.643	-1.06967	0.534	13.8095
Uganda	2018	9.058	62.714	2124.42	1357.81	2.13052	4.02081	24.3286	2.61601	3.42	-1.05088	0.539	13.8095
Uganda	2019	12.894	62.991	2190.26	1269.97	2.308	3.79835	25.5295	2.86759	3.185	-1.17658	0.544	11.4286
Uganda	2020	12.859	62.851	2201.8	1379.09	2.572	4.30199	24.216	3.31332	3.914	-1.06808	0.545	16.1905
Uganda	2021	12.825	62.705	2207.36	1412.77	2.636	4.67197	24.0864	2.20457	3.422	-1.03054	0.545	16.1905
Uganda	2022	12.83	63.638	2240.59	1211.88	2.561		24.2013	7.19579	2.93	-1.0418	0.55	16.0377
Ukraine	2002	12.912	68.2756	8408.25		5.24007	5.99	20.1907	0.757421	10.136	-1.09139	0.721	9.52381
Ukraine	2003	12.951	68.2107	9293.32		5.40019	6.55	21.9426	5.17968	9.057	-0.966655	0.73	16.4021
Ukraine	2004	12.99	68.1854	10487.6		5.12376	6.17	21.0959	9.04807	8.59	-0.979342	0.739	16.2562
Ukraine	2005	13.006	67.9568	10857.6	326.173	5.8482	6.35	22.5065	13.5696	7.18	-0.740643	0.743	24.878
Ukraine	2006	13.052	68.0776	11674.1	356.441	5.97946	6.42	24.5428	9.05252	6.81	-0.772782	0.752	24.878
Ukraine	2007	13.103	68.2222	12769	286.021	5.90244	6.02	27.7812	12.8388	6.351	-0.820175	0.759	21.3592
Ukraine	2008	13.141	68.2515	13015.6	319.337	6.15242	5.5	27.3926	25.2265	6.363	-0.862514	0.763	19.9029
Ukraine	2009	13.2	69.19	11099.3	417.821	7.05075	6.61	17.0684	15.8812	8.84	-1.07174	0.761	15.311
Ukraine	2010	13.225	70.2654	11795.4	462.747	7.39708	6.81	18.3724	9.37293	8.1	-1.03196	0.766	16.1905
Ukraine	2011	13.252	70.8093	12320.2	430.539	5.93771	6.82	20.444	7.95572	7.851	-1.08671	0.772	14.6919
Ukraine	2012	13.343	70.9441	12839.4	445.463	6.4427	7.12	19.6147	0.568728	7.529	-1.11754	0.774	12.3223
Ukraine	2013	13.413	71.1595	12824.8	339.143	6.4199	6.94	16.4258	-0.238949	7.17	-1.17626	0.774	10.9005
Ukraine	2014	13.502	71.1866	12237.3	845.945	5.87494	7.2	13.3965	12.0719	9.27	-1.02434	0.774	14.4231
Ukraine	2015	13.593	71.1895	11671.6	1317.39	5.743	7.78	15.9333	48.6999	9.14	-1.03895	0.764	13.8095
Ukraine	2016	13.683	71.4763	11649.5	1026.77	5.00978	7.55	21.7242	13.9127	9.35	-0.866793	0.767	19.0476
Ukraine	2017	13.575	71.781	12032.8	855.115	5.41708	7.44	19.9647	14.4383	9.5	-0.831376	0.771	21.4286
Ukraine	2018	13.575	71.5827	12455.7	839.285	5.31992	7.52	18.5883	10.9519	8.799	-0.921202	0.771	17.619
Ukraine	2019	10.226	71.8273	12964.4	848.751	5.4413	7.09	14.8904	7.88672	8.194	-0.800243	0.774	24.7619
Ukraine	2020	10.317	71.1851	12699.3	833	5.38232	7.56	8.9323	2.73249	9.475	-0.831856	0.762	22.8571
Ukraine	2021	10.408	69.6478	12566.9	980.243	5.741	8.01	14.4675	9.36314	9.834	-0.786468	0.755	24.2857
Ukraine	2022	10.501	68.5879	11416.2	17862	5.9339		12.1133	20.1836		-0.633566	0.734	29.2453
Uzbekistan	2002	7.512	66.604	2787.76	234.969		5.14	21.2		10.224	-0.964739	0.617	19.5767
Uzbekistan	2003	7.99	67.04	2879.15	205.144		5.19	20.8		9.185	-0.914872	0.624	18.5185
Uzbekistan	2004	8.138	67.401	3077.75	218.129		4.84	24.5		8.126	-1.06881	0.631	13.7931
Uzbekistan	2005	8.253	67.49	3257.92	137.196		4.78	28		7.074	-1.22964	0.636	9.7561
Uzbekistan	2006	8.688	67.891	3425.16	131.121		4.75	29.6101		6.026	-1.01634	0.642	17.0732
Uzbekistan	2007	9.122	68.292	3989.46	76.1217		4.54	28.2057		4.99	-1.03379	0.655	15.534
Uzbekistan	2008	9.252	68.765	4178.22	132.208		4.7	32.0363		4.89	-1.06286	0.66	14.5631
Uzbekistan	2009	9.382	68.871	4488.92	100.191		4.8	29.9478		5.04	-1.27607	0.666	5.26316
Uzbekistan	2010	9.511	69.235	4994.24	118.857		5.3	27.1782		5.36	-1.30799	0.675	4.28571
Uzbekistan	2011	9.641	69.649	5318.81	84.4053	5.81876	5.26	26.708	13.7797	4.96	-1.38756	0.682	2.8436
Uzbekistan	2012	10.312	69.874	5636.22	106.474	6.02692	5.55	30.0719	13.2088	4.87	-1.31068	0.688	4.2654
Uzbekistan	2013	10.311	69.99	6002.77	137.43	5.74191	5.72	27.4742	11.8414	4.86	-1.27304	0.693	8.05687
Uzbekistan	2014	10.083	70.234	6272.91	128.717	5.71323	4.43	27.9592	9.28309	5.09	-1.19444	0.698	9.61539
Uzbekistan	2015	9.856	70.475	6489.98	207.489	5.495	4.74	26.3433	8.75188	5.15	-1.2853	0.701	8.57143
Uzbekistan	2016	9.628	70.755	6727.07	244.345	5.415	4.72	25.7593	8.13089	5.16	-1.19976	0.709	10.9524
Uzbekistan	2017	9.628	71.01	6974.36	342.411	5.033	4.84	29.1363	13.8757	5.83	-1.18752	0.714	11.9048
Uzbekistan	2018	9.628	71.149	7297.81	265.541	4.836	5.08	37.2045	17.5242	5.391	-1.0824	0.719	12.8571
Uzbekistan	2019	6.067	71.344	7487.42	646.61	6.295	5.43	41.8093	14.5257	4.945	-1.04689	0.725	15.2381
Uzbekistan	2020	6.279	70.331	7366.02	610.861	4.948	6.75	39.9547	12.8677	5.293	-1.07282	0.716	15.7143
Uzbekistan	2021	6.491	70.862	7783.79	462.3	5.368	7.74	40.3679	10.8492	5.345	-0.829331	0.721	22.8571
Uzbekistan	2022	6.704	71.674	8055.91	447.455	5.284		37.4804	11.4466	4.535	-0.757623	0.727	24.5283
Vanuatu	2002	2.452	69.196	2457.59	39.8301	8.13198	3.90438	19.5415	1.96357	8.654	0.23014		62.963
Vanuatu	2003	2.6	69.276	2494.41	45.7564	8.44151	3.50692	16.8458	3.01624	8.71	0.262945		64.0212
Vanuatu	2004	2.8	69.313	2515.96	47.86		3.53992	23.2385	1.41892	8.465	-0.138782		52.7094
Vanuatu	2005	3	69.39	2546.97	43.2407		3.30529	24.1193	1.1992	8.132	0.294559	0.557	63.9024
Vanuatu	2006	2.902	69.462	2754.61	55.0207		3.32189	28.547	2.04082	8.006	0.192251	0.564	60.9756
Vanuatu	2007	2.803	69.544	2759.39	57.9148		3.10786	32.8935	3.93548	6.852	0.273236	0.567	63.1068
Vanuatu	2008	2.705	69.602	2976.71	100.762	5.95151	3.1381	41.7403	4.84171	5.658	0.357459	0.575	66.5049
Vanuatu	2009	2.607	69.653	2894.3	117.556	5.16051	3.25198	41.6412	4.29707	4.565	0.338911	0.576	67.9426
Vanuatu	2010	2.508	69.617	2878.32	111.423		3.52656	37.0069	2.76269	4.683	0.300519	0.578	65.2381
Vanuatu	2011	2.598	69.551	2920.41	77.8517		3.59819	28.7251	0.873793	4.819	0.308374	0.581	66.3507
Vanuatu	2012	2.687	69.497	2784.81	86.1005		3.93563	24.0885	1.3474	4.949	0.344245	0.581	67.2986
Vanuatu	2013	2.777	69.534	2895.71	79.6606		4.39234	27.3922	1.45893	5.057	0.292245	0.586	64.455
Vanuatu	2014	2.777	69.465	2963.38	92.9353	5.18195	3.64669	24.267	0.798864	5.15	0.476412	0.59	68.2692
Vanuatu	2015	2.777	69.513	2911.97	169.513	5.60338	4.32168	32.8998	2.48327	5.255	-0.122393	0.592	53.3333
Vanuatu	2016	8.522	69.65	2991.34	109.423		2.9313	23.6734	0.842069	5.262	-0.0870689	0.596	53.8095
Vanuatu	2017	8.759	69.71	3039.2	105.976	4.53343	2.76285	27.861	3.08453	5.288	0.0038484	0.599	56.1905
Vanuatu	2018	8.823	69.795	3148.62	86.8762		3.31754	26.8001	2.33096	5.326	-0.184302	0.604	49.5238
Vanuatu	2019	8.899	69.877	3578.56	83.1483	1.77407	3.31453	24.4374	2.76252	5.445	-0.284158	0.614	45.7143
Vanuatu	2020	8.95	70.299	3204.95	99.7112	2.17359	3.99482	46.907	5.32935	4.046	-0.169317	0.612	47.1429
Vanuatu	2021	9.076	70.449	3236.88	126.945		4.37338	55.058	2.34328	4.734	-0.0398655	0.614	53.3333
Vanuatu	2022	9.215	70.492	3243.98	83.9238			56.0657	6.67931	5.171	-0.028941	0.614	53.3019
